# Supplementary material for: Multiple UBX proteins reduce the ubiquitin threshold of the mammalian p97-UFD1-NPL4 unfoldase
Source: eLife. 2022 Aug 3;11:e76763. doi: 10.7554/eLife.76763 (PMC9377798; doi:10.7554/eLife.76763)
Supplement: Figure 1—figure supplement 1—source data 1. [file elife-76763-fig1-figsupp1-data1.pdf]

06/05/22

15 min

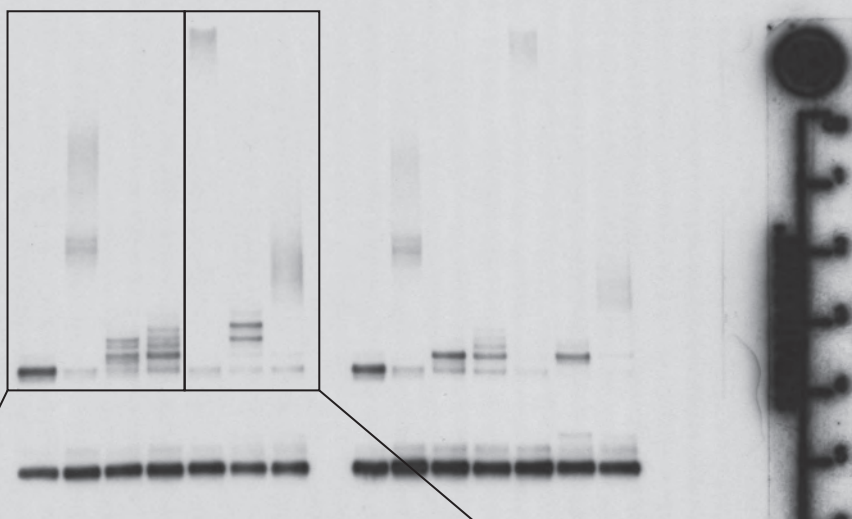

Cropped area for Figure 1-figure supplement 1D  
Mcm7

Cropped area for Figure 1-figure supplement 1A  
Mcm7

04/05/22

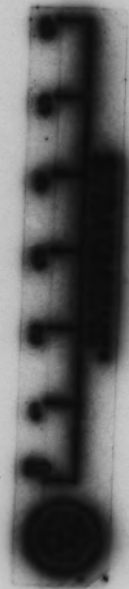

1 min

20 sec

Mcm7

250 .

150 .

100 .

Cdc45

75 .

Cdc45

75 .

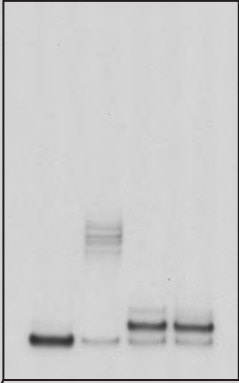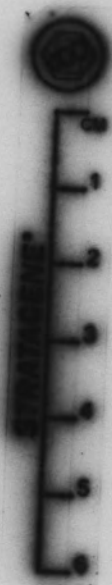

Cropped area for Figure 1-figure supplement 1B  
Mcm7

19104/22

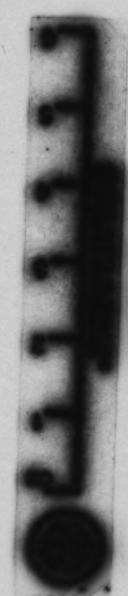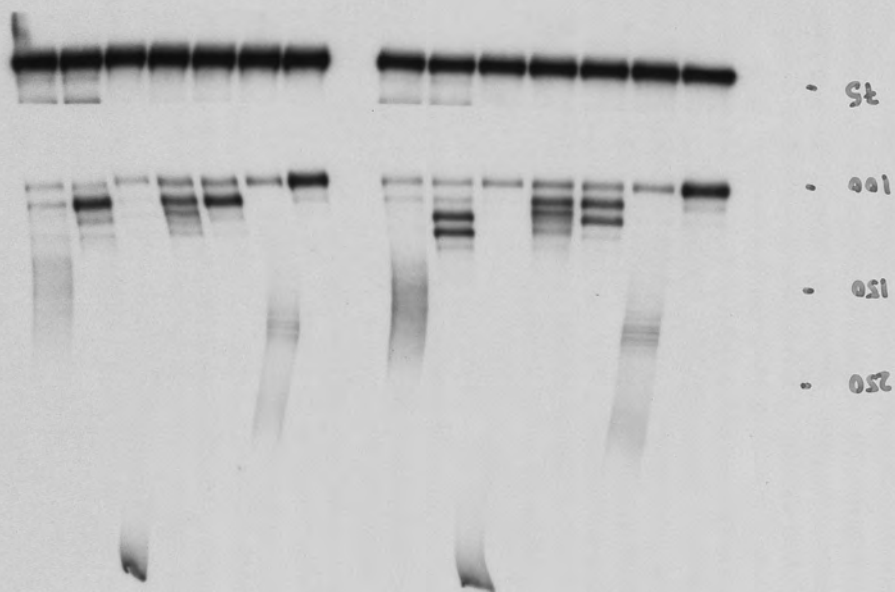

10min

3min

250 -  
150 -  
100 -  
75 -

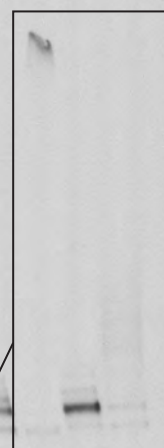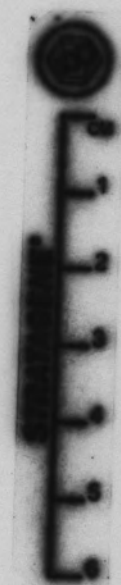

Cropped area for Figure 1-figure supplement 1C  
Mcm7
