# Supplementary material for: Multiple UBX proteins reduce the ubiquitin threshold of the mammalian p97-UFD1-NPL4 unfoldase
Source: eLife. 2022 Aug 3;11:e76763. doi: 10.7554/eLife.76763 (PMC9377798; doi:10.7554/eLife.76763)
Supplement: Figure 2—figure supplement 2—source data 1. [file elife-76763-fig2-figsupp2-data1.pdf]

Cropped area for Mcm7

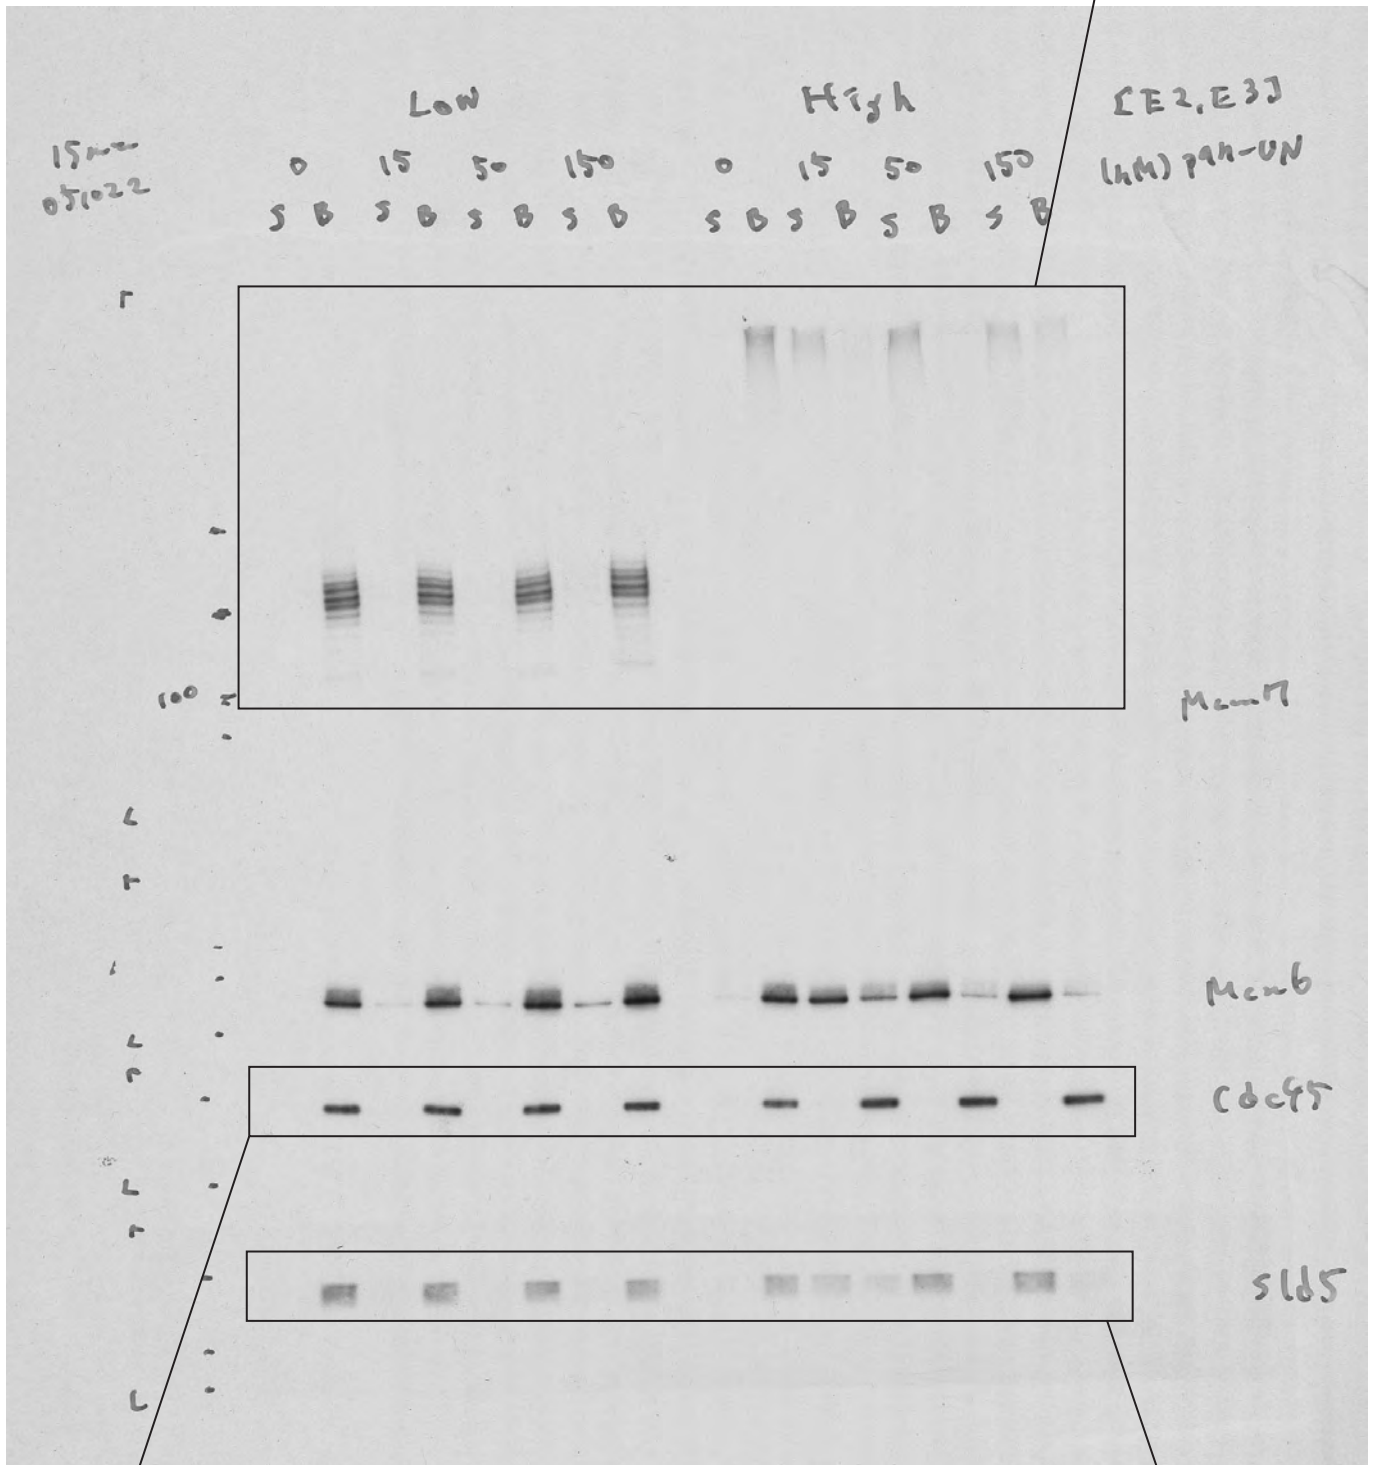

Cropped area for Cdc45

Cropped area for Sld5

422  
051022

Low High

[E2,E3]  
p99-UN (nm)

0 15 50 150 0 15 50 150

S B S B S B S B S B S B S B

Mem7

Mem6

cd45

sld5

Cropped area for Mcm6
