# Supplementary material for: Multiple UBX proteins reduce the ubiquitin threshold of the mammalian p97-UFD1-NPL4 unfoldase
Source: eLife. 2022 Aug 3;11:e76763. doi: 10.7554/eLife.76763 (PMC9377798; doi:10.7554/eLife.76763)
Supplement: Figure 3—source data 1. [file elife-76763-fig3-data1.pdf]

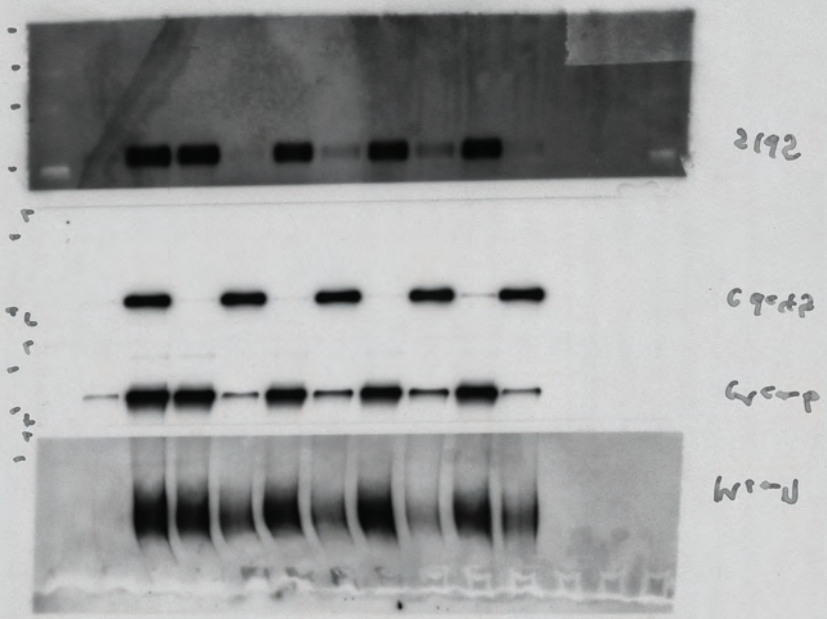

15 min  
10 30 51

Y H Y H Cdc45/P47  
Y H H Y UN  
S D S D S D S D S D

1 min  
Very Long of clon  
by 25 nM E2  
10 nM E3

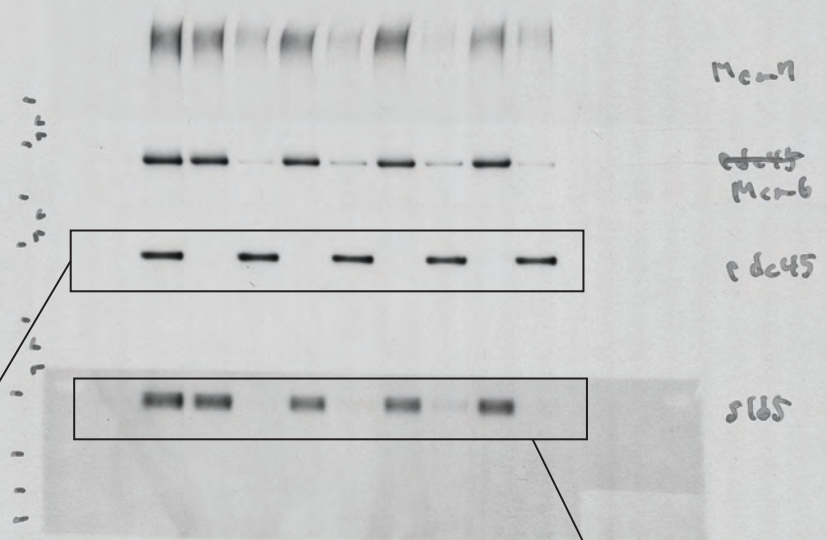

Cropped area for Figure 3A  
Cdc45

Cropped area for Figure 3A  
Sld5

1h  
020822

|   |   |   |   |   |   |           |
|---|---|---|---|---|---|-----------|
| - | Y | H | Y | H | - | Cd-48/p97 |
| - | Y | H | H | Y | Y | UN        |
| S | B | S | B | S | B | S         |

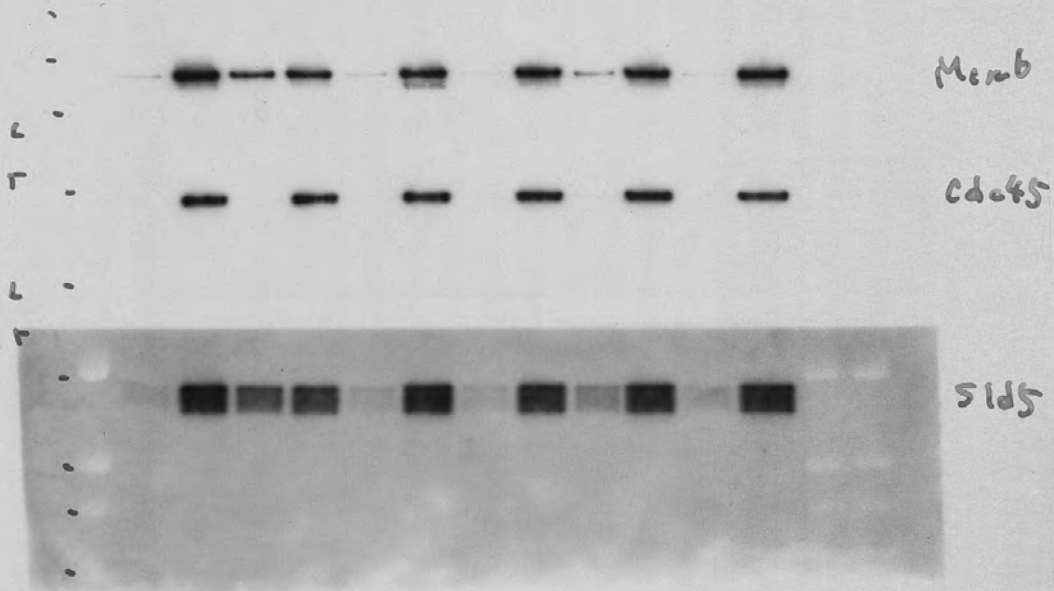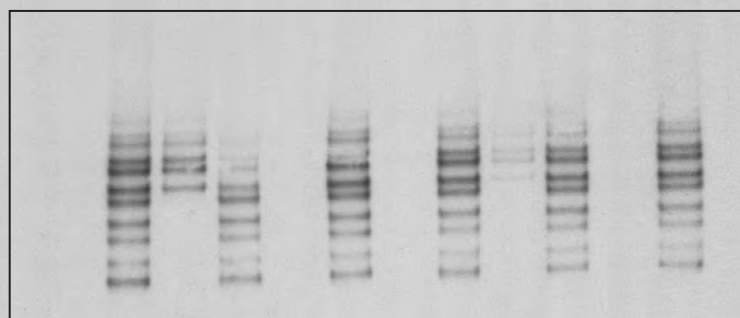

Mcm7

Cropped area for Figure 3B  
Mcm7

9m  
020822

|   |   |   |   |   |   |           |   |   |   |
|---|---|---|---|---|---|-----------|---|---|---|
| - | Y | H | Y | H | - | Cdc43/p27 |   |   |   |
| - | Y | H | H | Y | Y | UN        |   |   |   |
| S | B | S | B | S | B | S         | B | S | B |

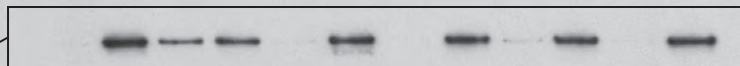

Mcm6

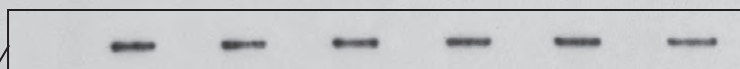

Cdc45

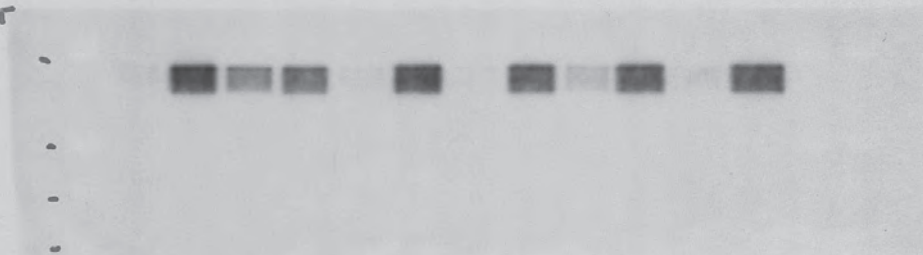

Slp5

Cropped area for Figure 3B  
Cdc45

Mcm7

3m  
020022

- Y H Y H -  
- Y H H Y Y  
S B S B S B S B

Cdc42/p41  
UN

1  
2  
3  
4  
5  
6  
7  
8  
9  
10  
11  
12  
13  
14  
15  
16  
17  
18  
19  
20  
21  
22  
23  
24  
25  
26  
27  
28  
29  
30  
31  
32  
33  
34  
35  
36  
37  
38  
39  
40  
41  
42  
43  
44  
45  
46  
47  
48  
49  
50  
51  
52  
53  
54  
55  
56  
57  
58  
59  
60  
61  
62  
63  
64  
65  
66  
67  
68  
69  
70  
71  
72  
73  
74  
75  
76  
77  
78  
79  
80  
81  
82  
83  
84  
85  
86  
87  
88  
89  
90  
91  
92  
93  
94  
95  
96  
97  
98  
99  
100

Mem6

Cdc45

Sld5

Cropped area for Figure 3B  
Sld5

Mem7
