# Supplementary material for: Multiple UBX proteins reduce the ubiquitin threshold of the mammalian p97-UFD1-NPL4 unfoldase
Source: eLife. 2022 Aug 3;11:e76763. doi: 10.7554/eLife.76763 (PMC9377798; doi:10.7554/eLife.76763)

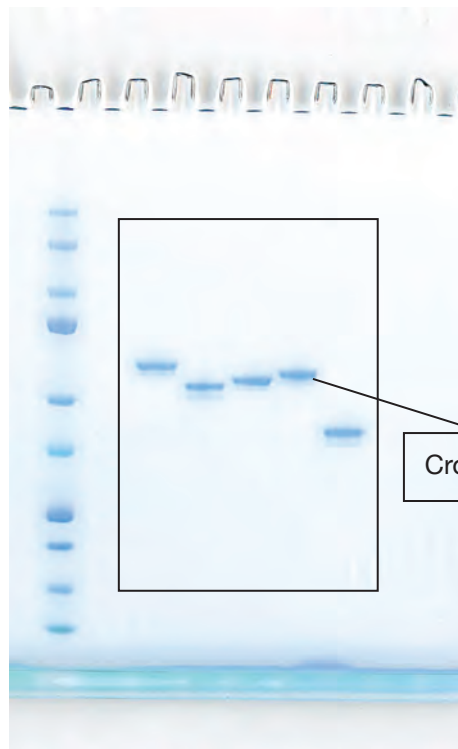

Cropped area for Figure 5B

Cropped area for Figure 5C  
Cdc45

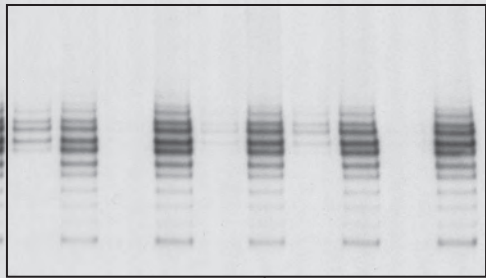

Cropped area for Figure 5C  
Mcm7

Cropped area for Figure 5C  
Mcm6

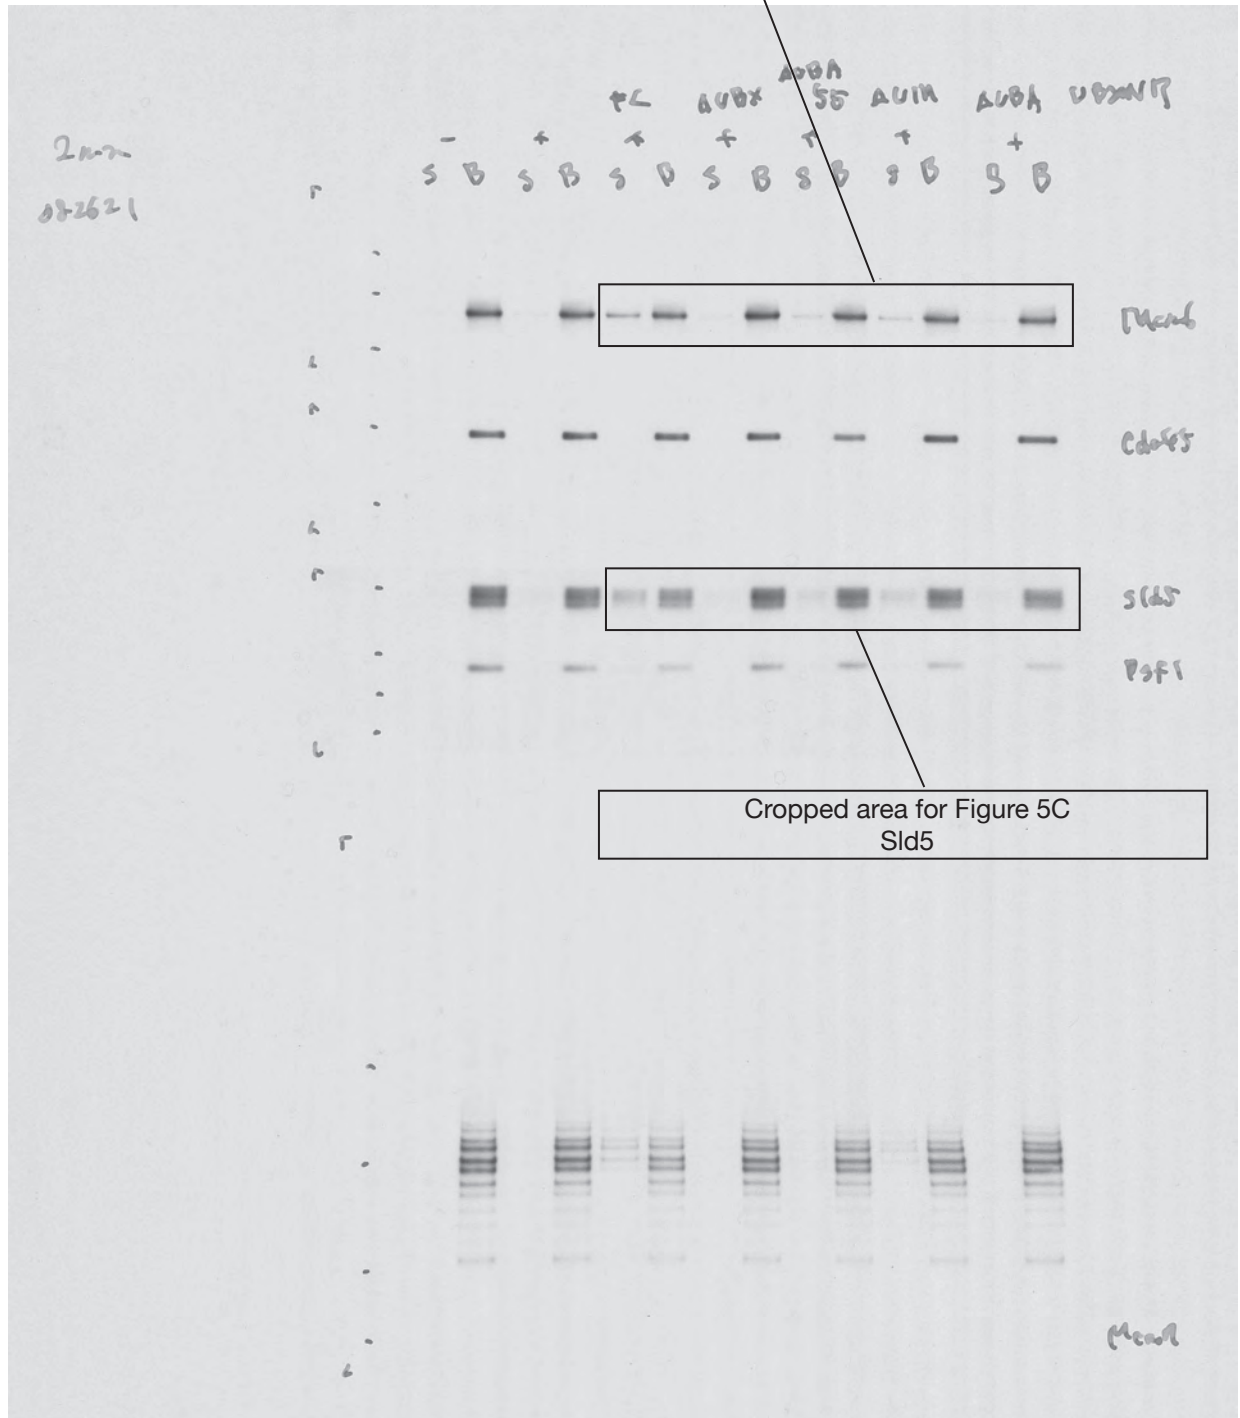

Cropped area for Figure 5E

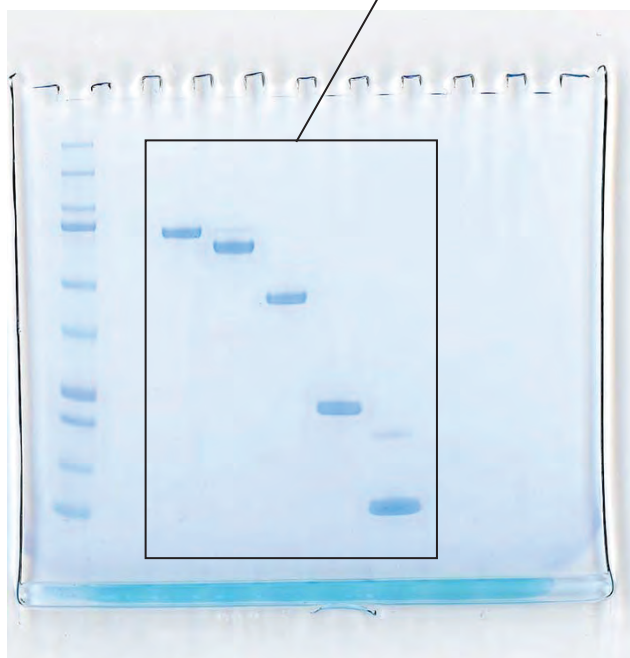

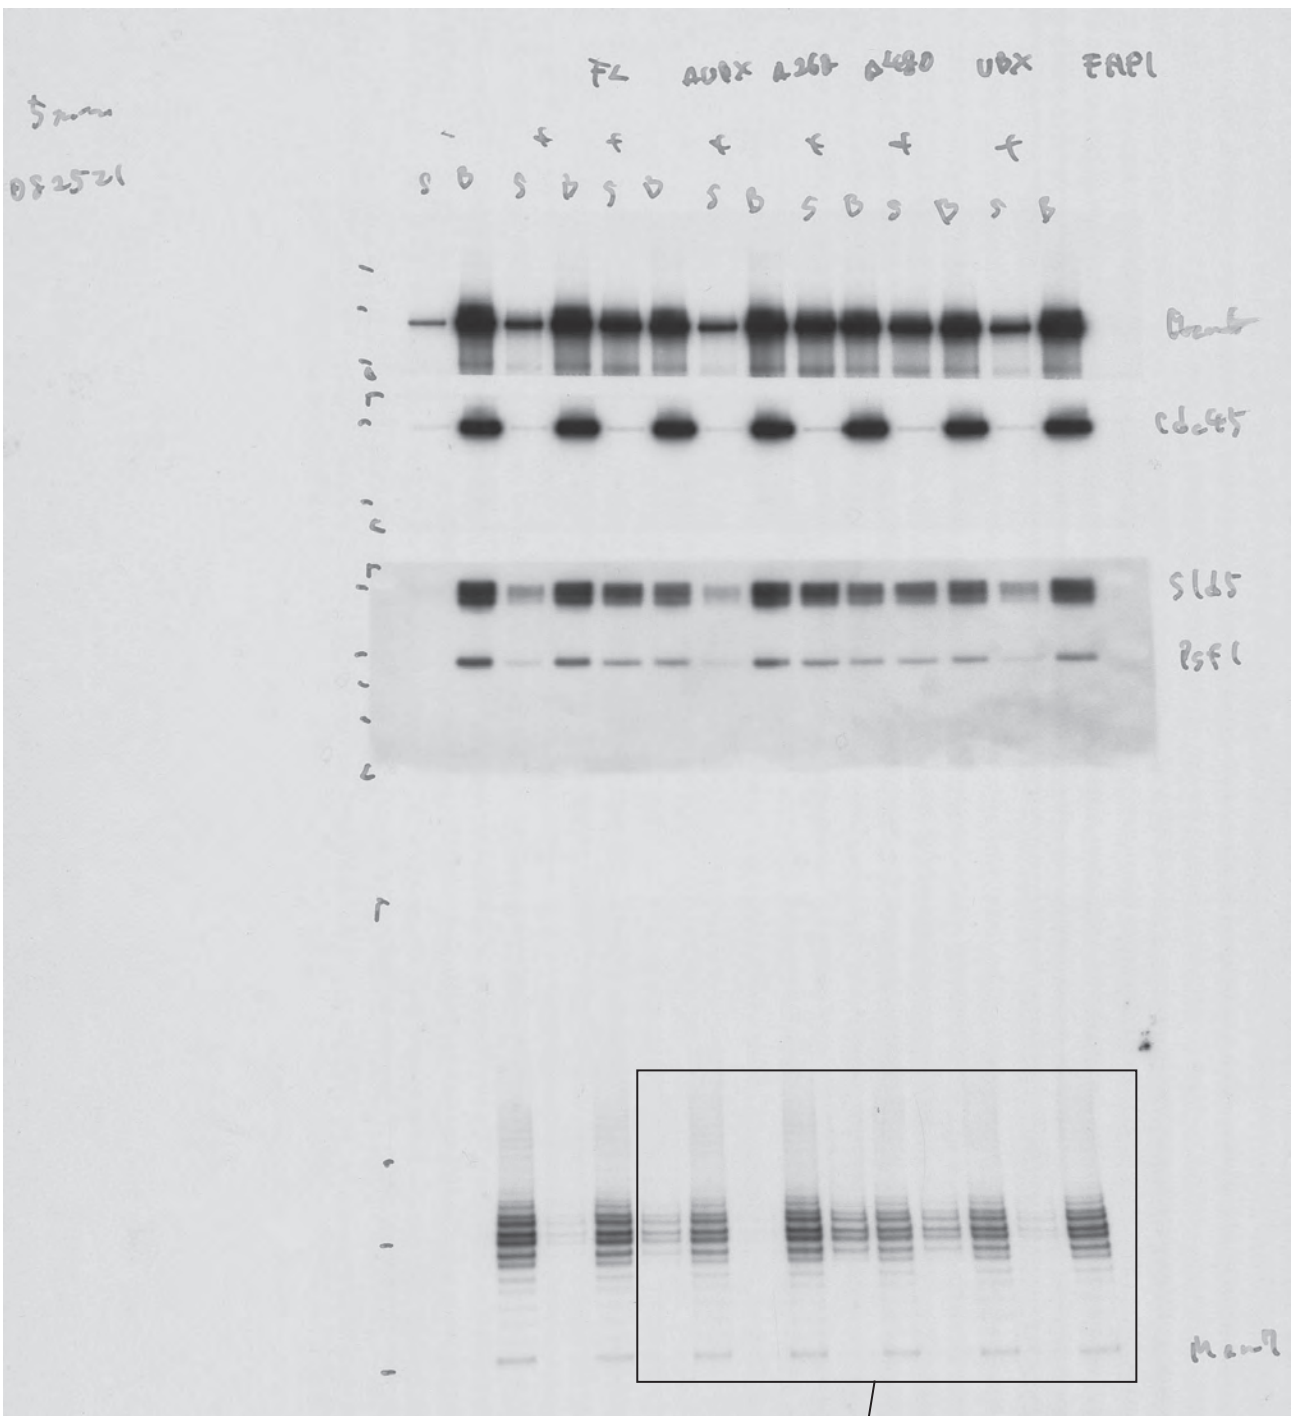

Cropped area for Figure 5F  
Mcm7

Cropped area for Figure 5F  
Mcm6

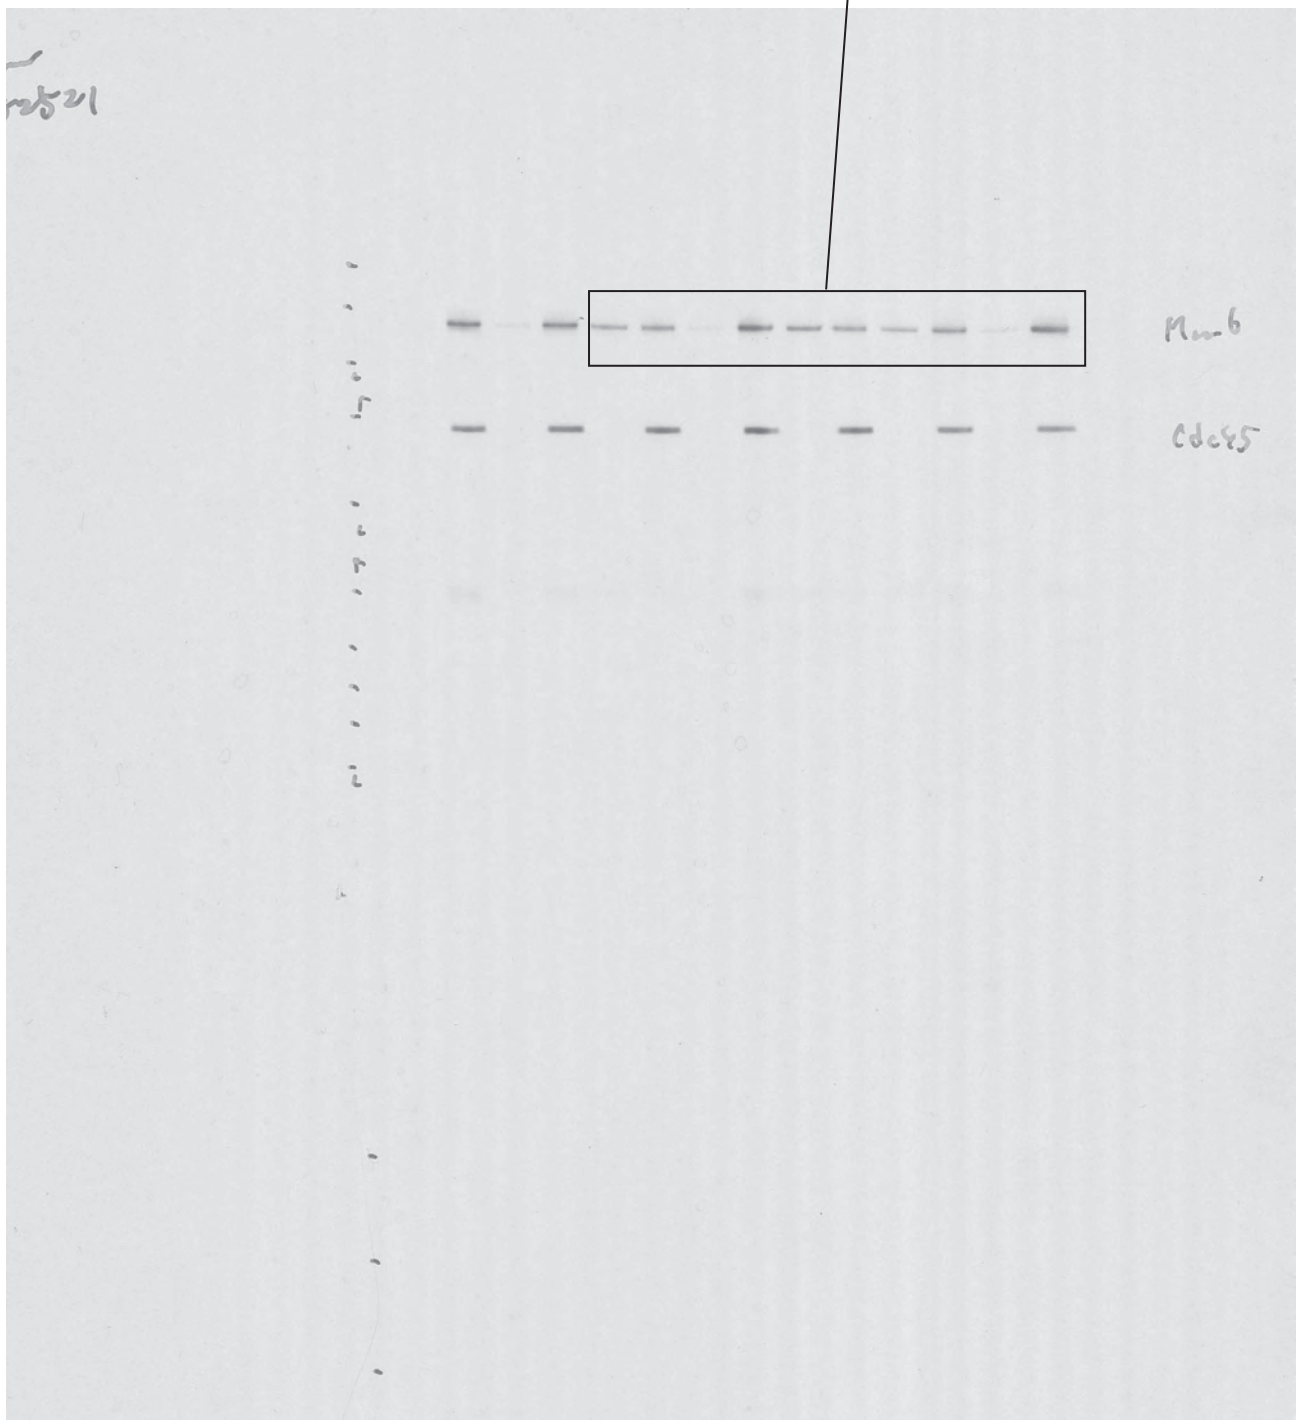

Cropped area for Figure 5F  
Cdc45

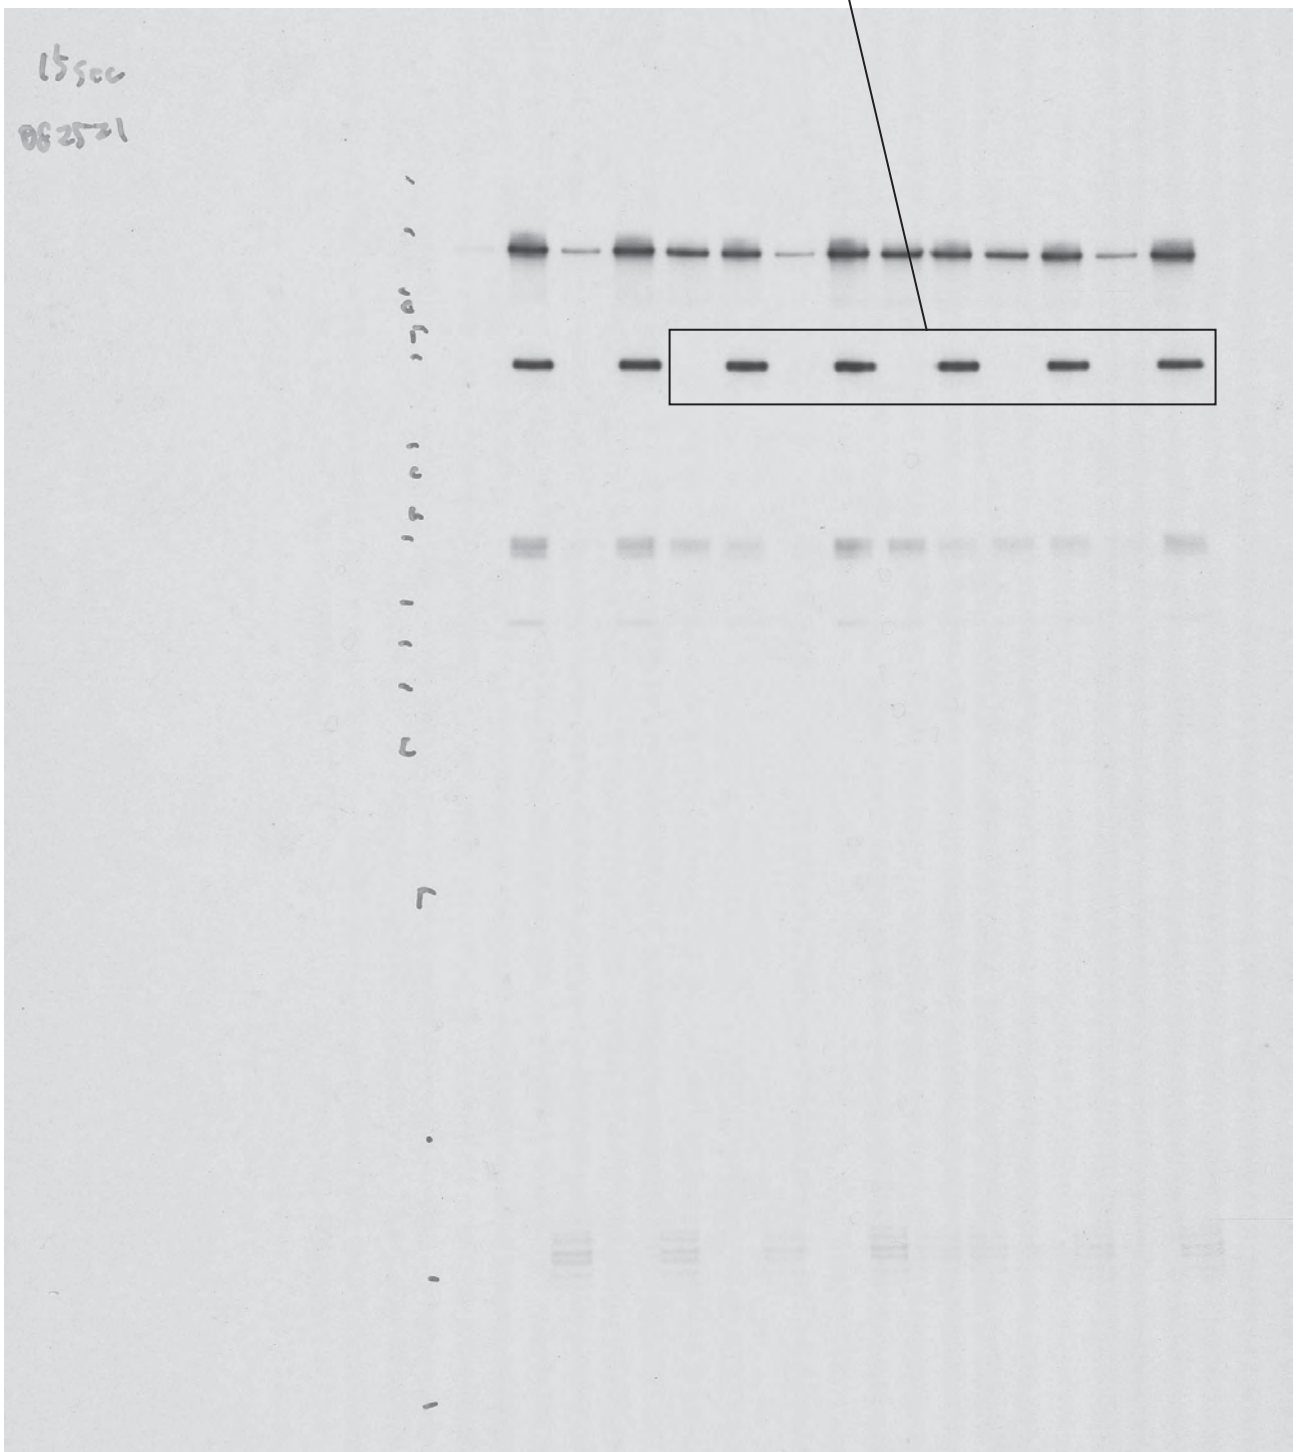

Cropped area for Figure 5F  
Sld5

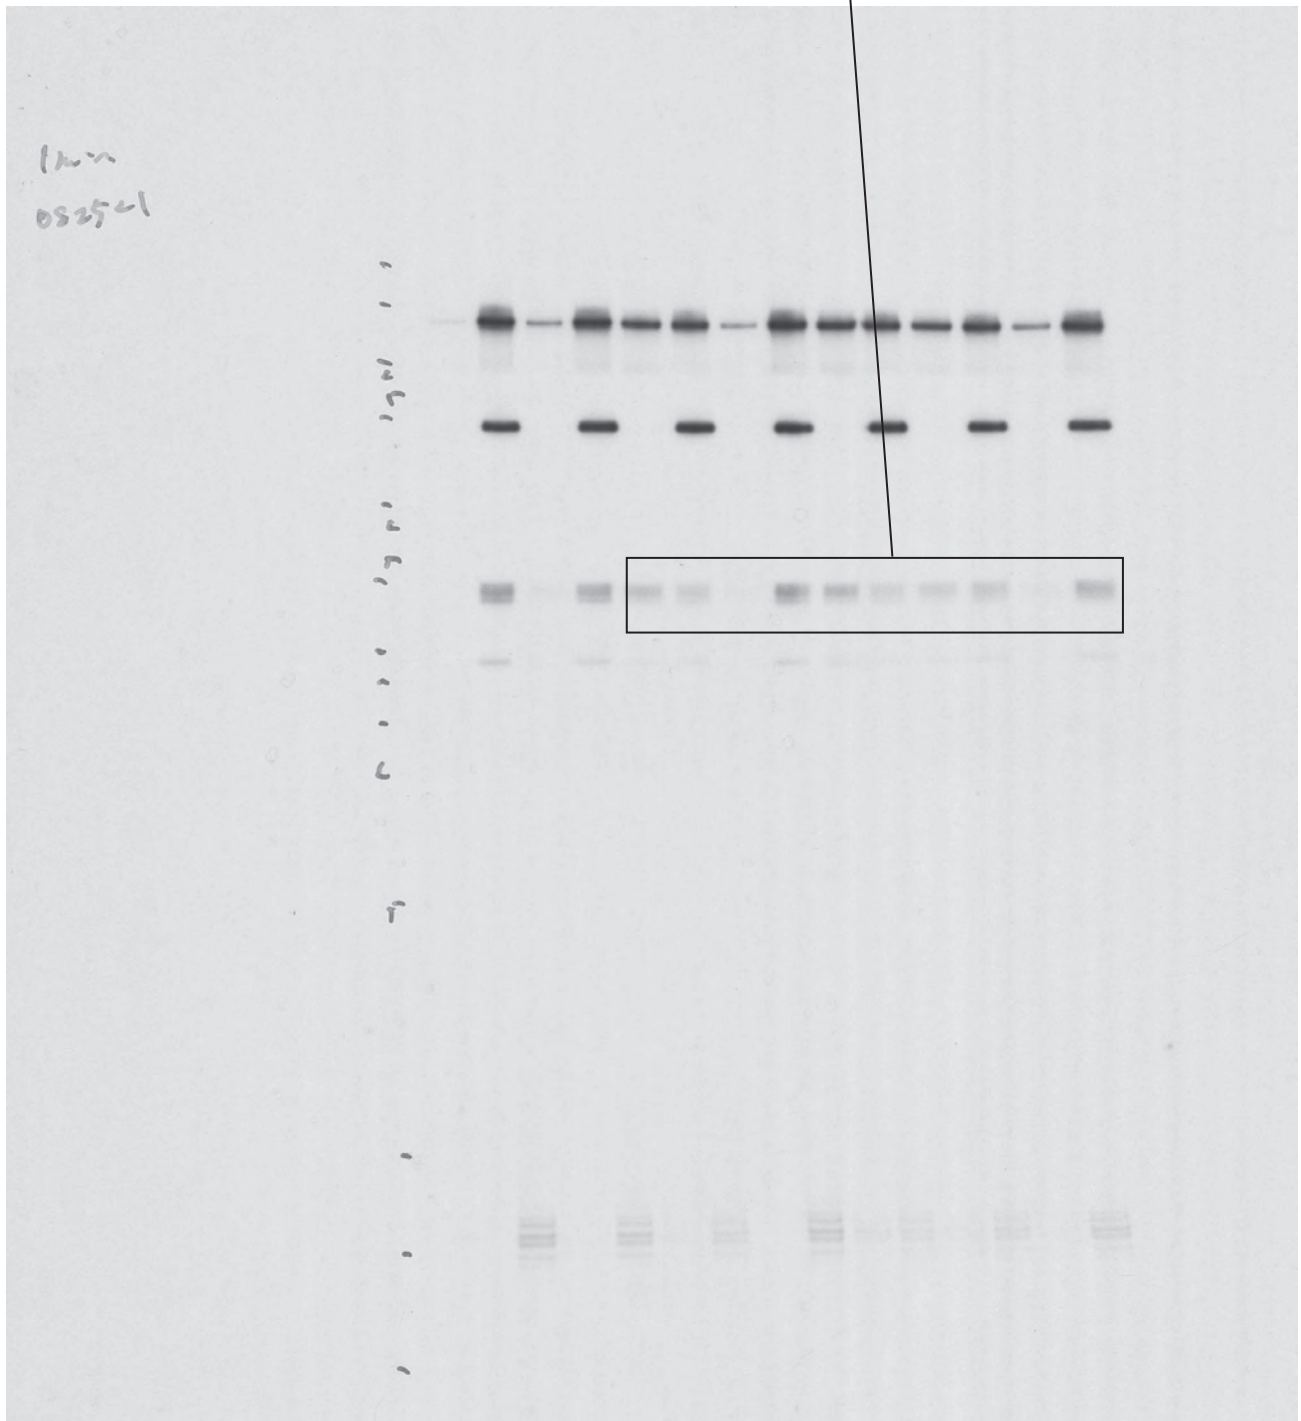

Cropped area for Figure 5H

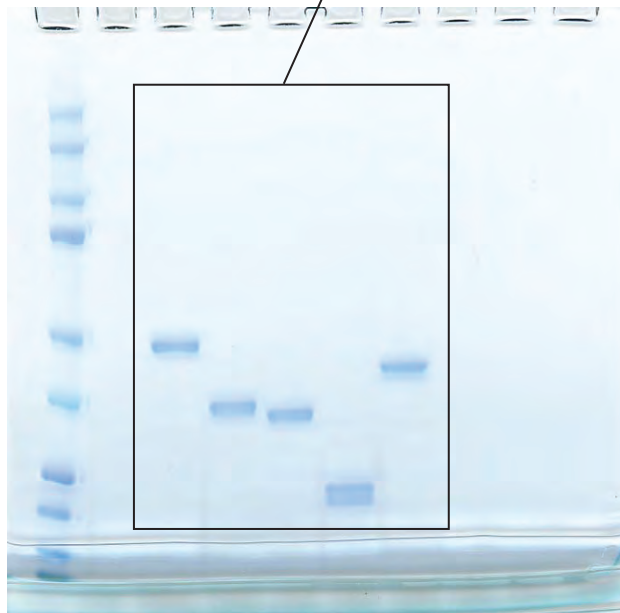

Cropped area for Figure 5I  
Cdc45

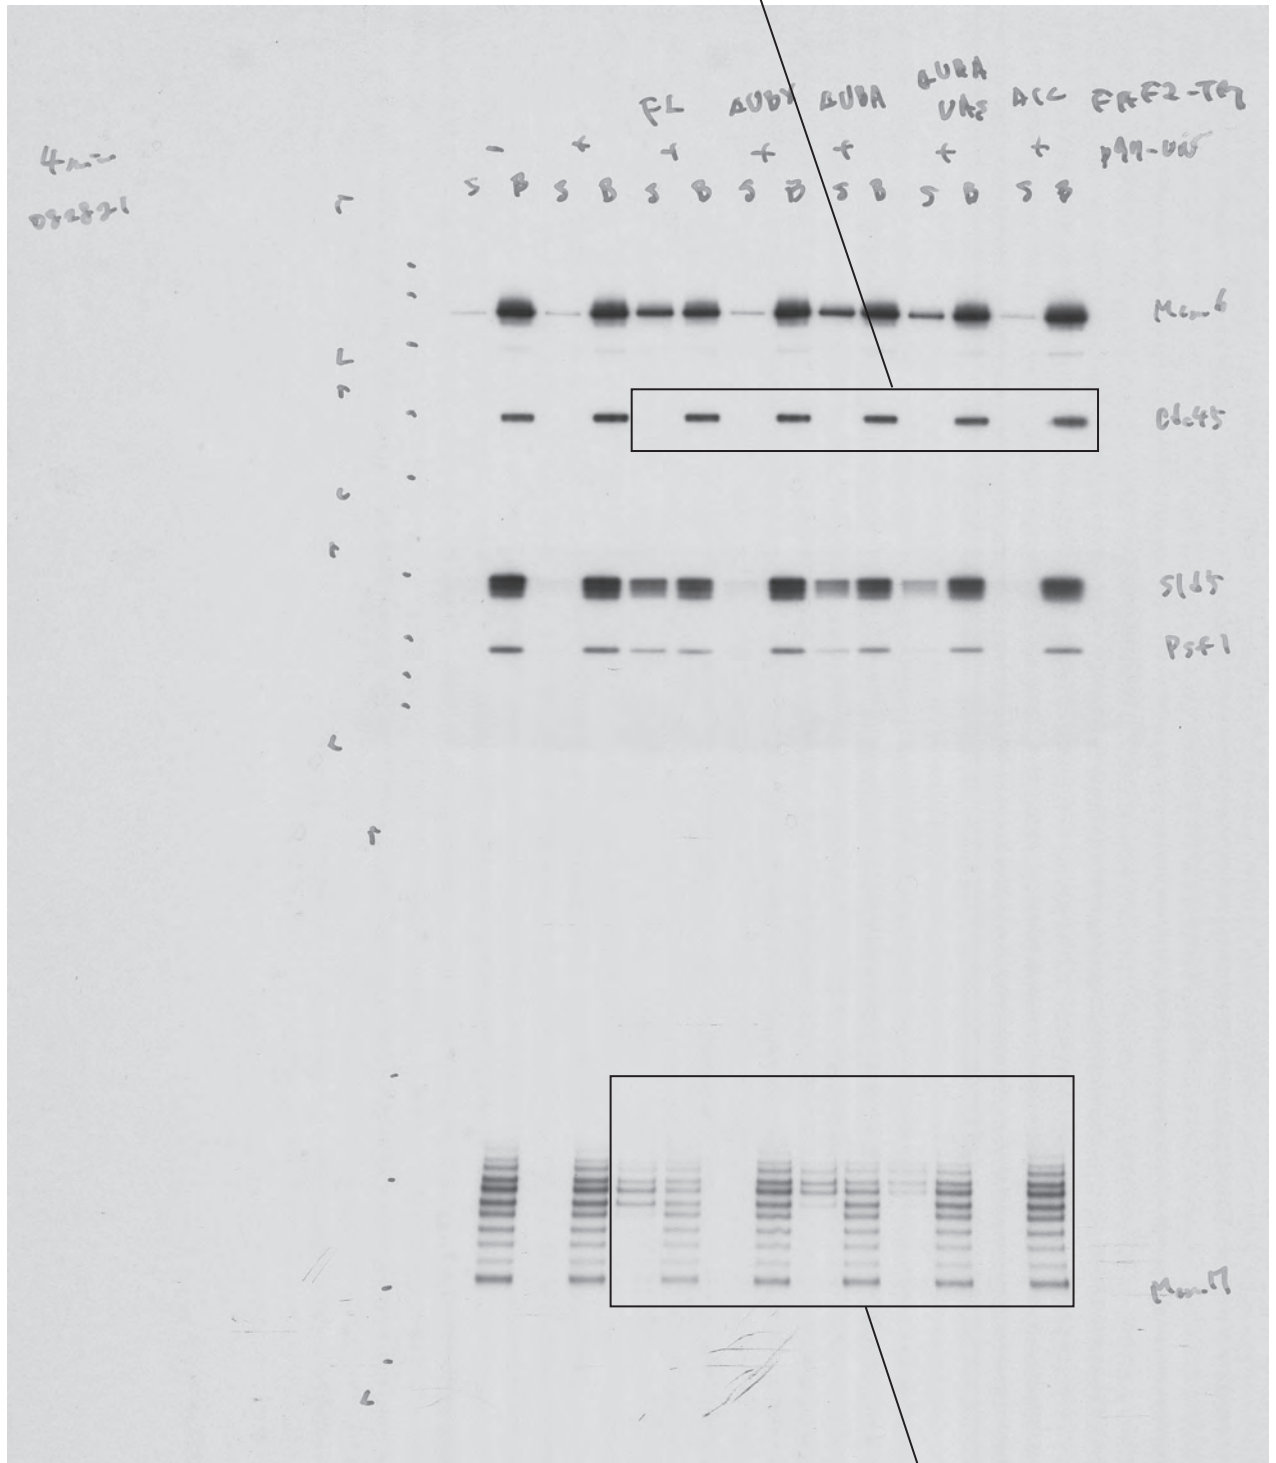

Cropped area for Figure 5I  
Mcm7

Cropped area for Figure 5I  
Mcm6

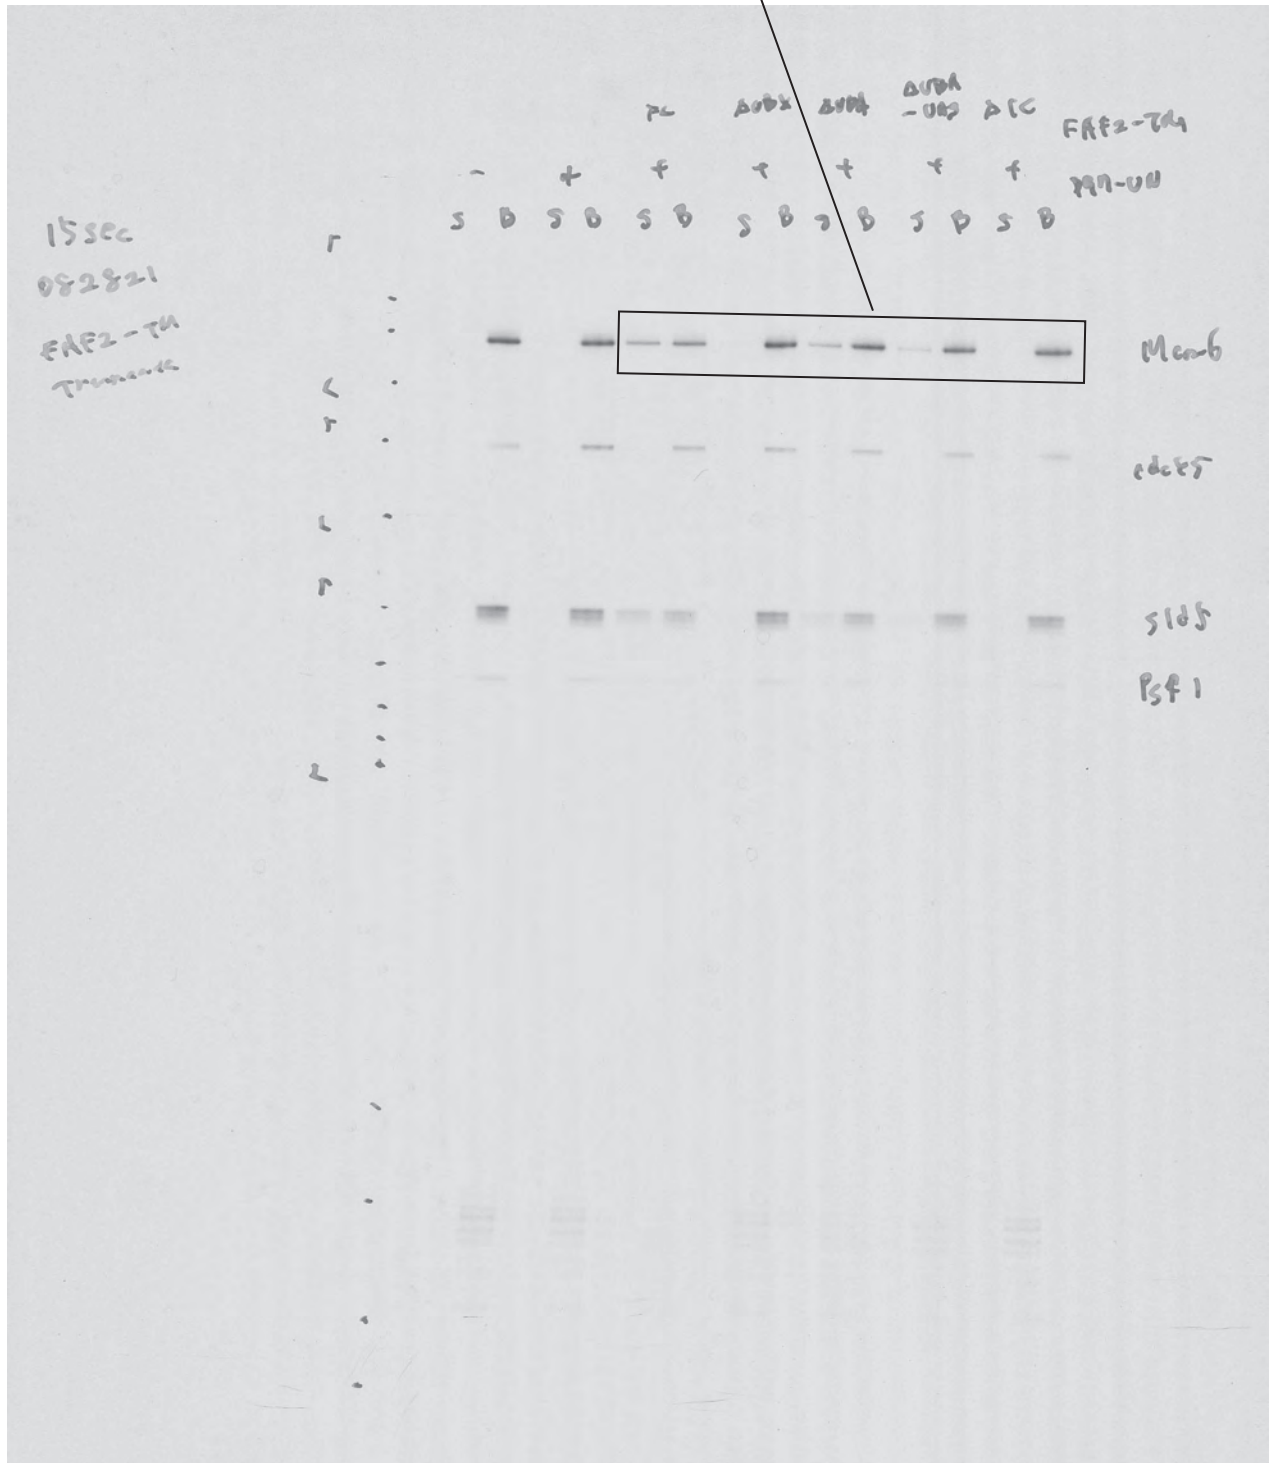

Cropped area for Figure 5I  
Sld5

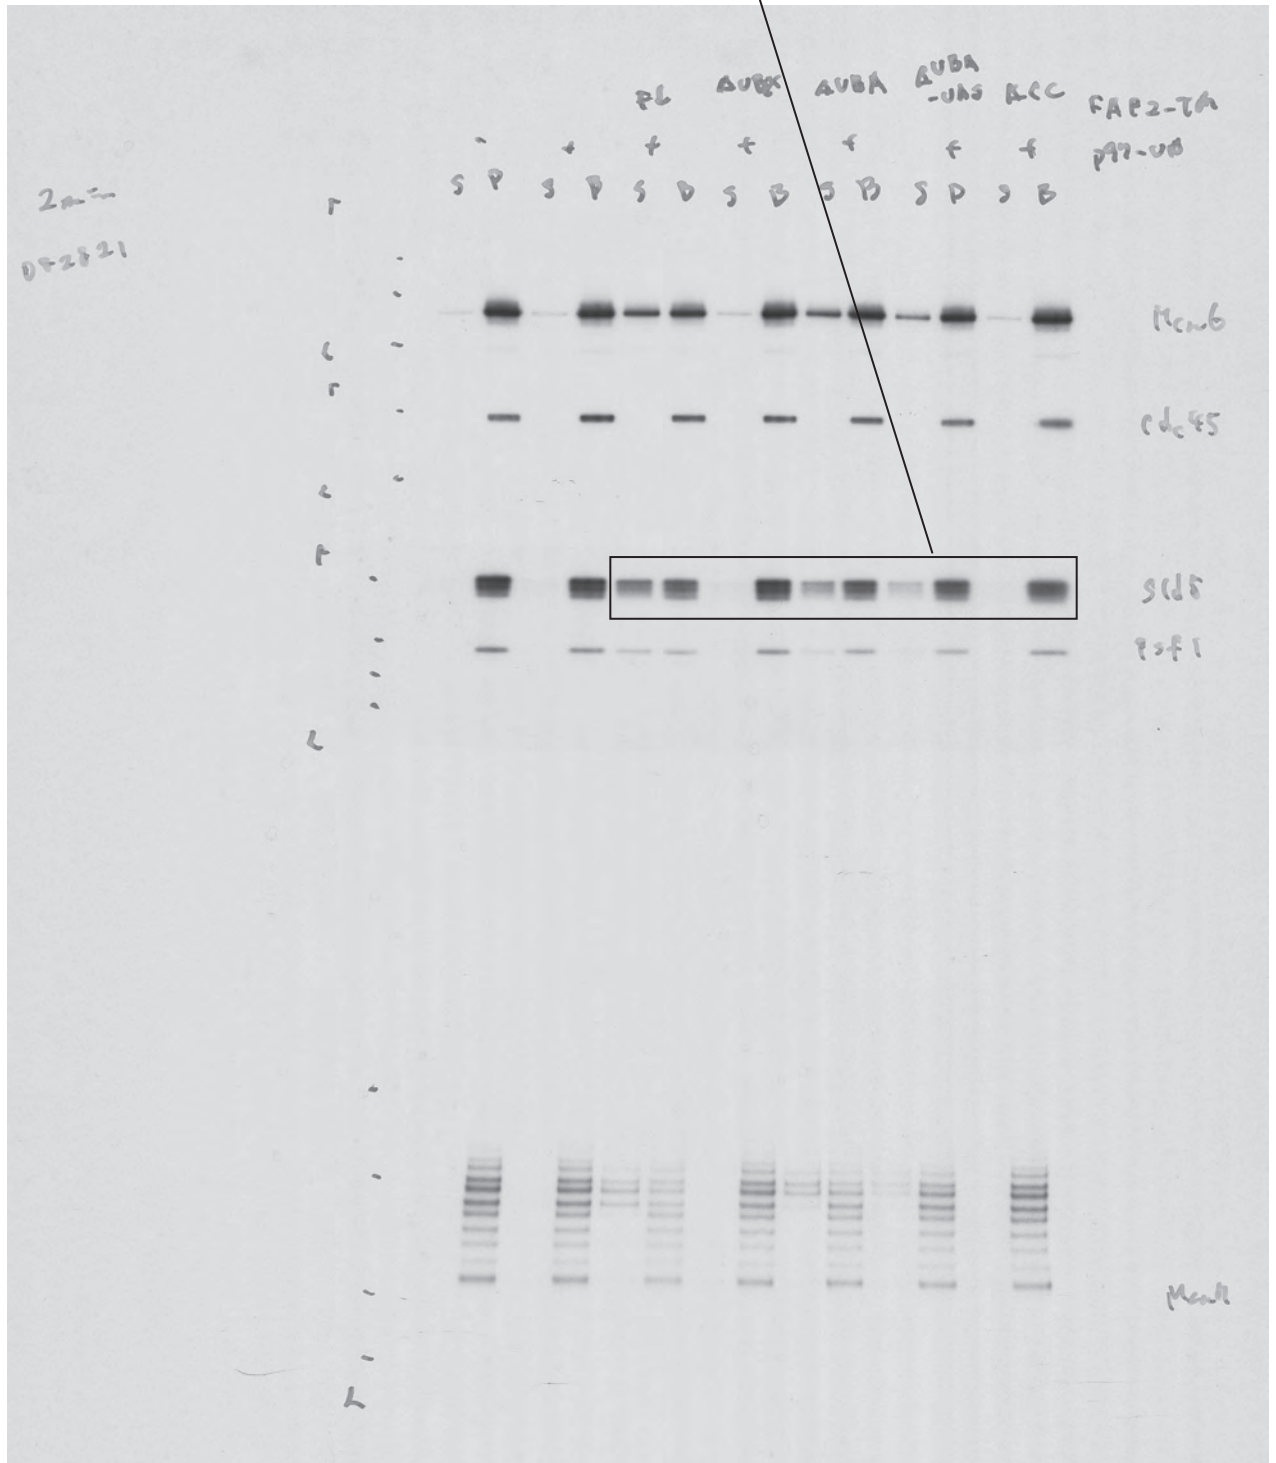

Supplement: Figure 5—source data 1. [file elife-76763-fig5-data1.pdf]
