# Supplementary material for: Multiple UBX proteins reduce the ubiquitin threshold of the mammalian p97-UFD1-NPL4 unfoldase
Source: eLife. 2022 Aug 3;11:e76763. doi: 10.7554/eLife.76763 (PMC9377798; doi:10.7554/eLife.76763)

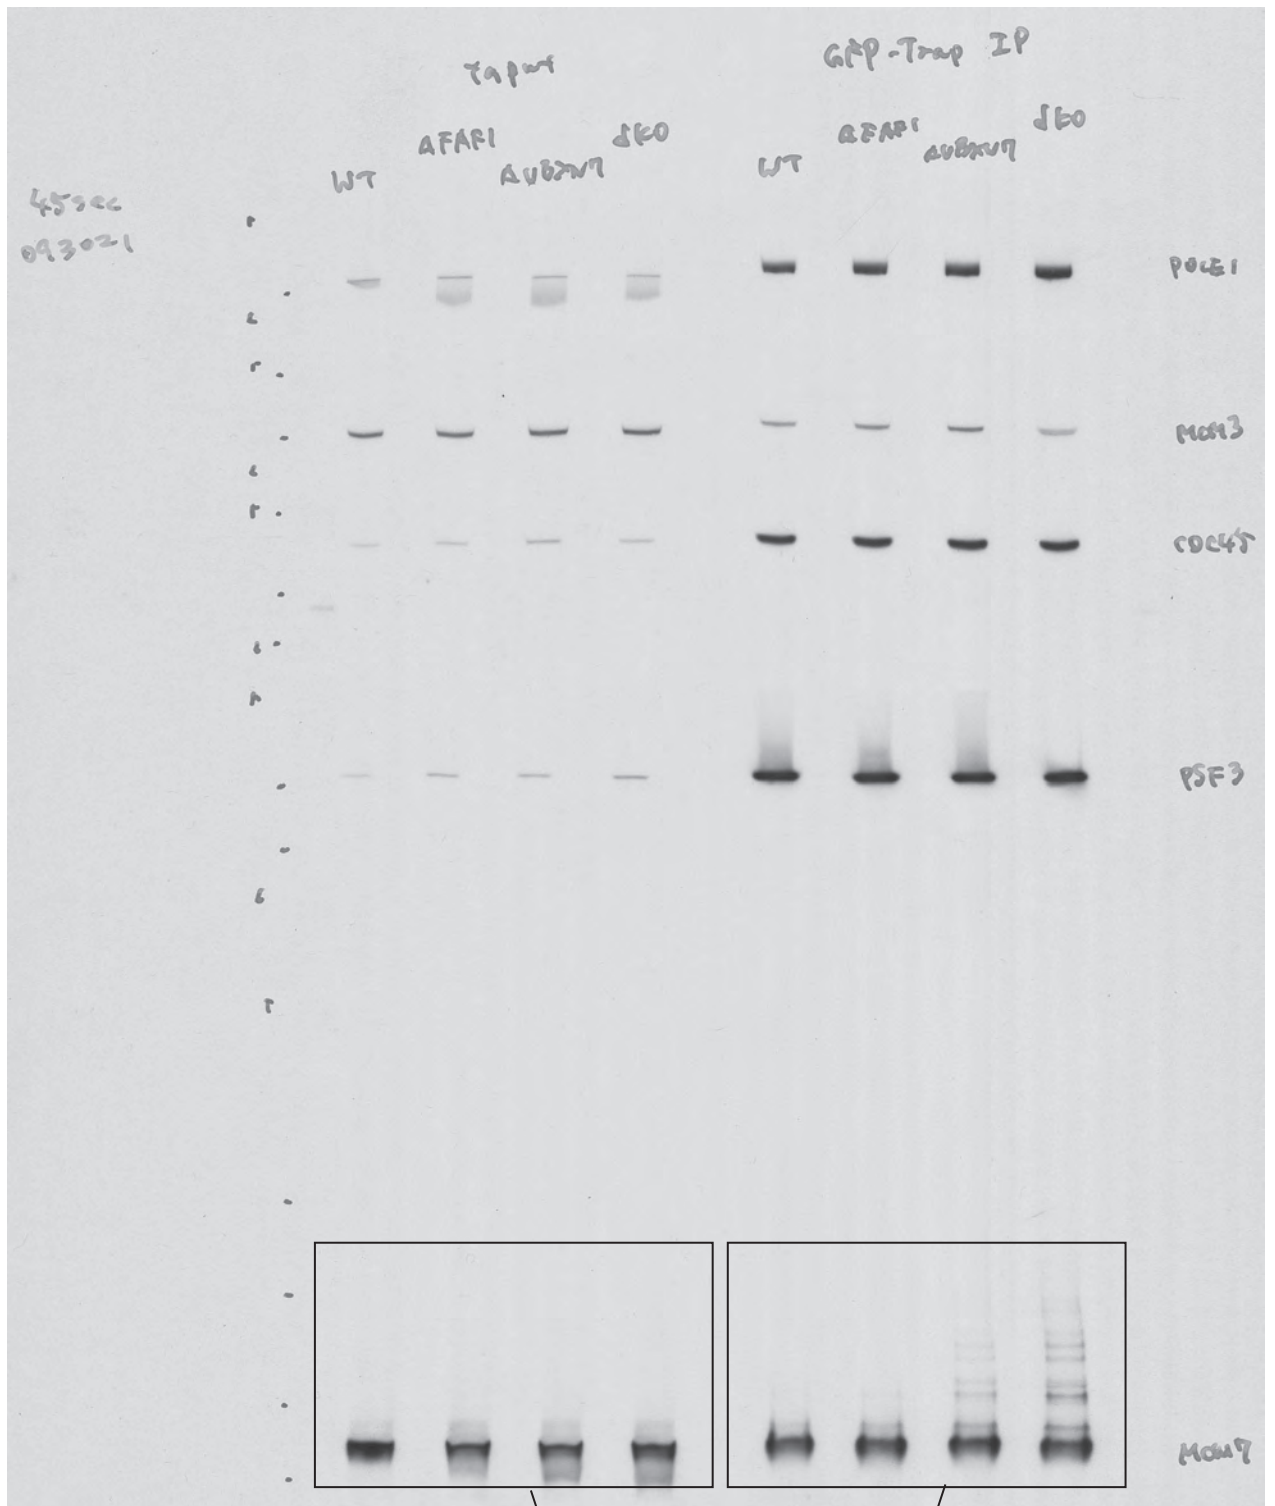

Cropped areas for Figure 6A  
MCM3

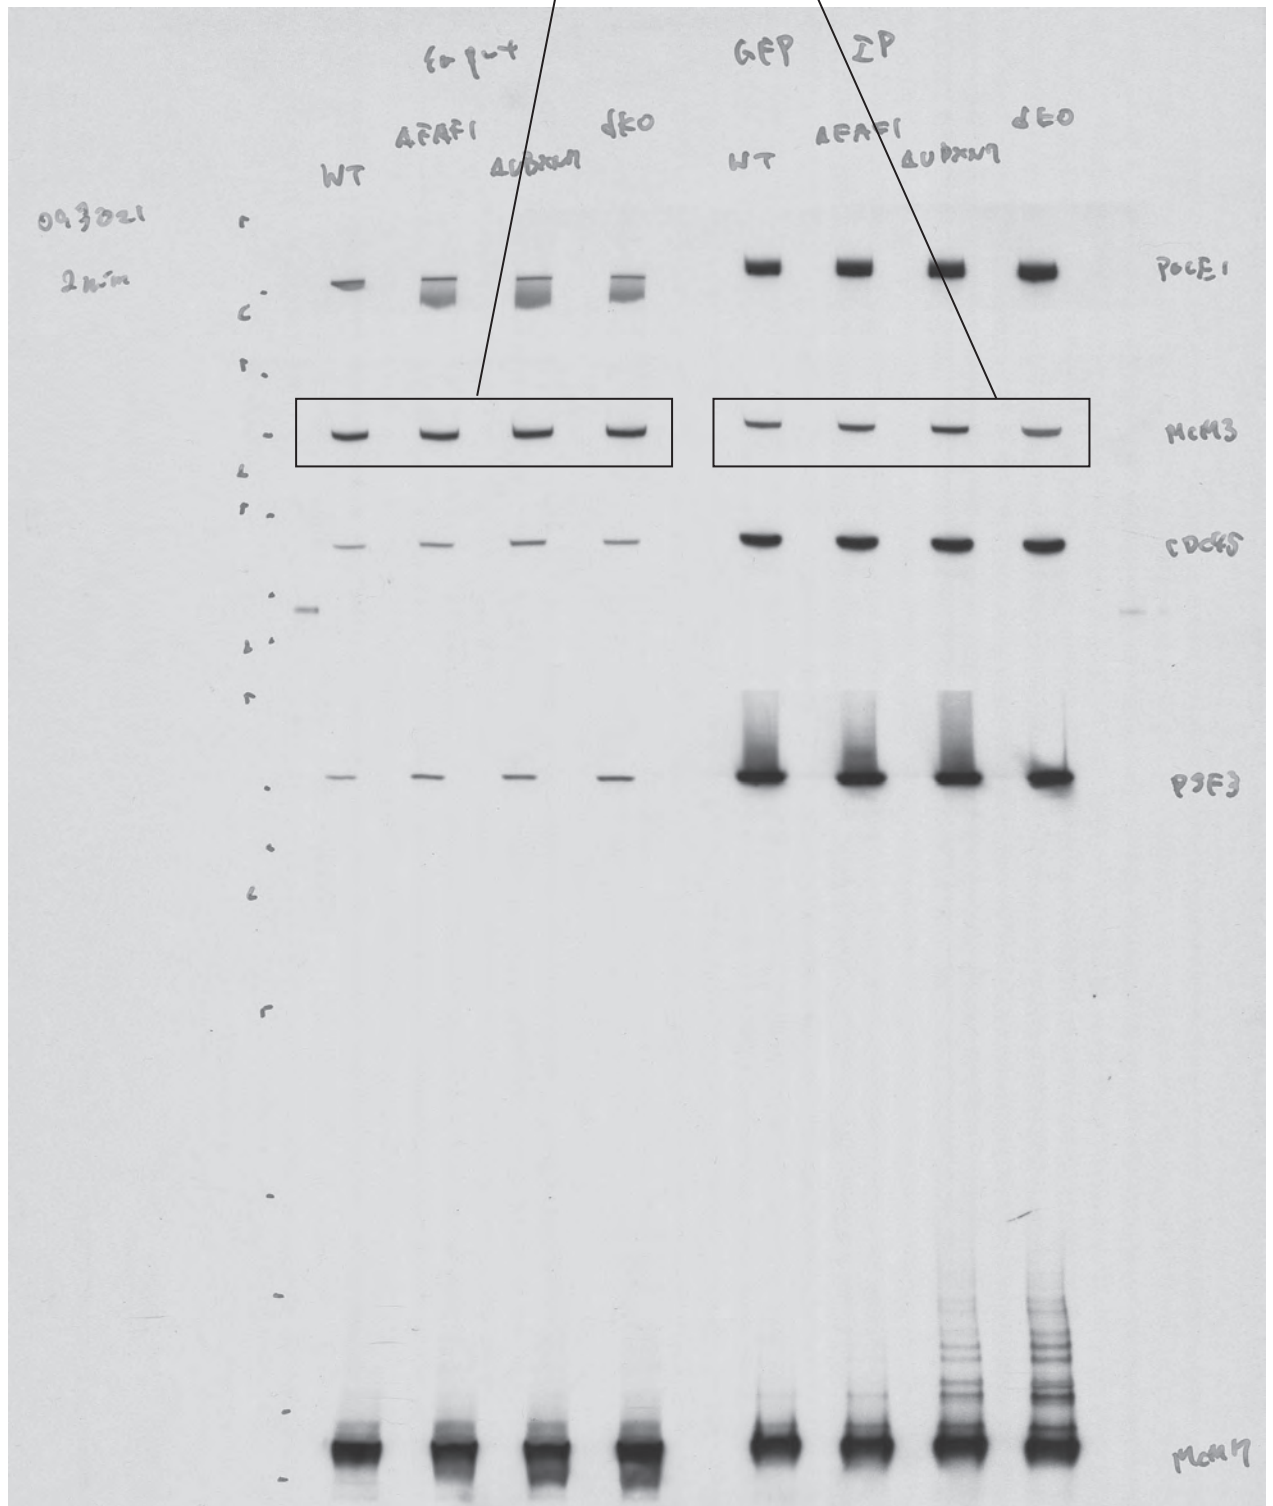

Cropped areas for Figure 6A  
CDC45

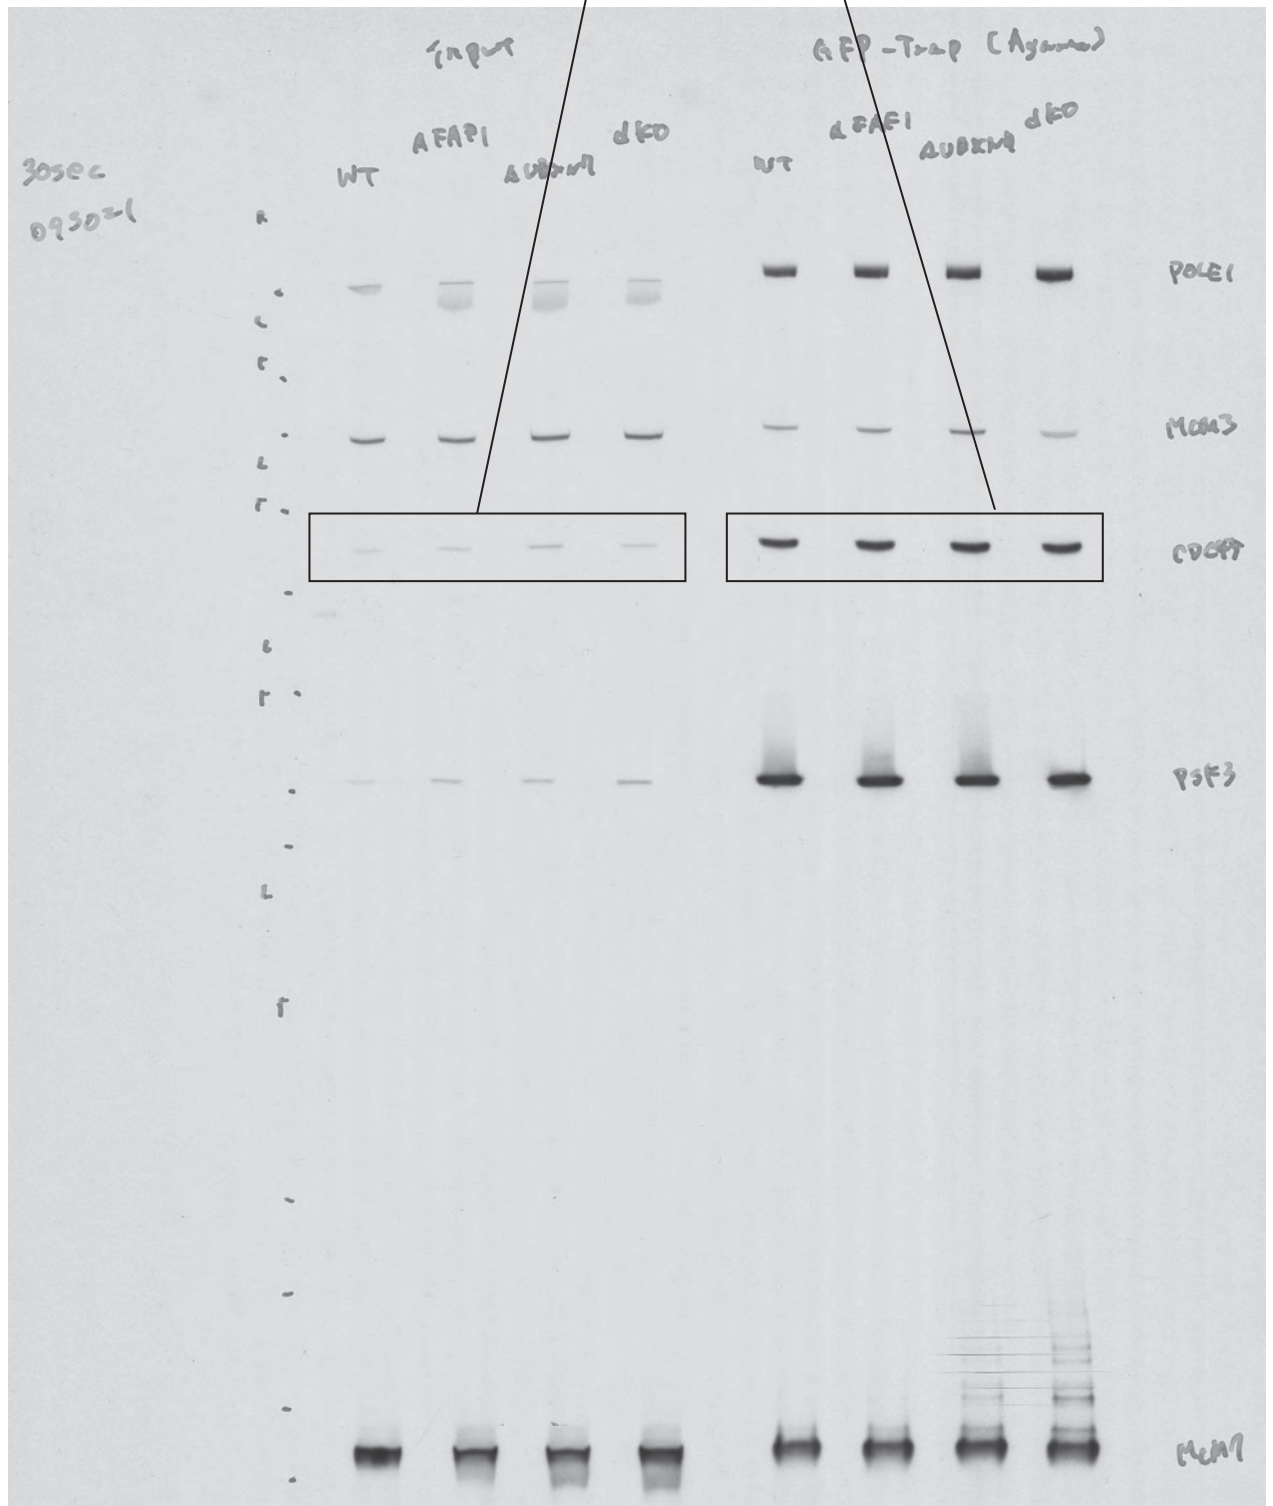

Cropped areas for Figure 6A  
PSF3

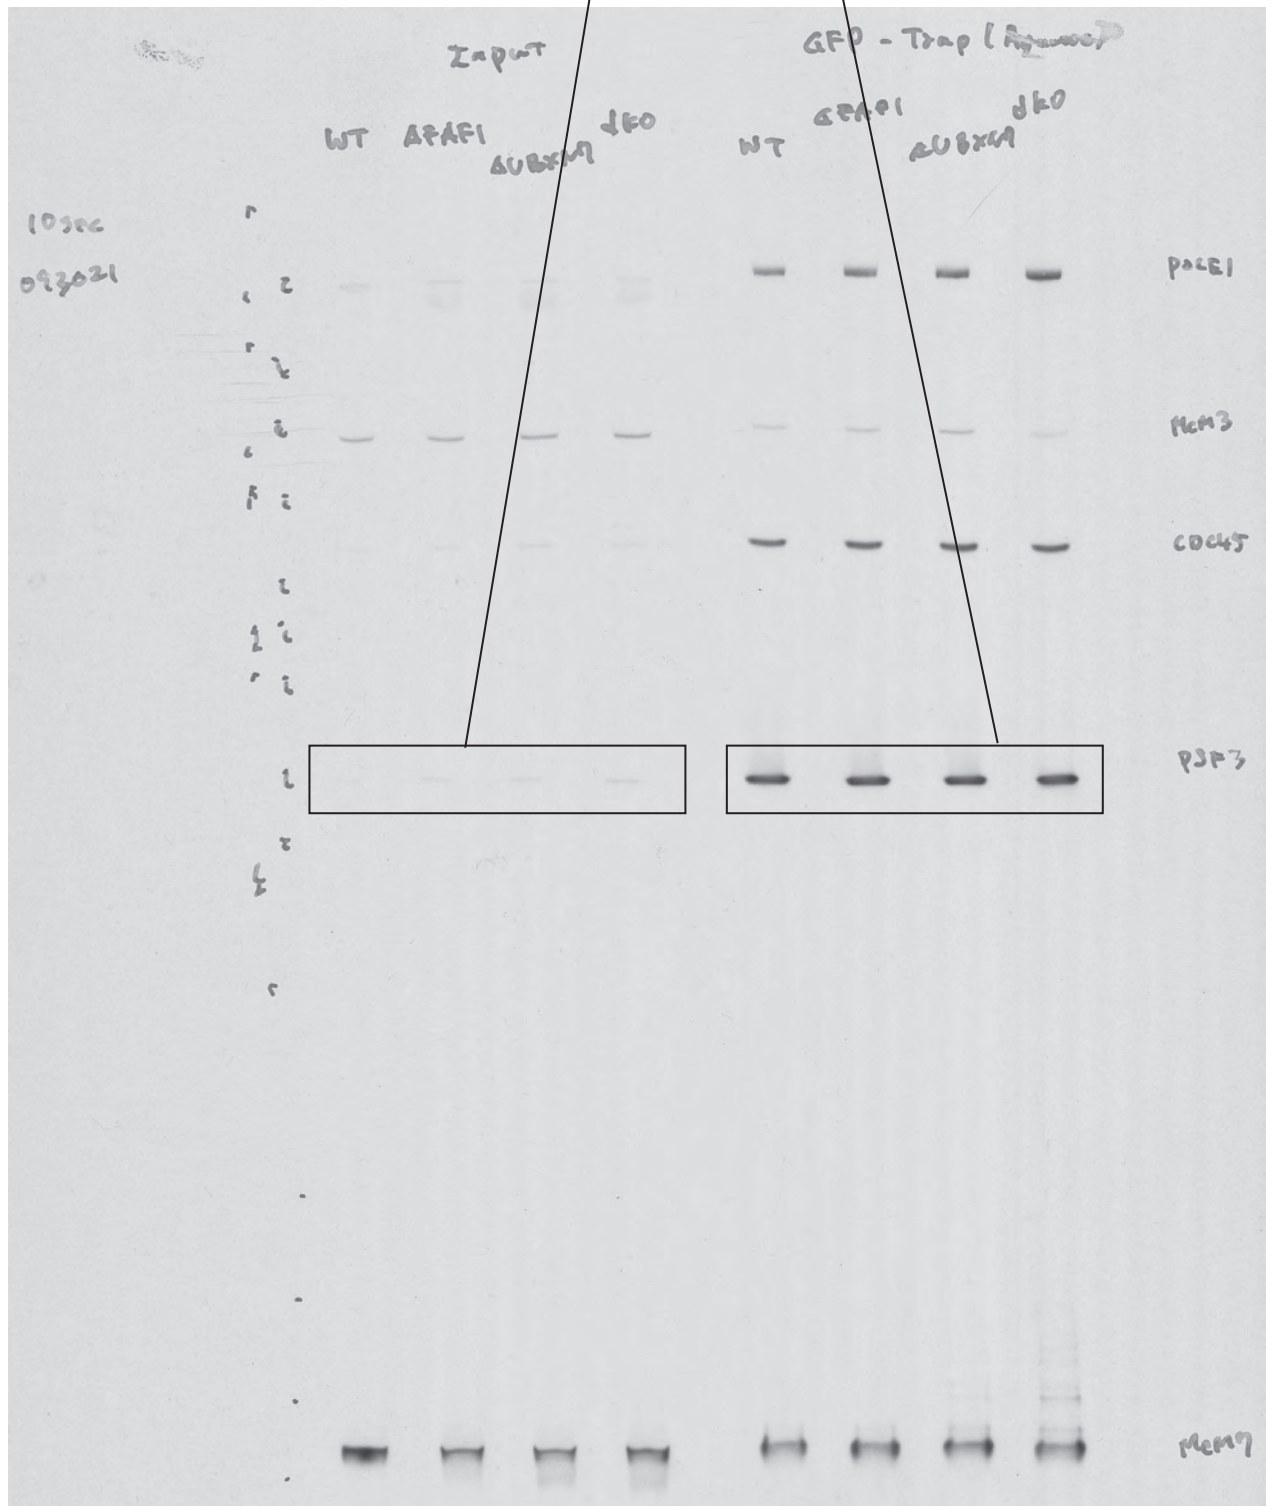

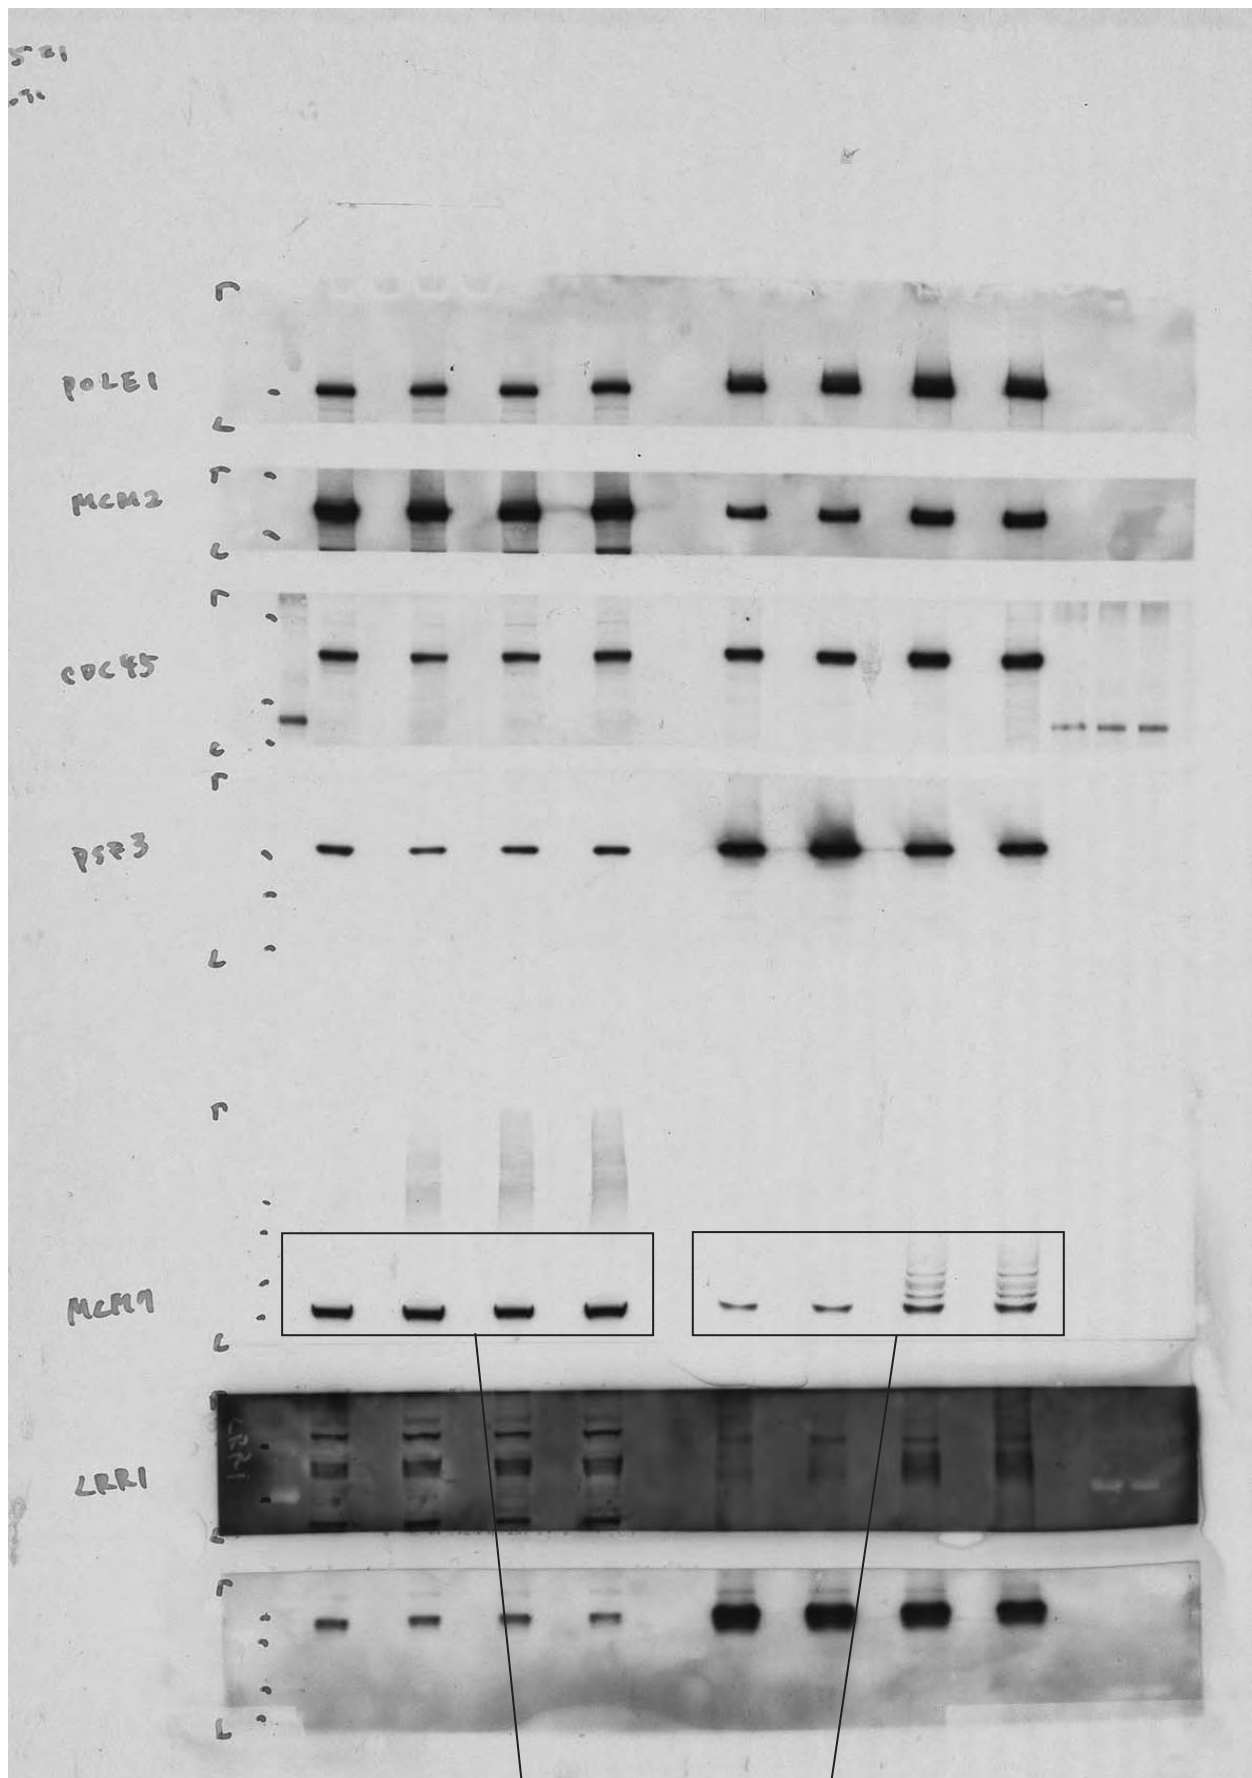

Cropped areas for Figure 6B  
MCM7 (short exposure)

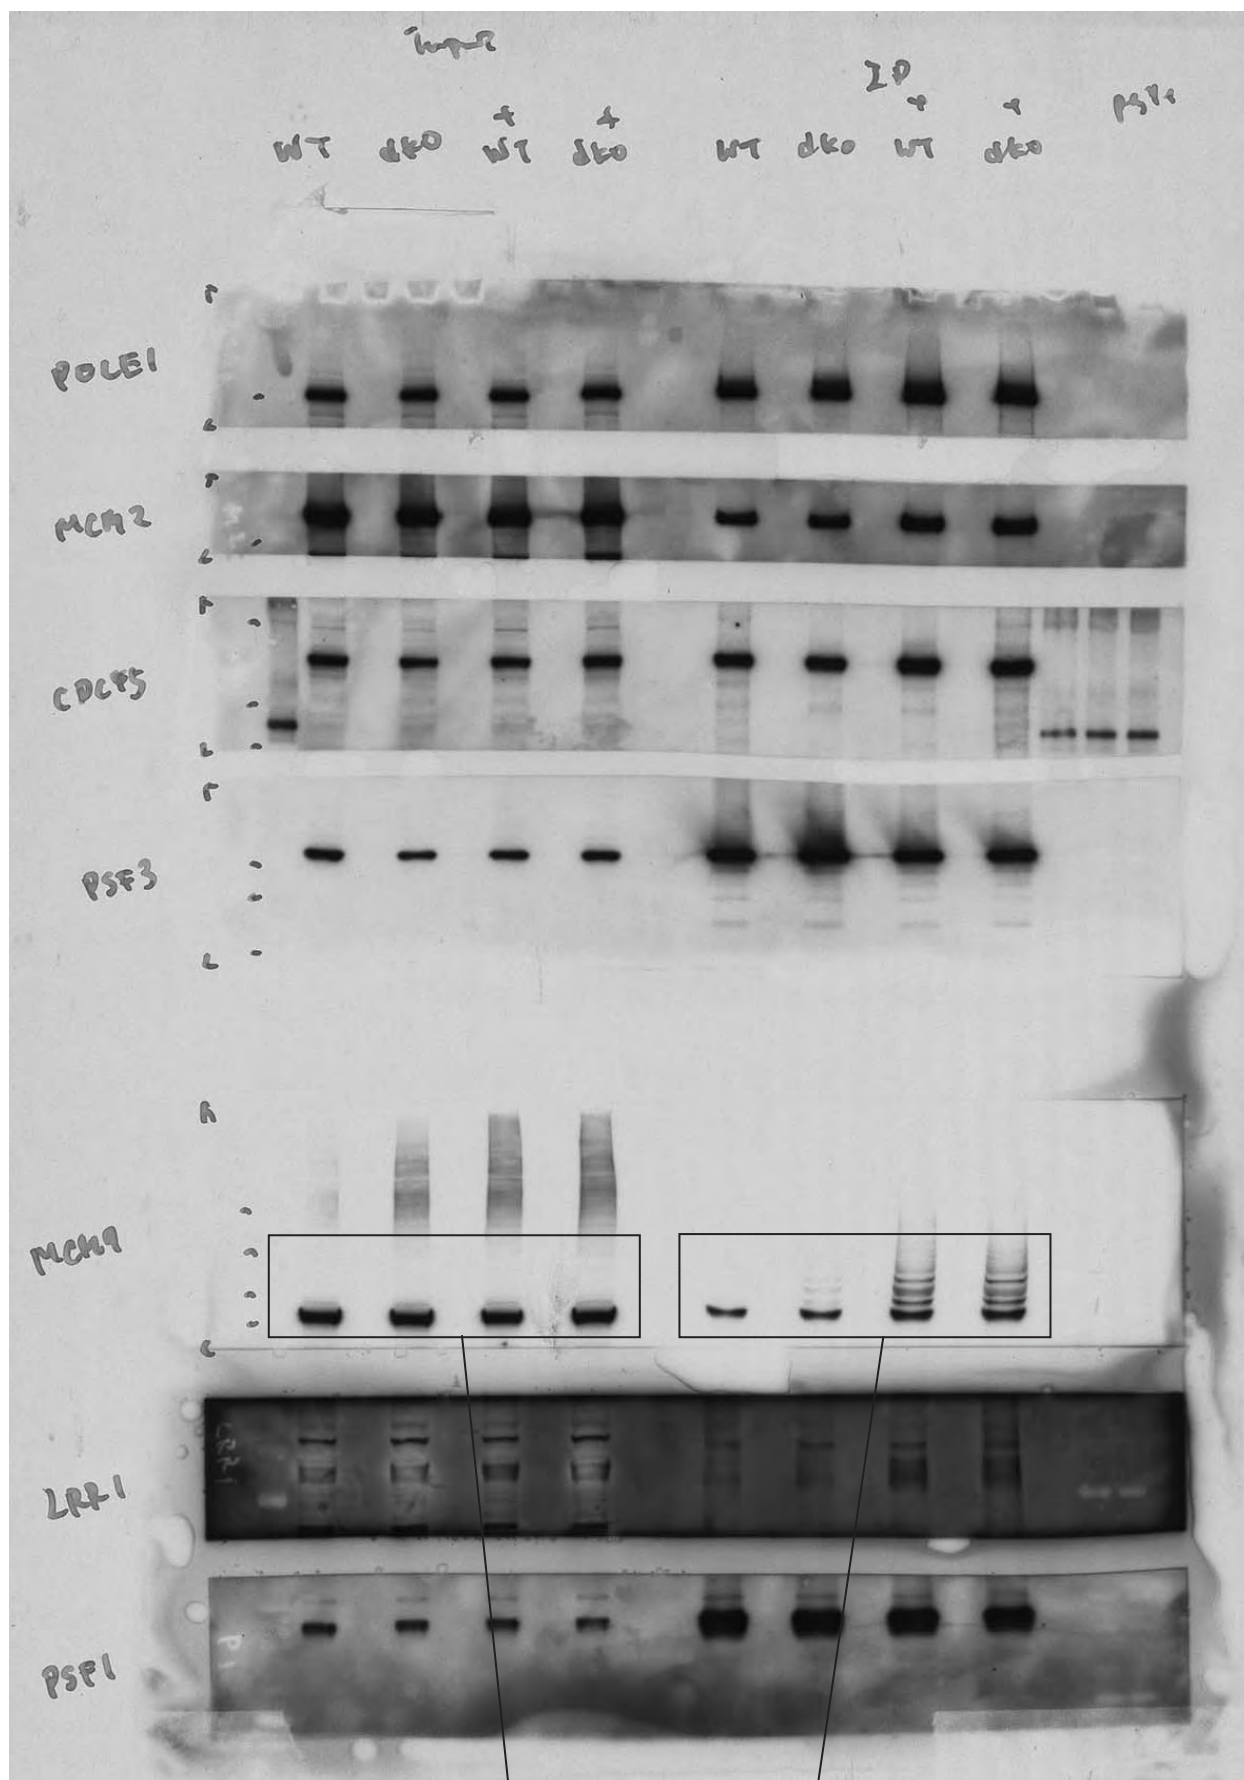

Cropped areas for Figure 6B  
MCM7 (long exposure)

-5

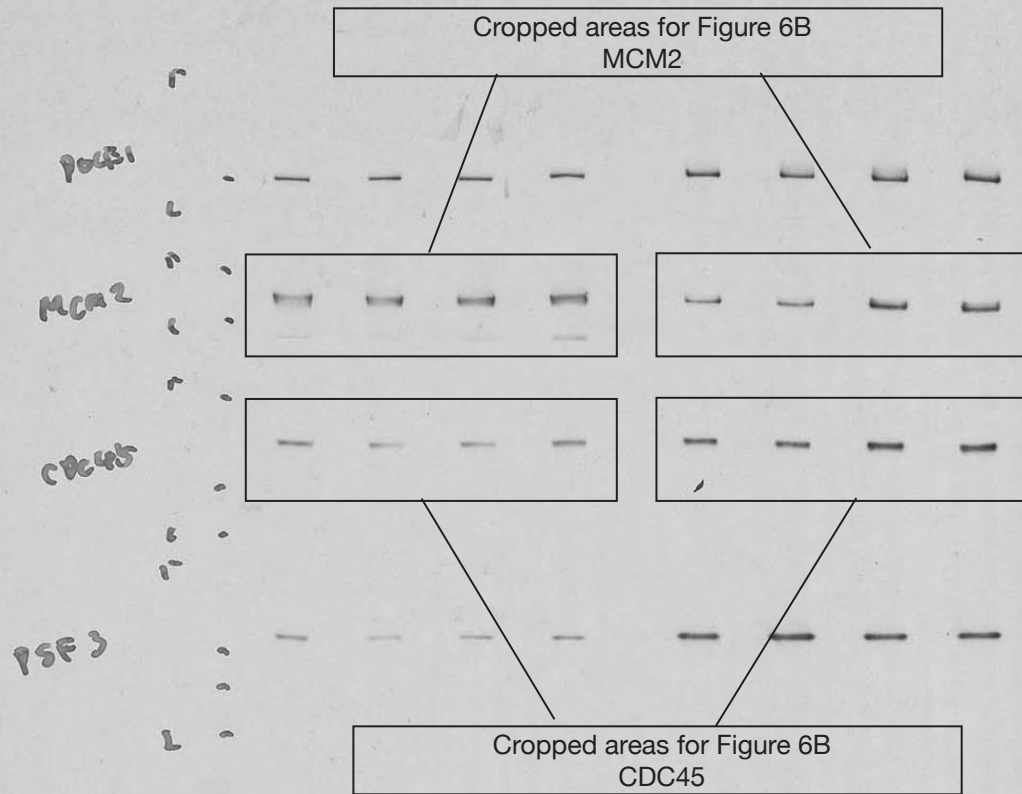

MCM7

LRR1

PSF1

r

r

r

r

r

r

r

r

21

١٠٢

2P

POLE!

MEM2

20245

PSF3

мсм?

2001

93E

Cropped areas for Figure 6B  
PSF3

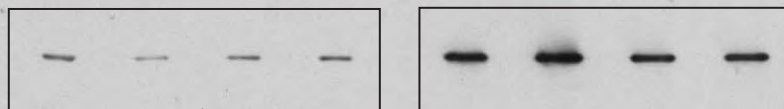

Supplement: Figure 6—source data 1. [file elife-76763-fig6-data1.pdf]
