# Supplementary material for: Multiple UBX proteins reduce the ubiquitin threshold of the mammalian p97-UFD1-NPL4 unfoldase
Source: eLife journal article supplement (doi:10.7554/elife.76763), 2022-08-03
Supplement: supp [file elife-76763-supp-v1.zip]

04/05/22

1min

Cropped area for Figure 2-figure supplement 3A  
Mcm7

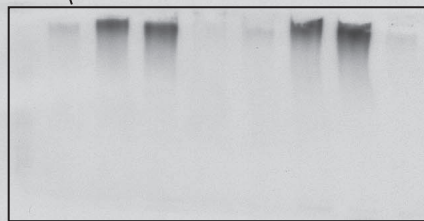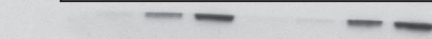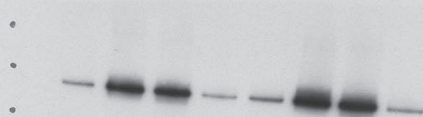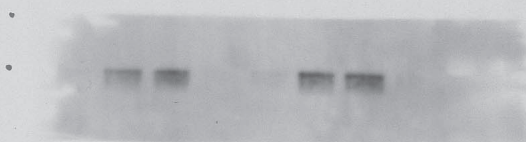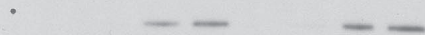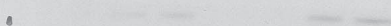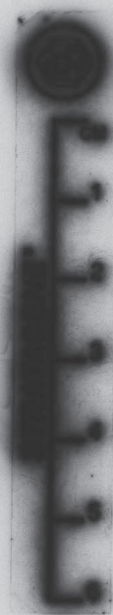

04/05/22

20 sec

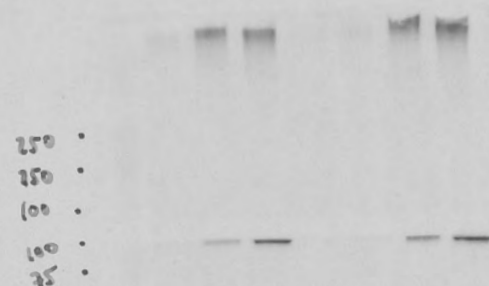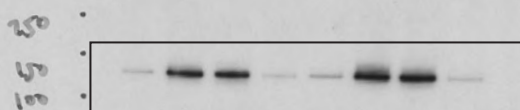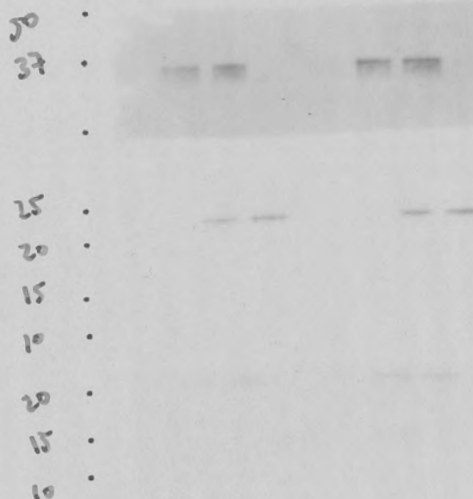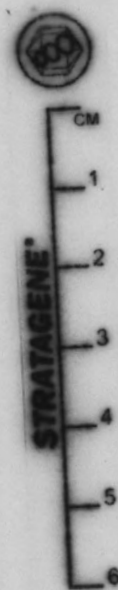

Cropped area for Figure 2-figure supplement 3A  
Mcm6

Cropped area for Figure 2-figure supplement 3A  
Cdc45

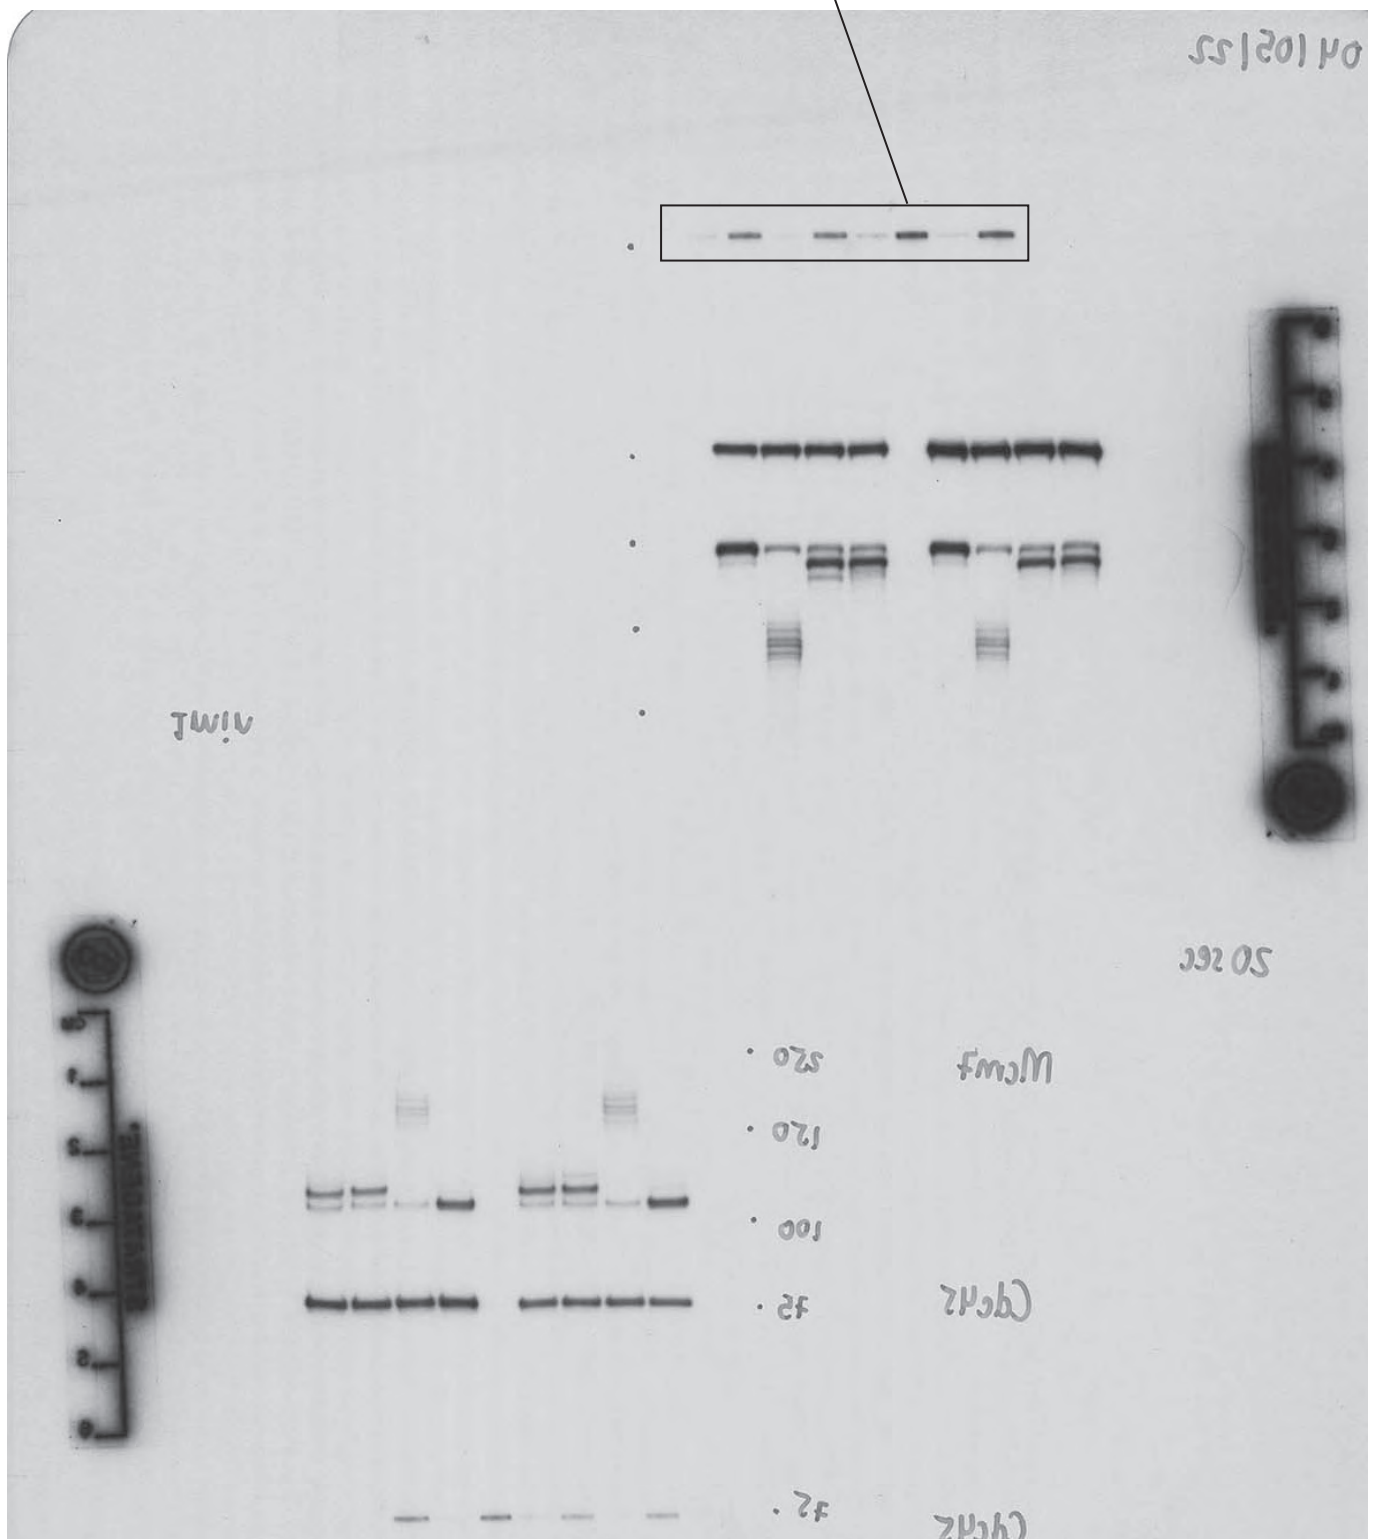

04/05/22

4 min

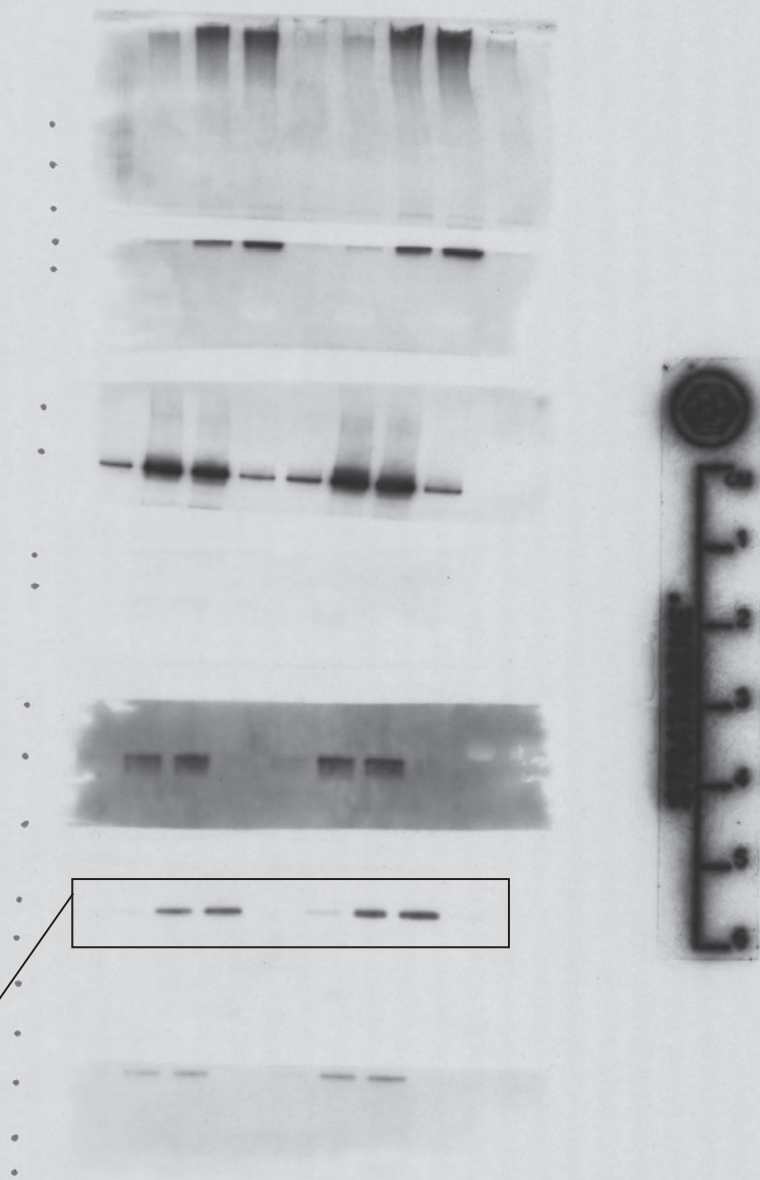

Cropped area for Figure 2-figure supplement 3A  
Psf1



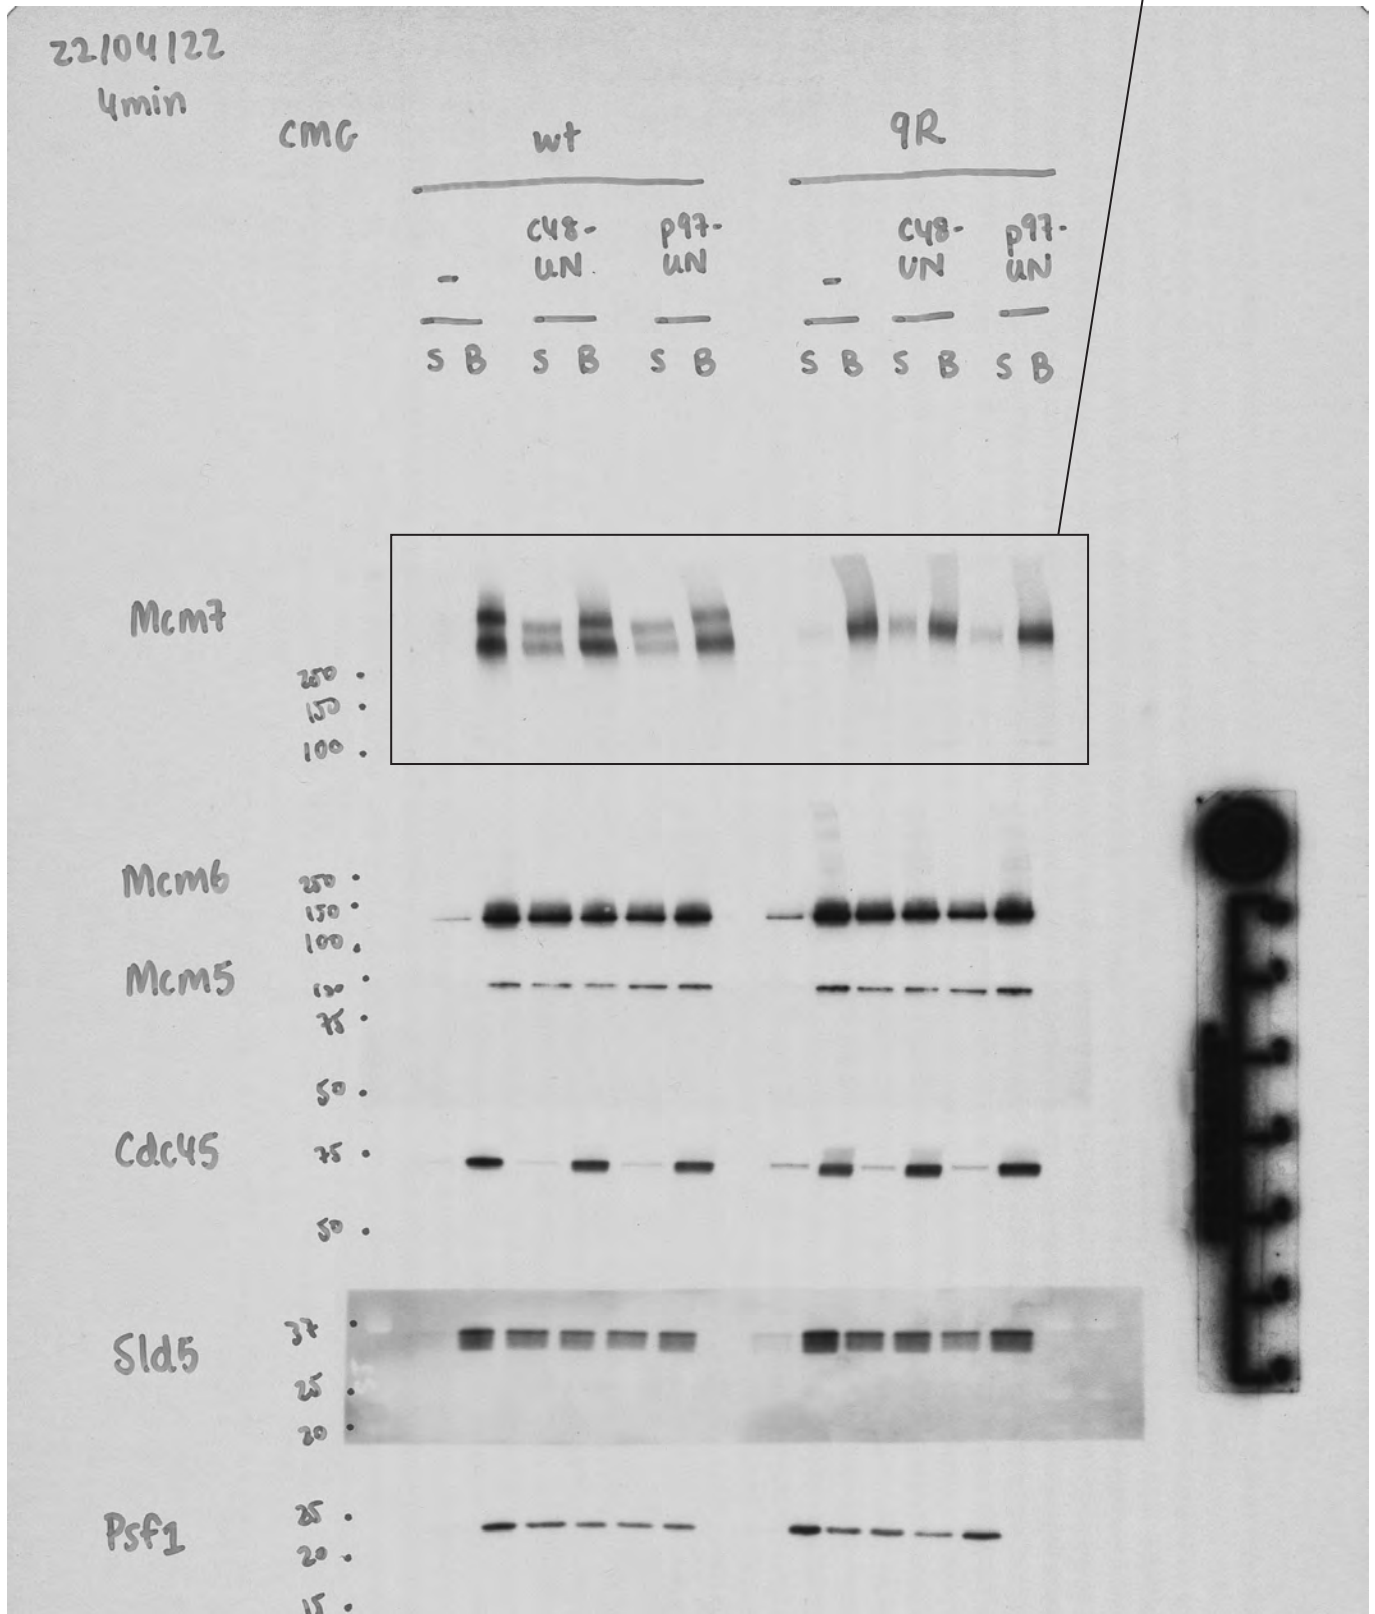

22/04/22

1min

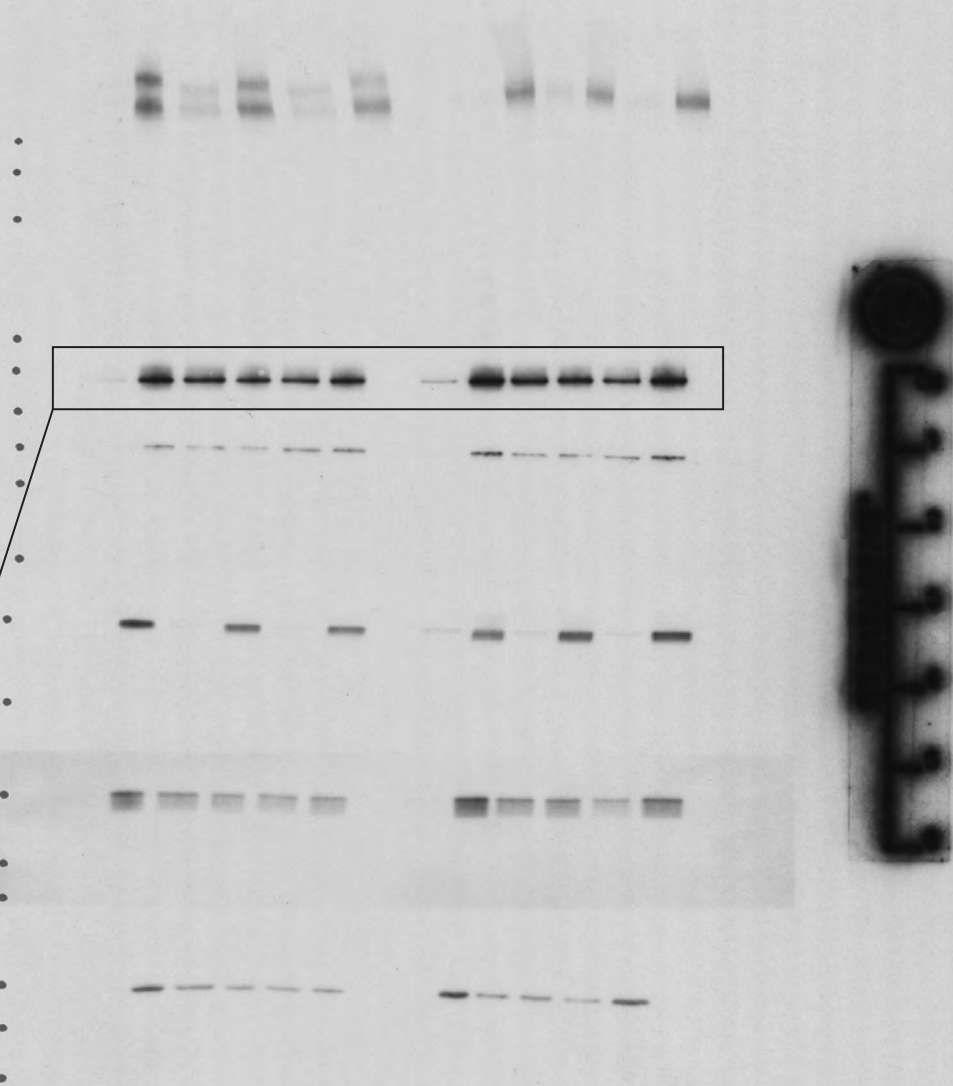

Cropped area for Figure 2-figure supplement 3B  
Mcm6

22/04/22  
2min

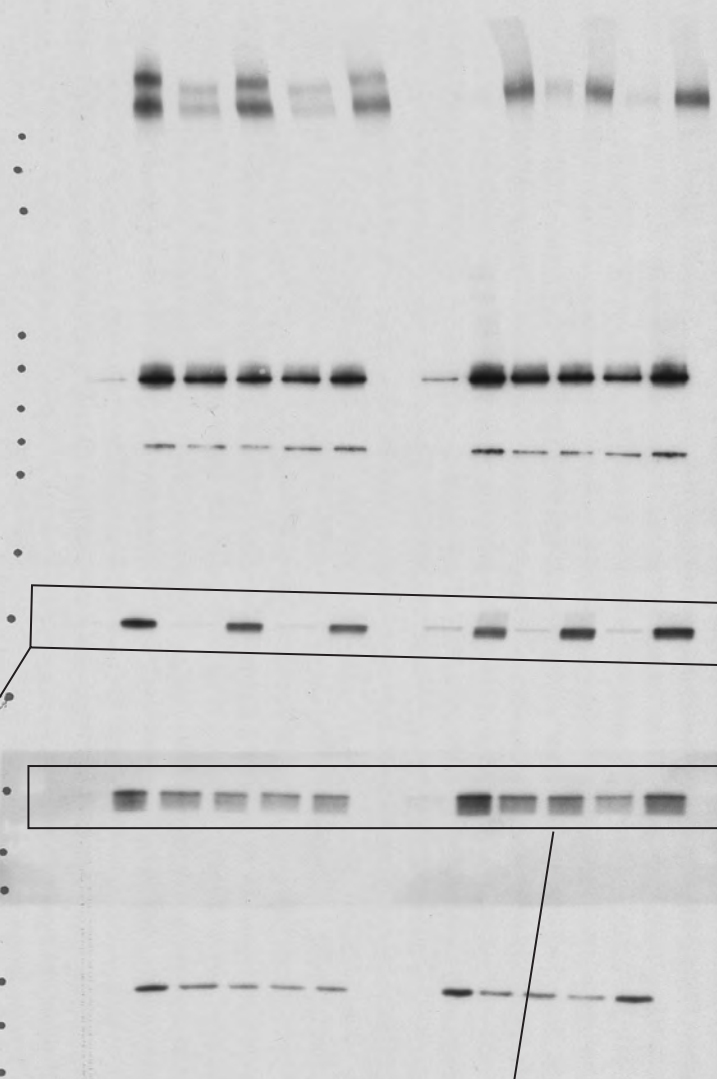

Cropped area for Figure 2-figure supplement 3B  
Cdc45

Cropped area for Figure 2-figure supplement 3B  
Sld5
