# Supplementary material for: Multiple UBX proteins reduce the ubiquitin threshold of the mammalian p97-UFD1-NPL4 unfoldase
Source: eLife journal article supplement (doi:10.7554/elife.76763), 2022-08-03

Cropped area for Figure 1B

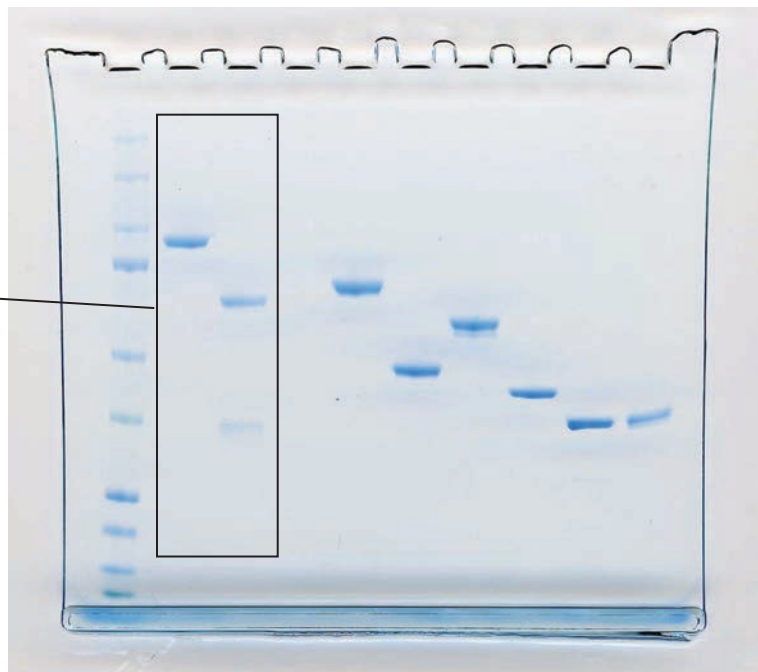



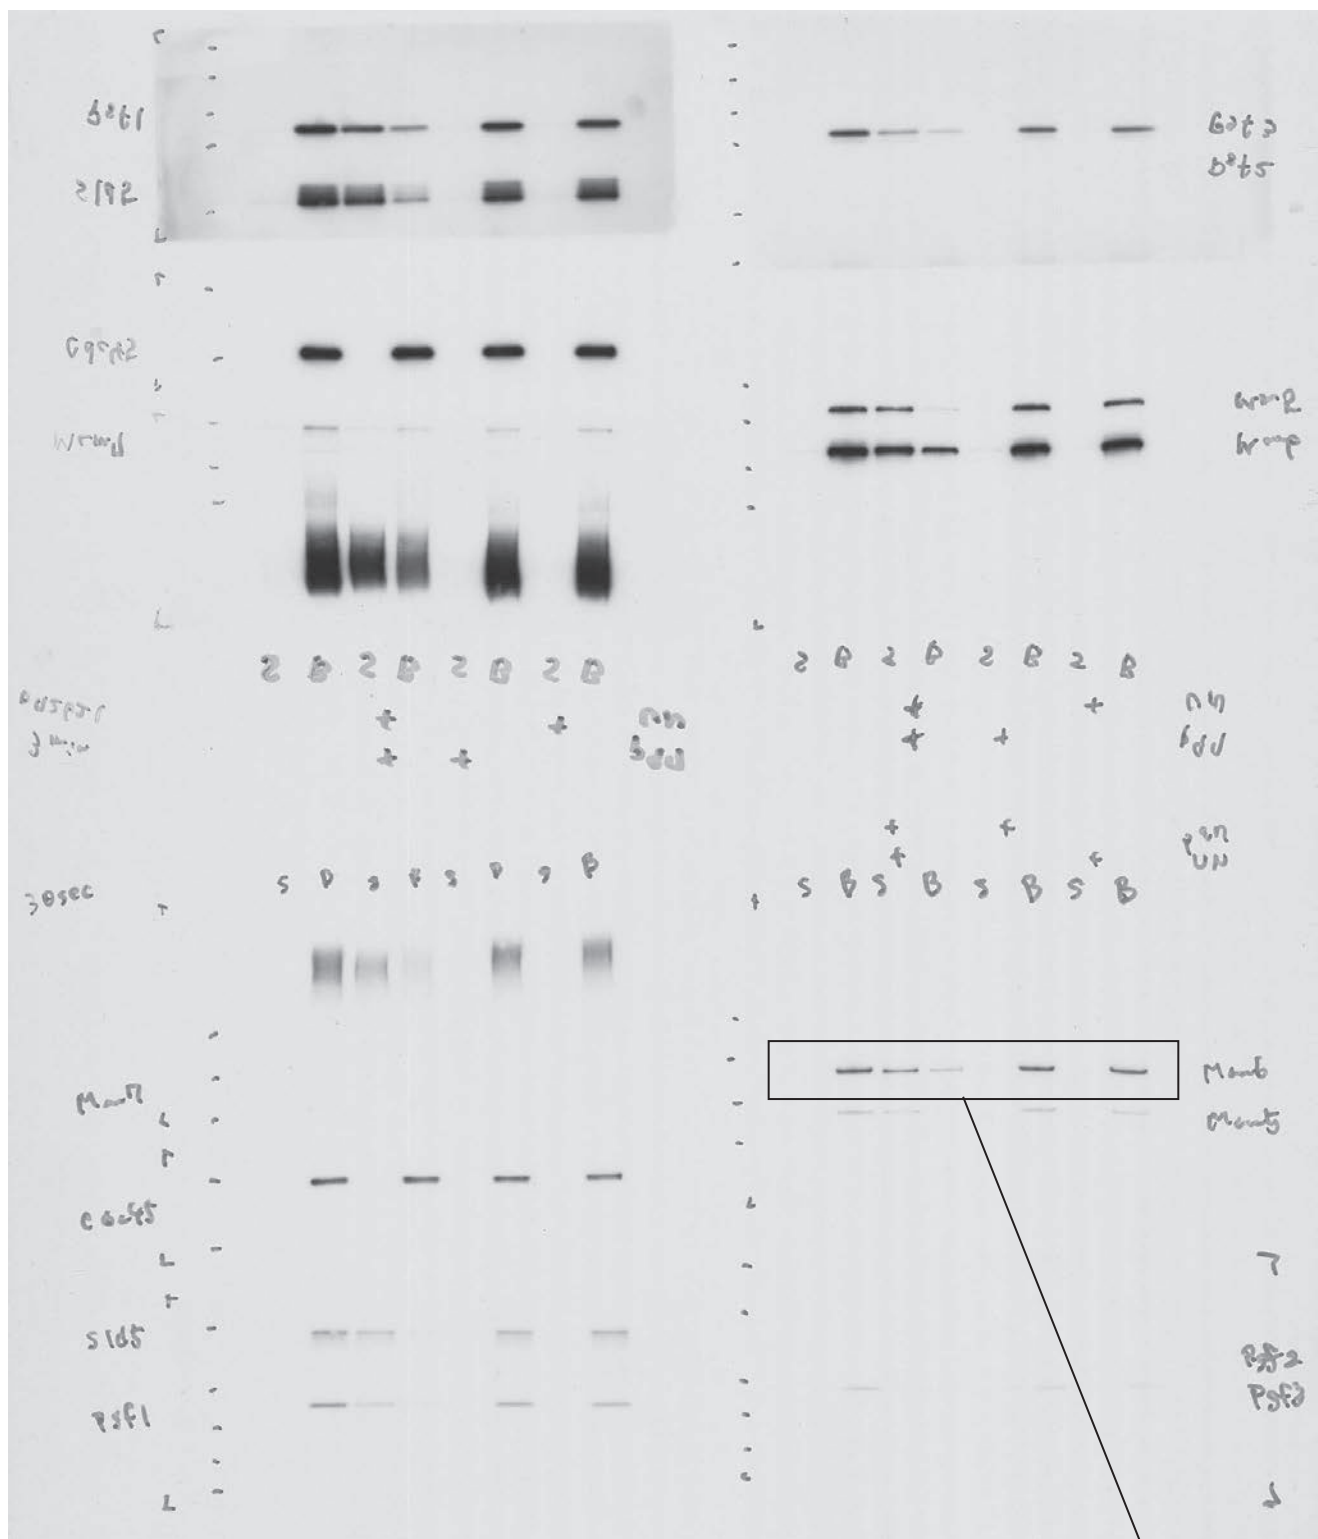

Cropped area for Figure 1C  
 Mcm6

Cropped area for Figure 1D

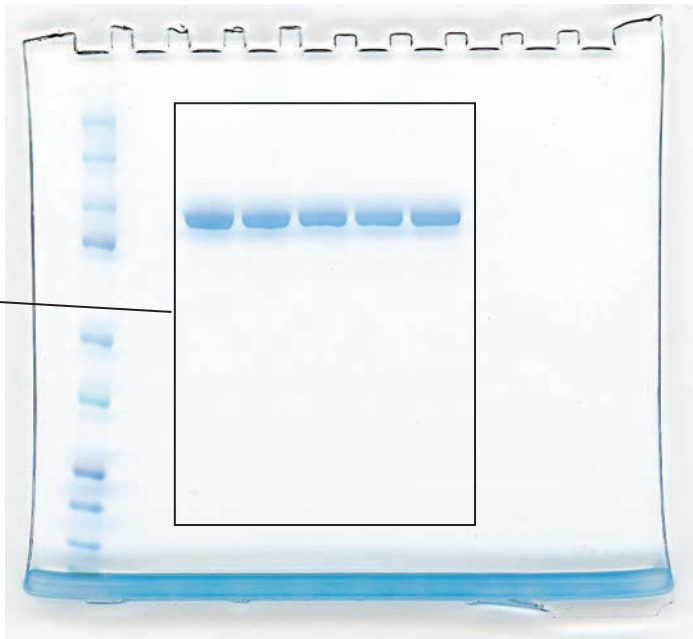

Cropped area for Figure 1E  
Sld5

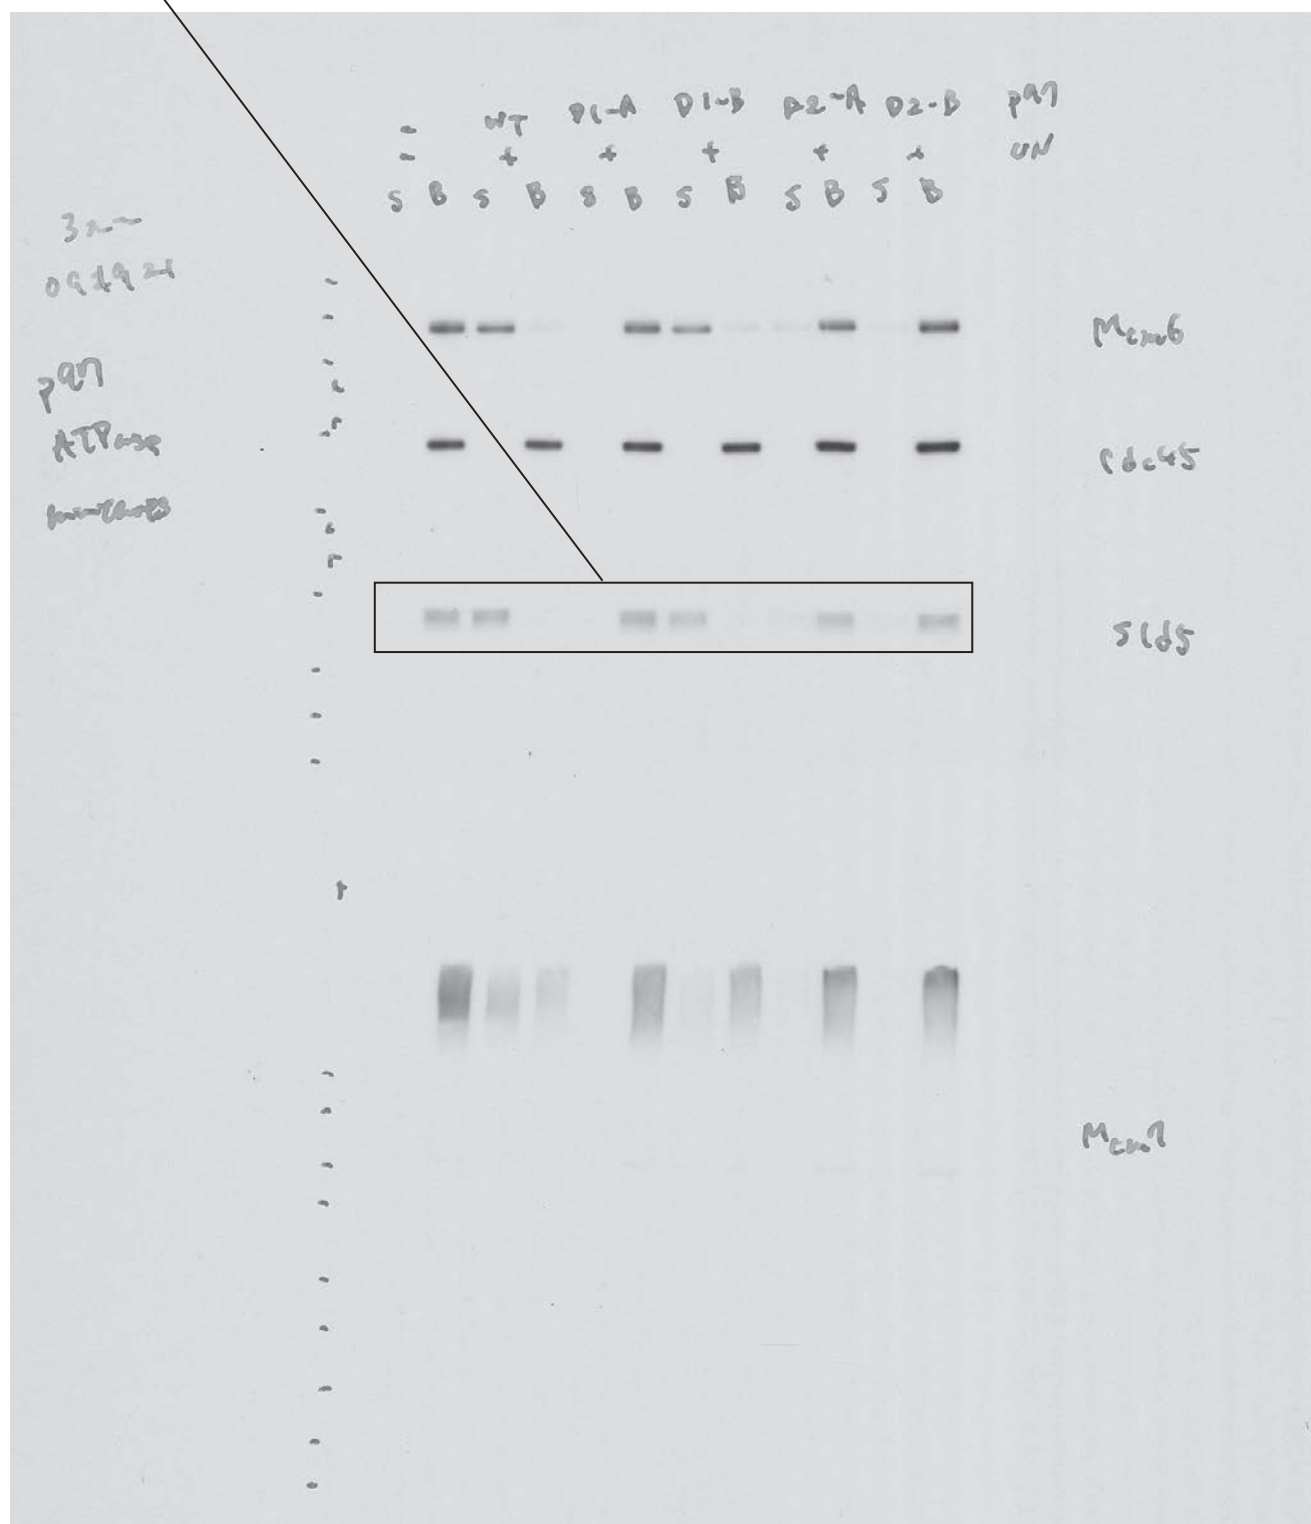

6222  
091921

|  | - | WT | D1-A | D1-B | D2-A | D2-B | 127 |
|--|---|----|------|------|------|------|-----|
|  | - | +  | +    | +    | +    | +    | UN  |
|  | S | B  | S    | B    | S    | B    | S   |

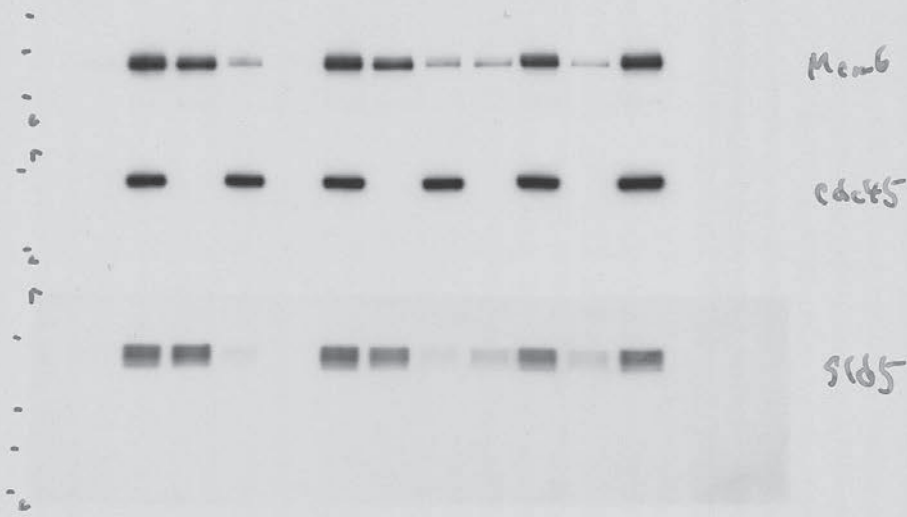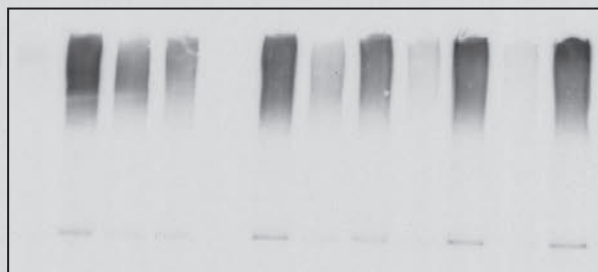

Mcm7

Cropped area for Figure 1E  
Mcm7

Cropped area for Figure 1E  
Cdc45

Cropped area for Figure 1E  
Mcm6

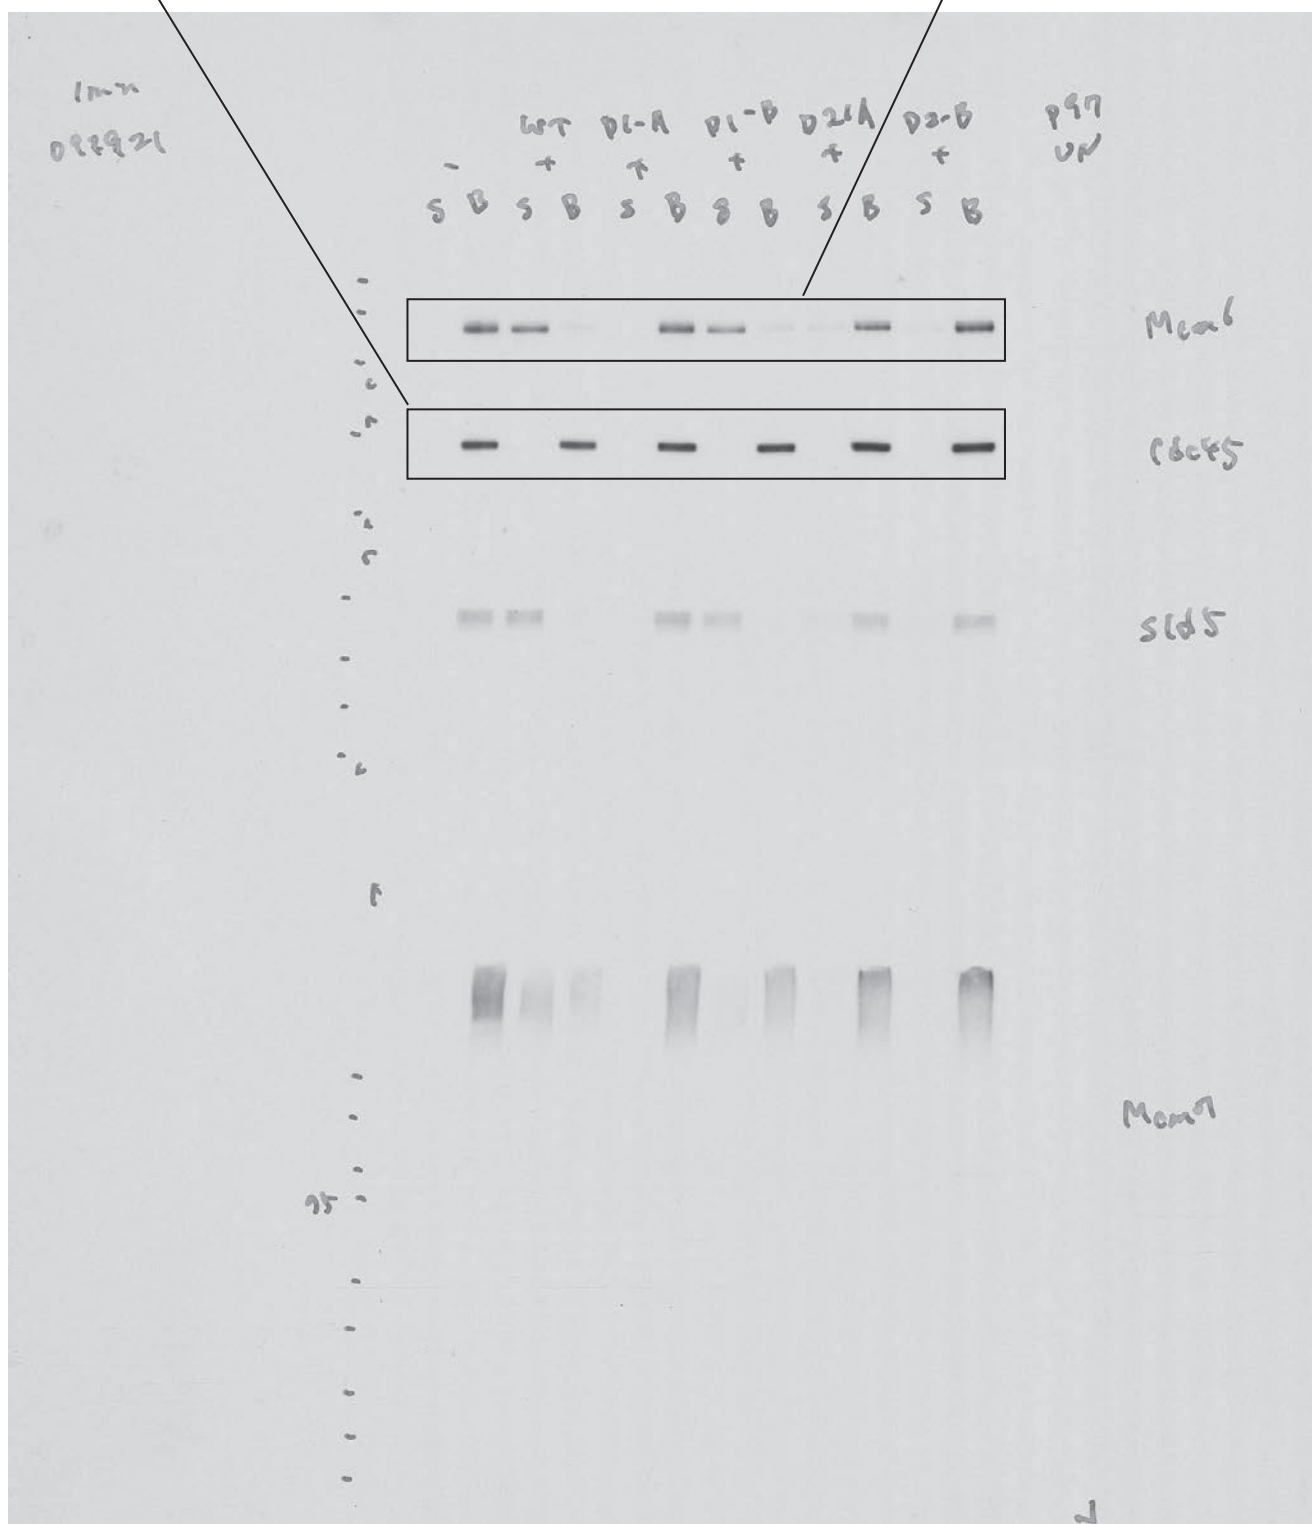

Supplement: supp [file elife-76763-supp-v1.zip]
