# Supplementary material for: Multiple UBX proteins reduce the ubiquitin threshold of the mammalian p97-UFD1-NPL4 unfoldase
Source: eLife journal article supplement (doi:10.7554/elife.76763), 2022-08-03
Supplement: supp [file elife-76763-supp-v1.zip]

Cropped area for Figure 6-figure supplement 3D  
FAF1

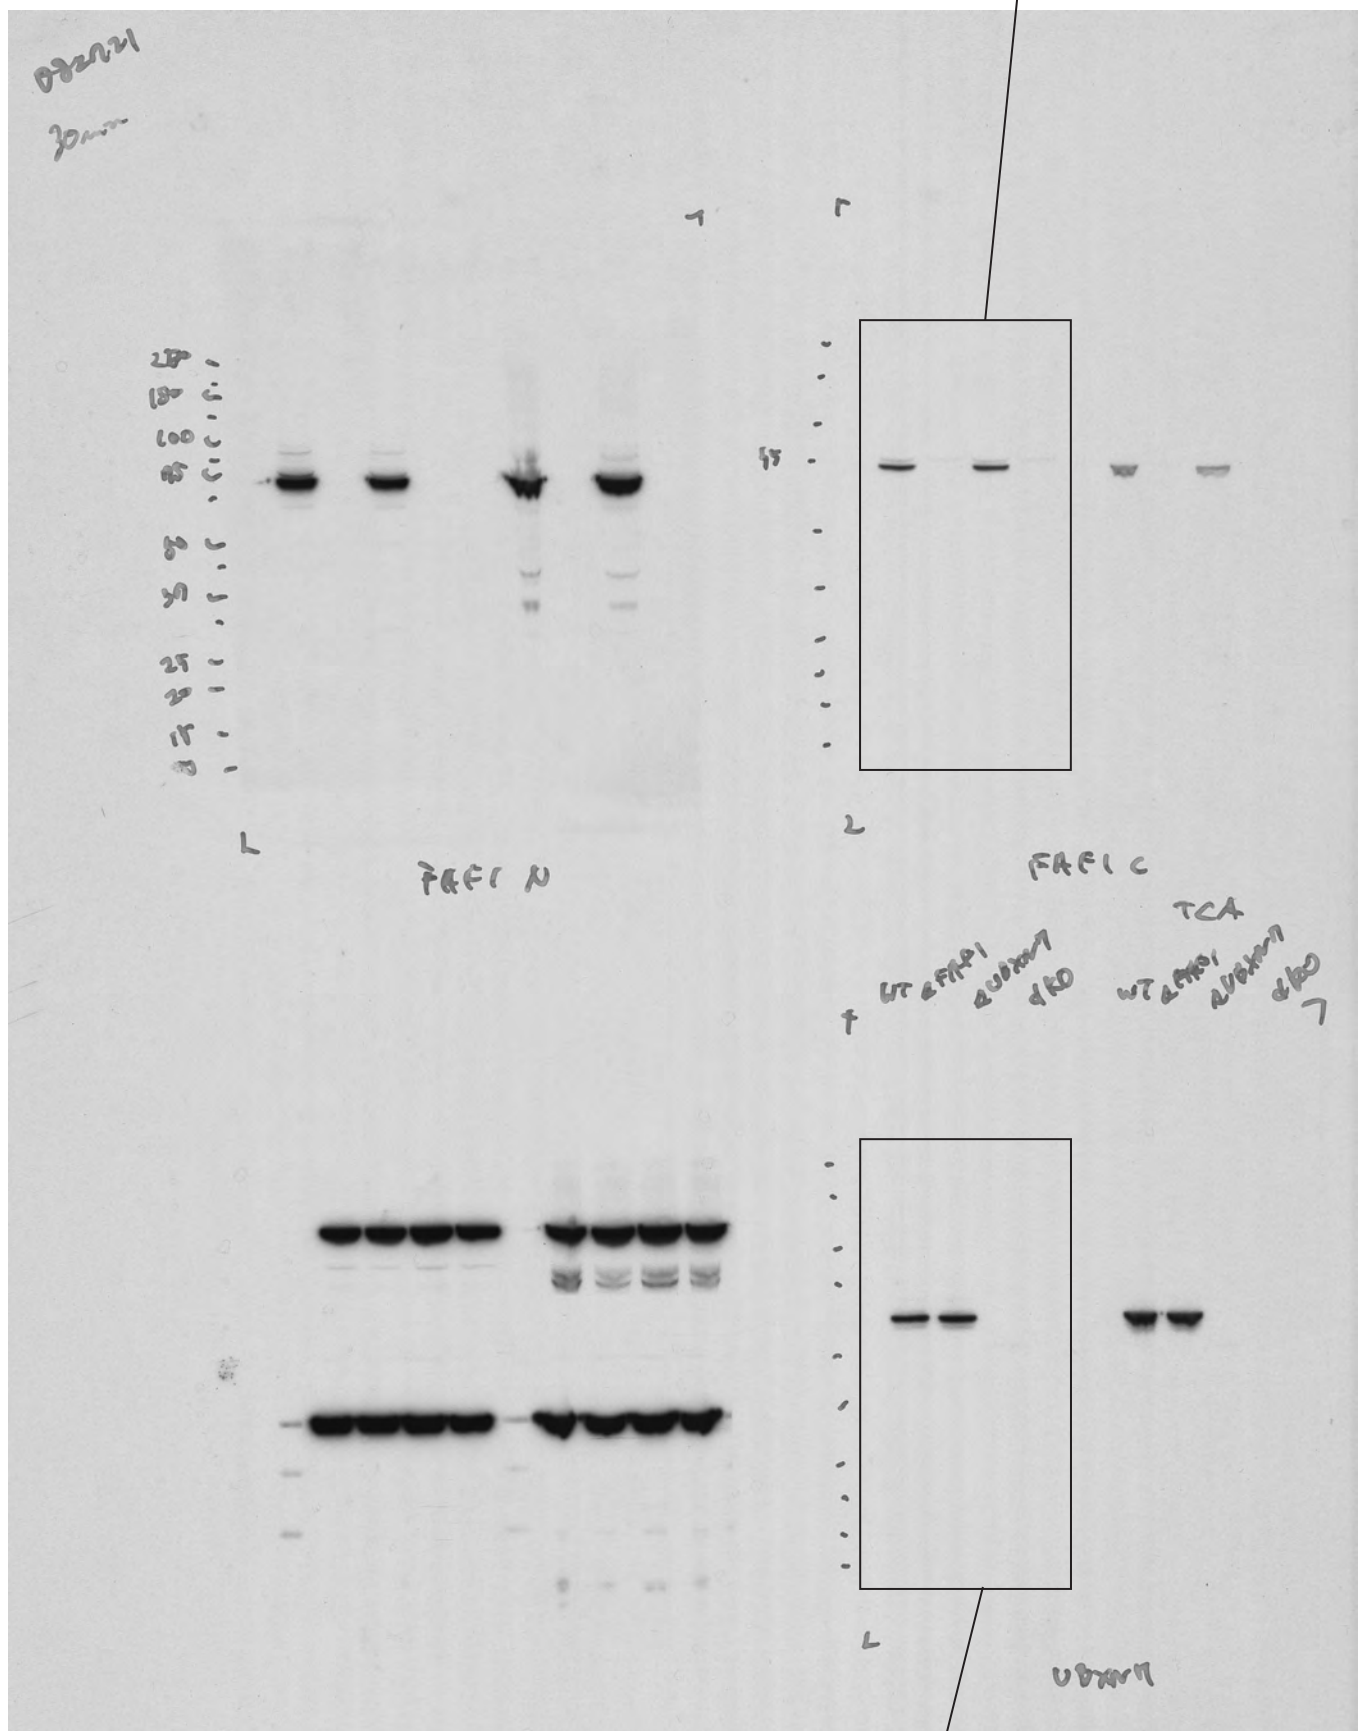

Cropped area for Figure 6-figure supplement 3D  
UBXN7

Cropped area for Figure 6-figure supplement 3D  
Ponceau S

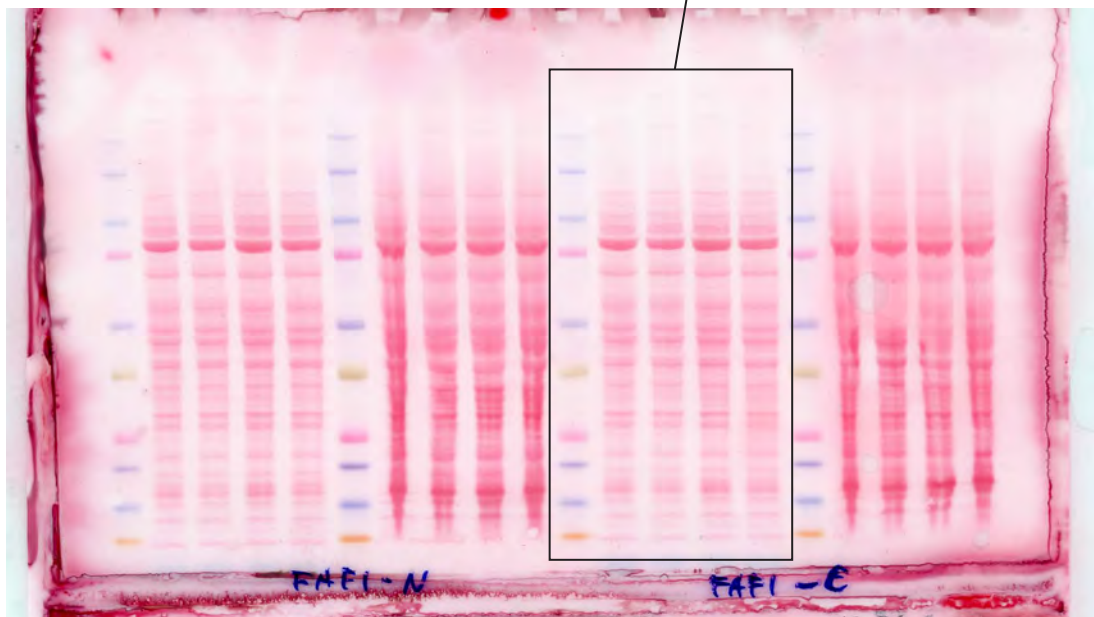

Cropped area for Figure 6-figure supplement 3E  
FAF1

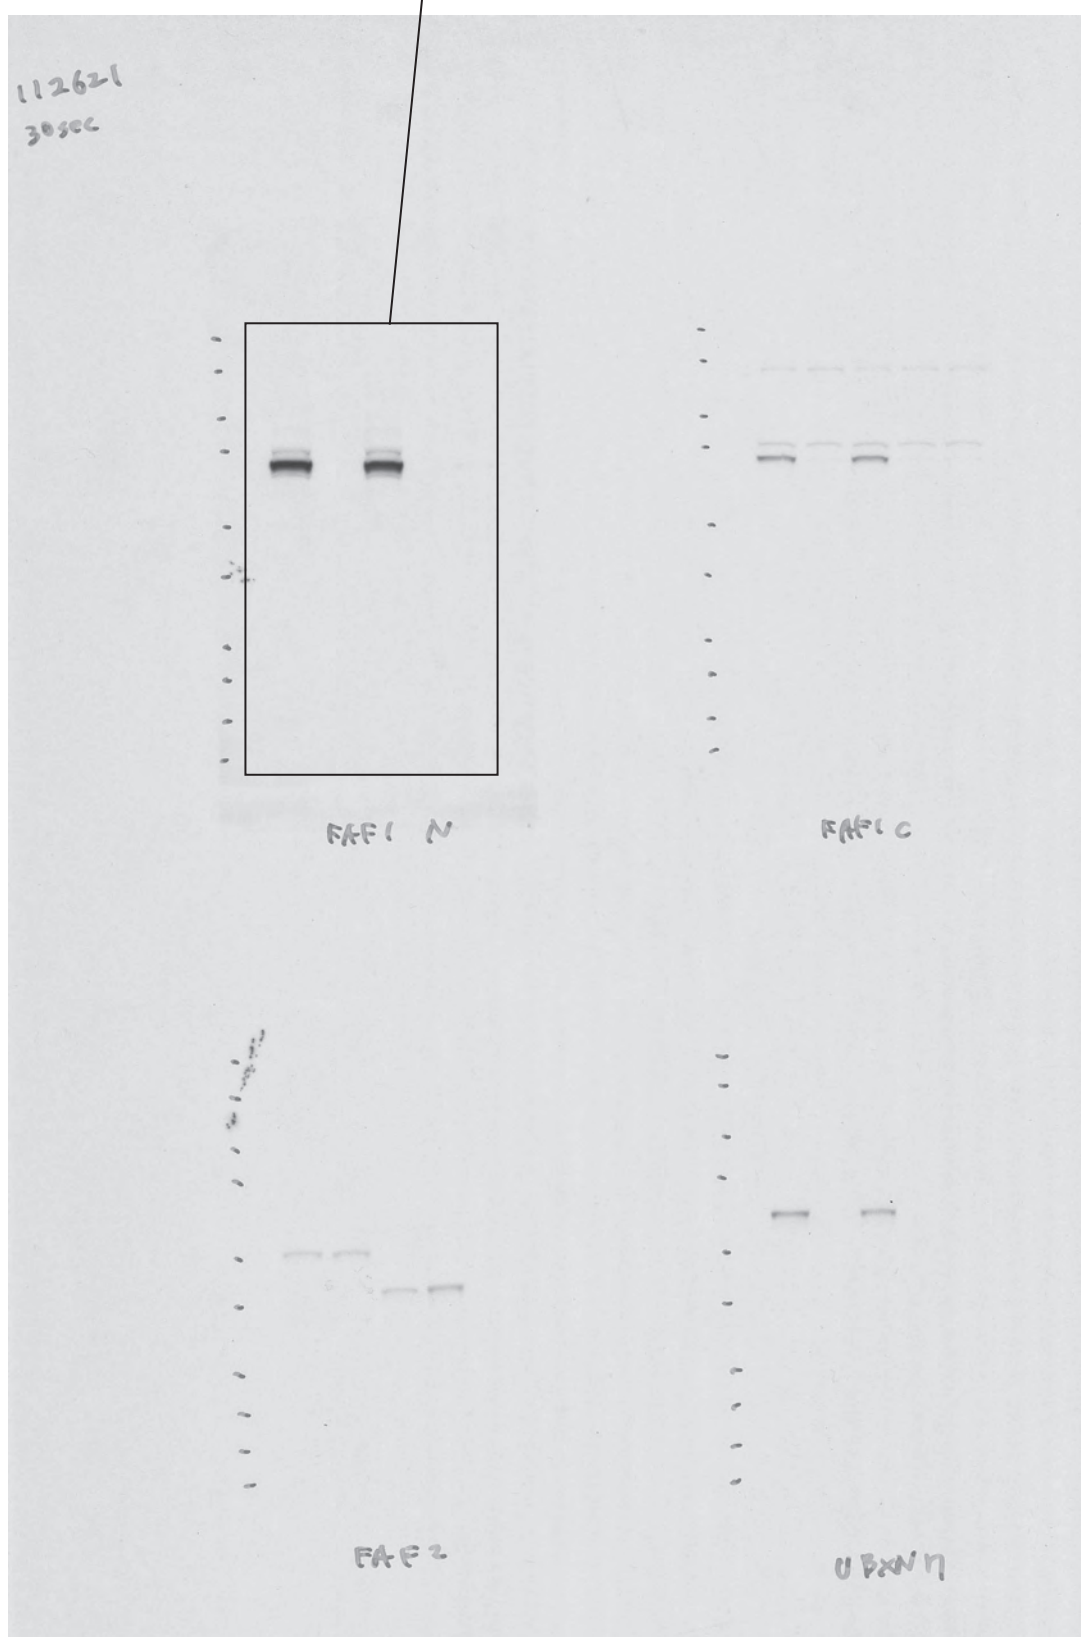

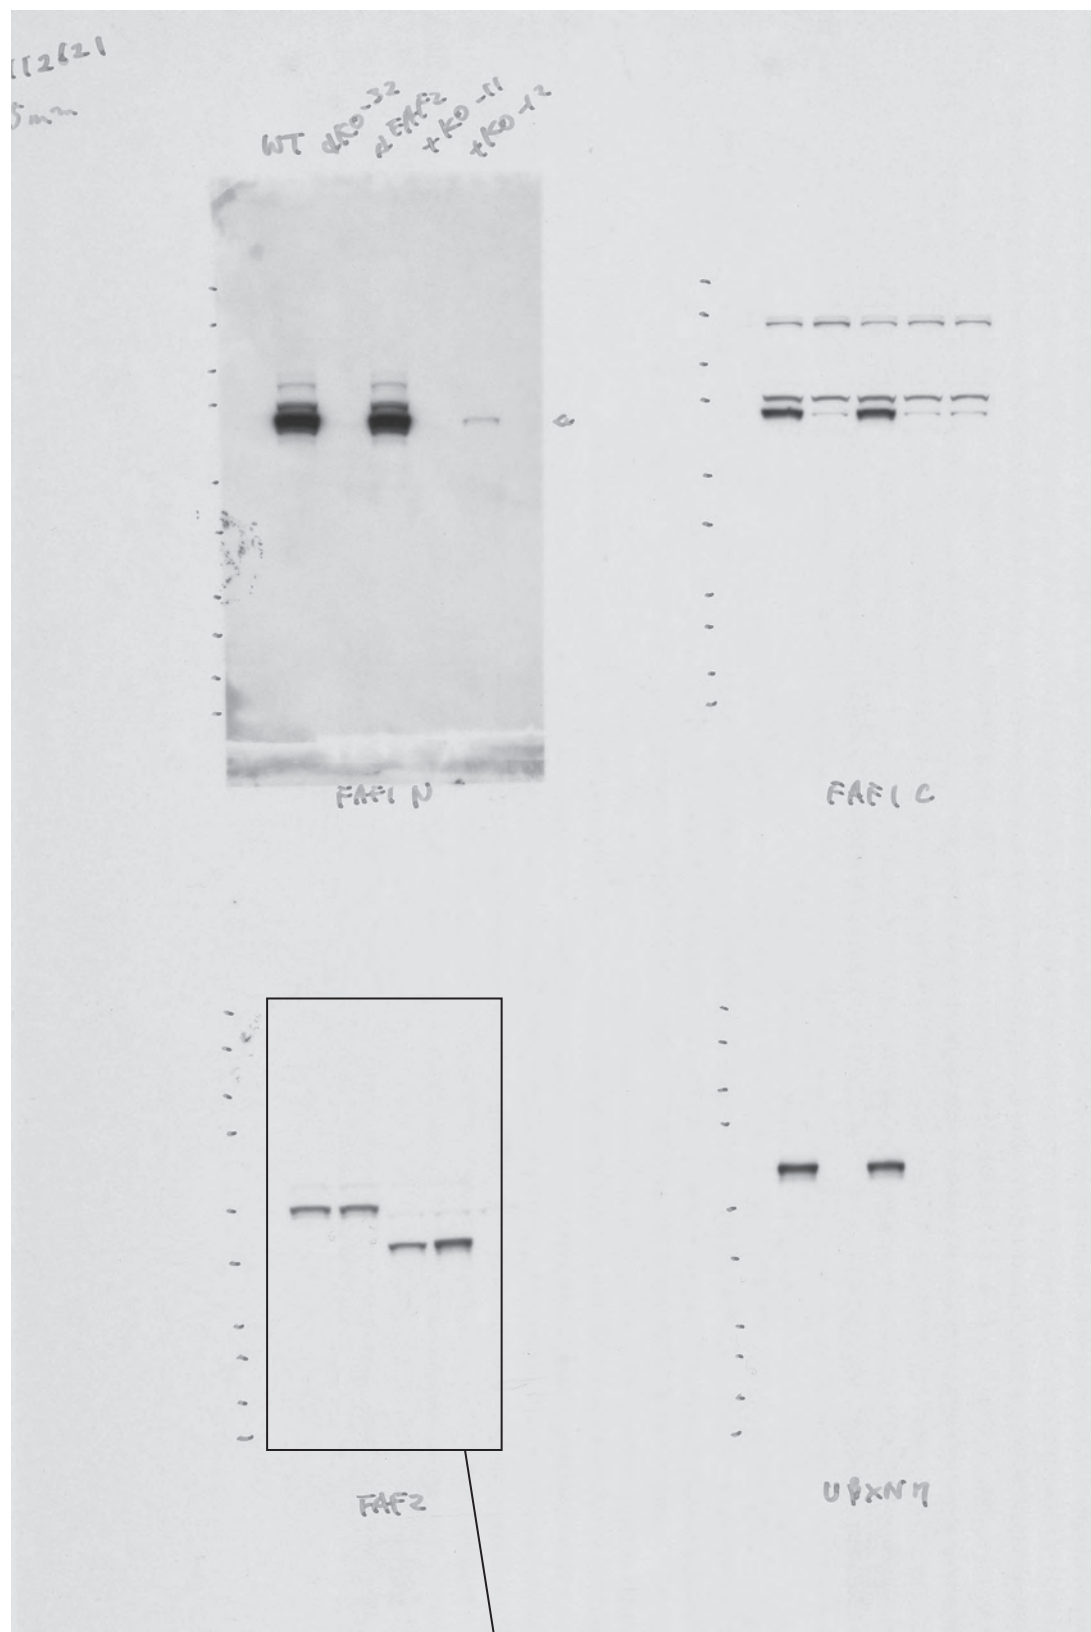

Cropped area for Figure 6-figure supplement 3E  
FAF2

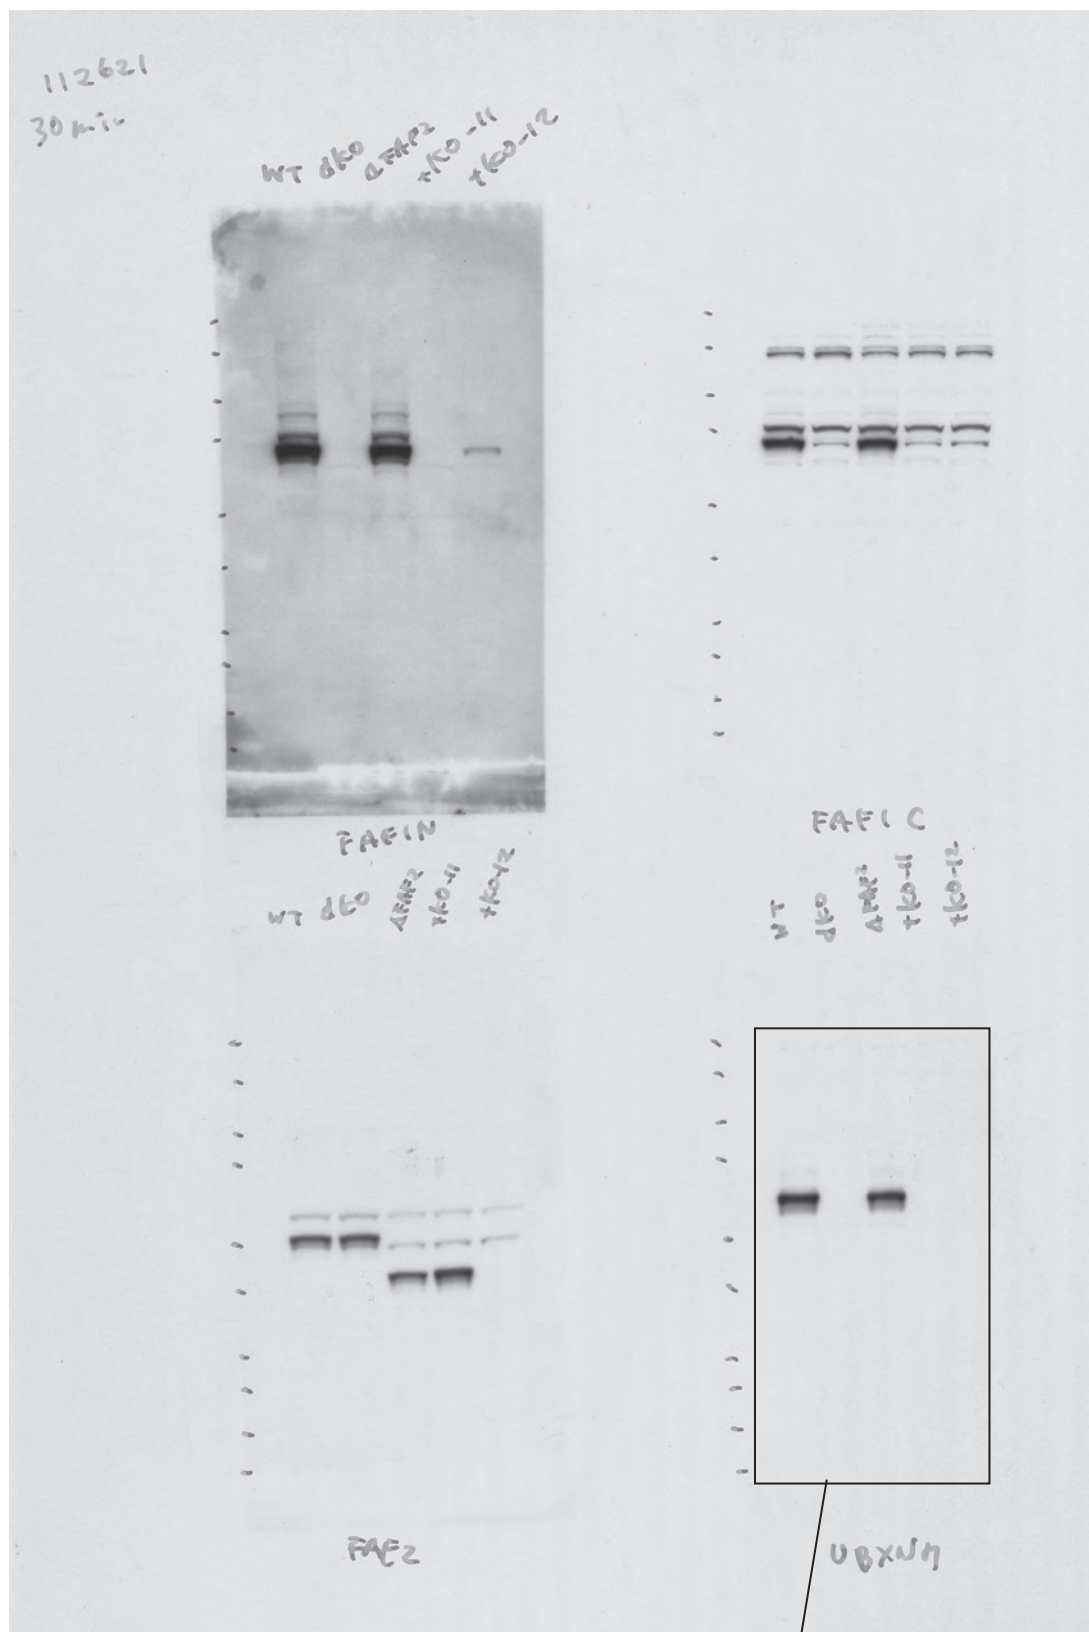

Cropped area for Figure 6-figure supplement 3E  
UBXN7



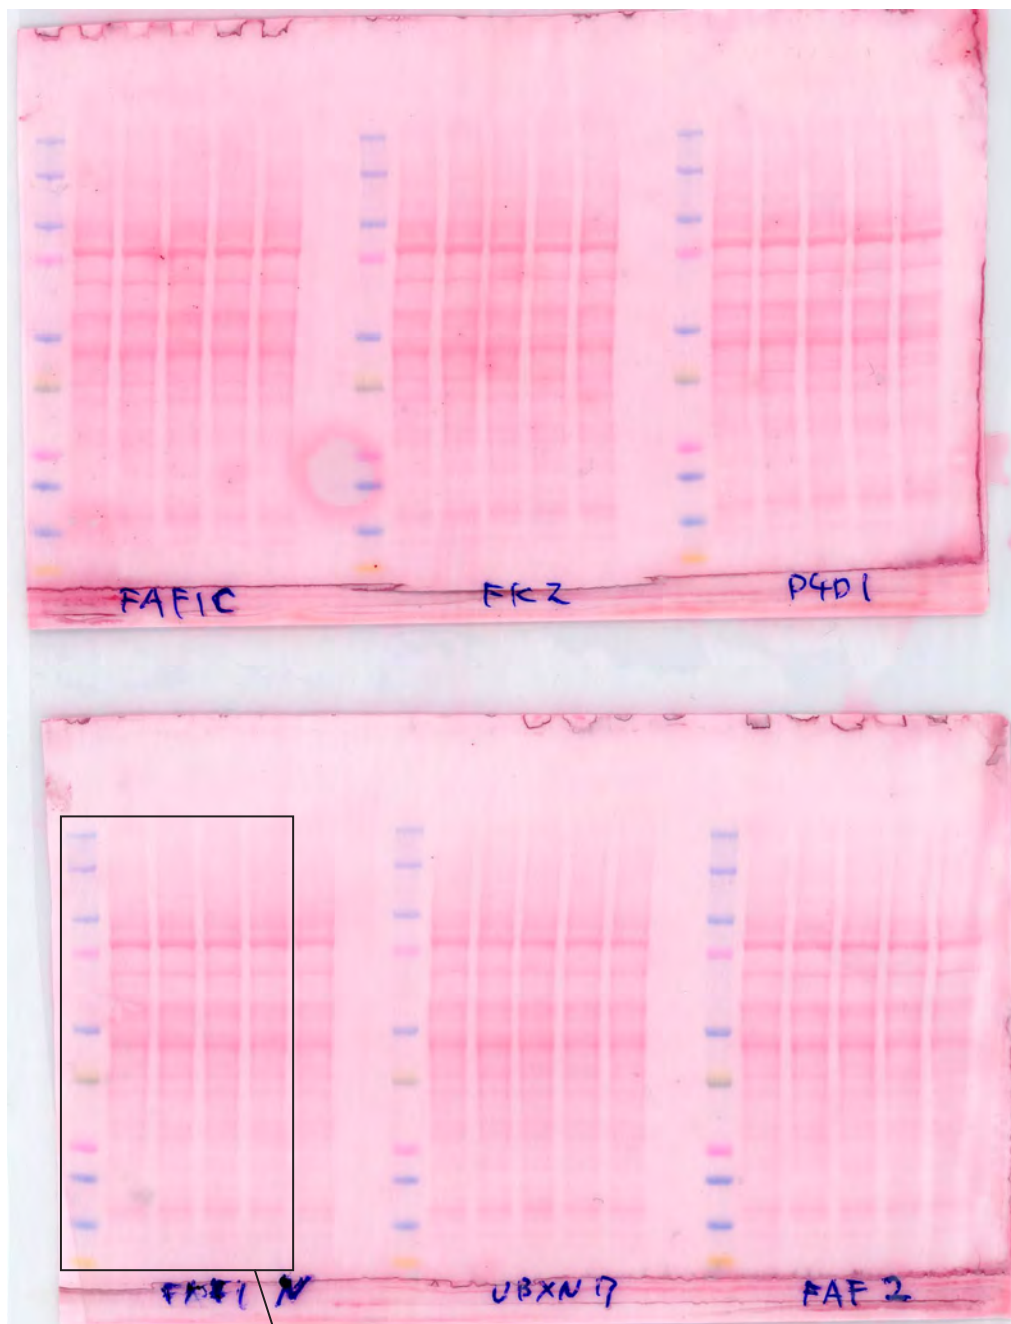

Cropped area for Figure 6-figure supplement 3E  
Ponceau S
