# Supplementary material for: Multiple UBX proteins reduce the ubiquitin threshold of the mammalian p97-UFD1-NPL4 unfoldase
Source: eLife journal article supplement (doi:10.7554/elife.76763), 2022-08-03

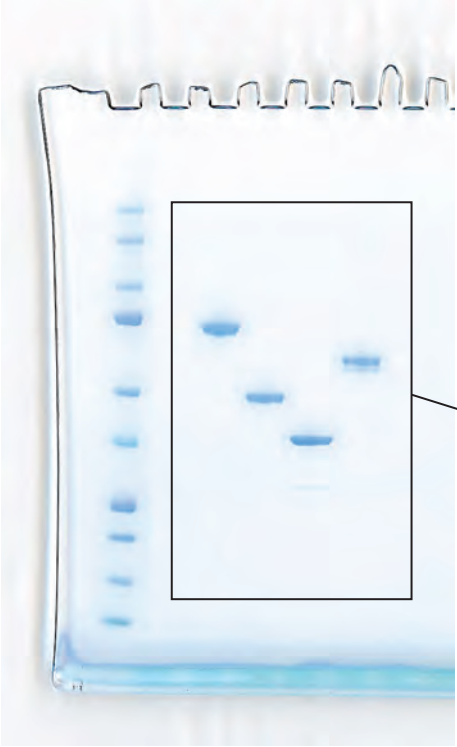

Cropped area for Figure 4B

Cropped areas for Figure 4C  
Cdc45

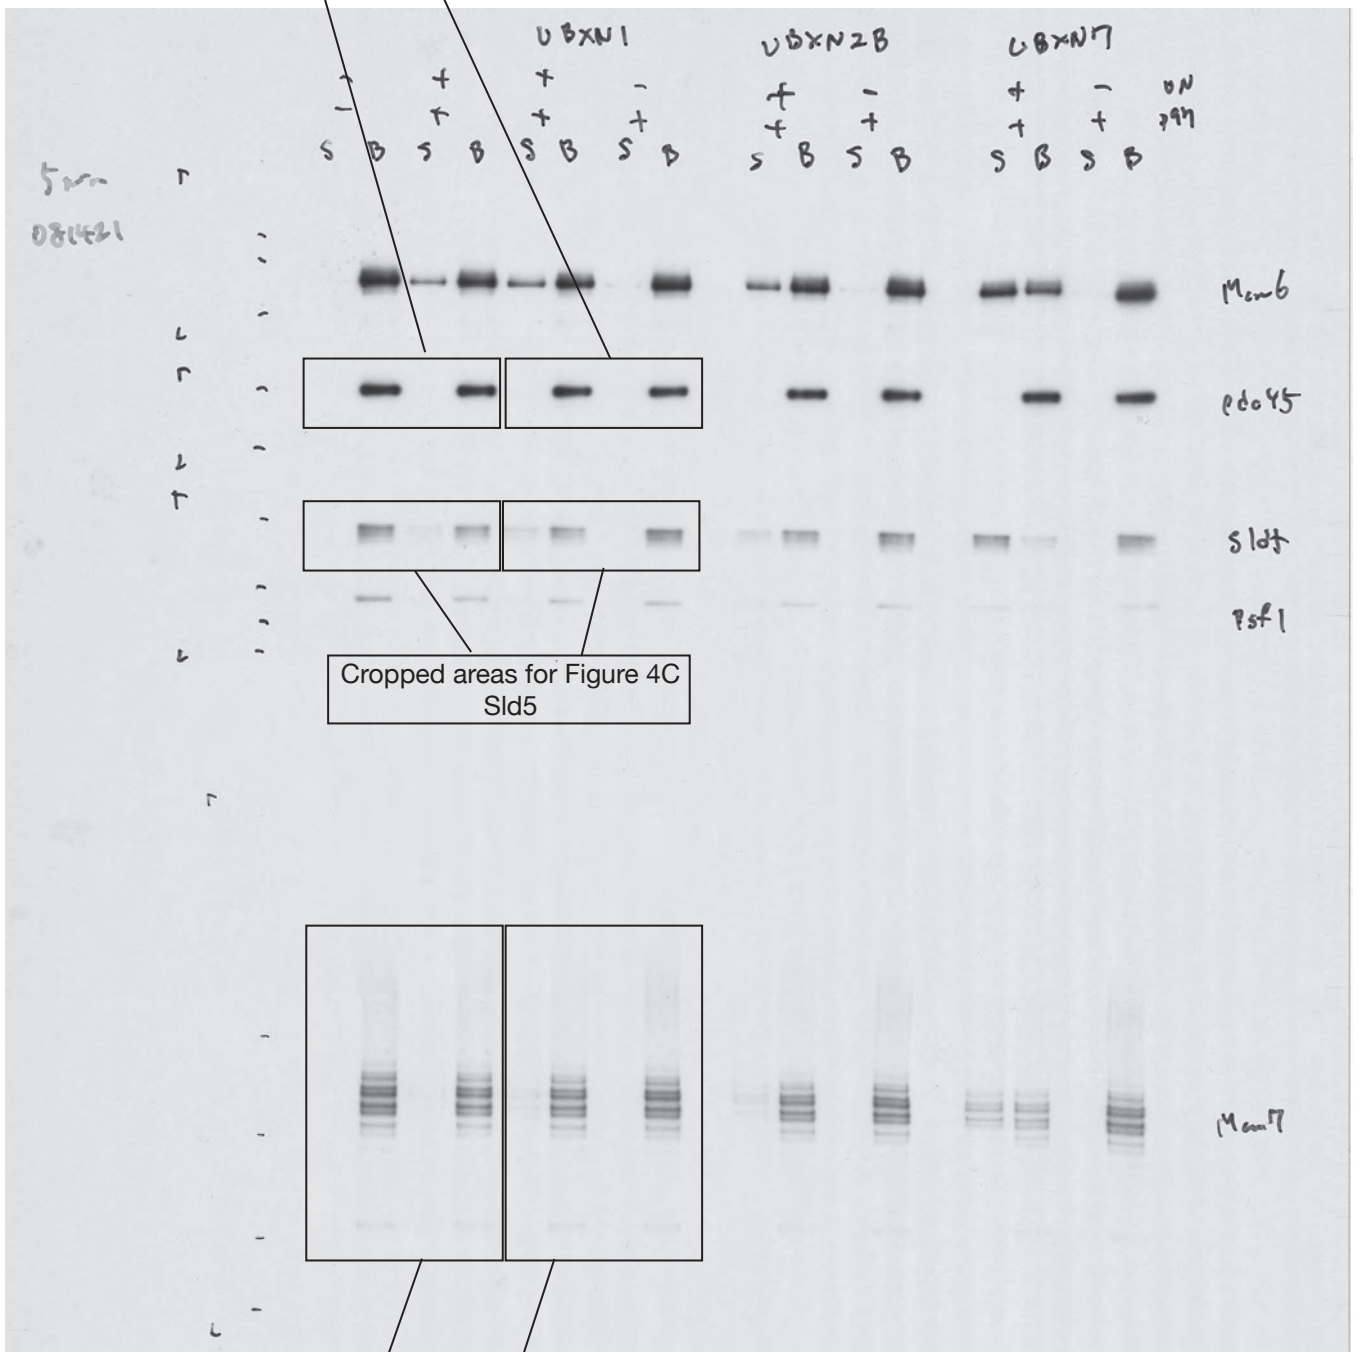

Cropped areas for Figure 4C  
Mcm6

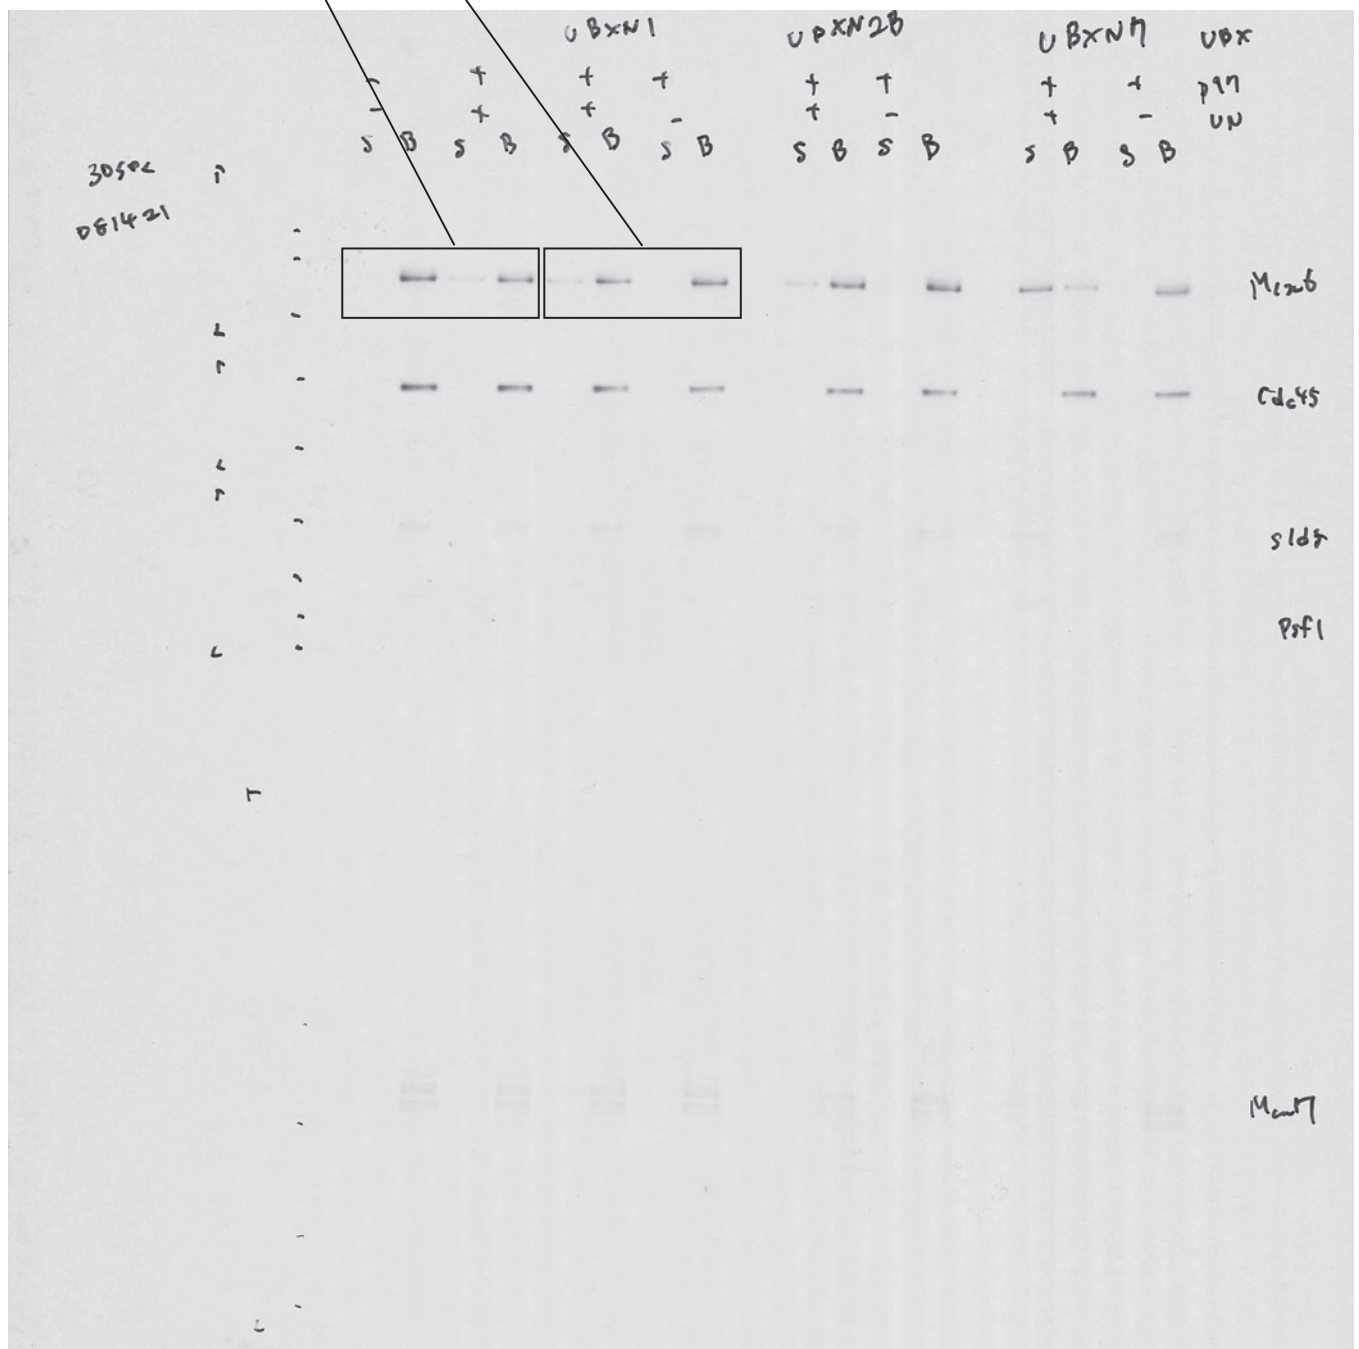

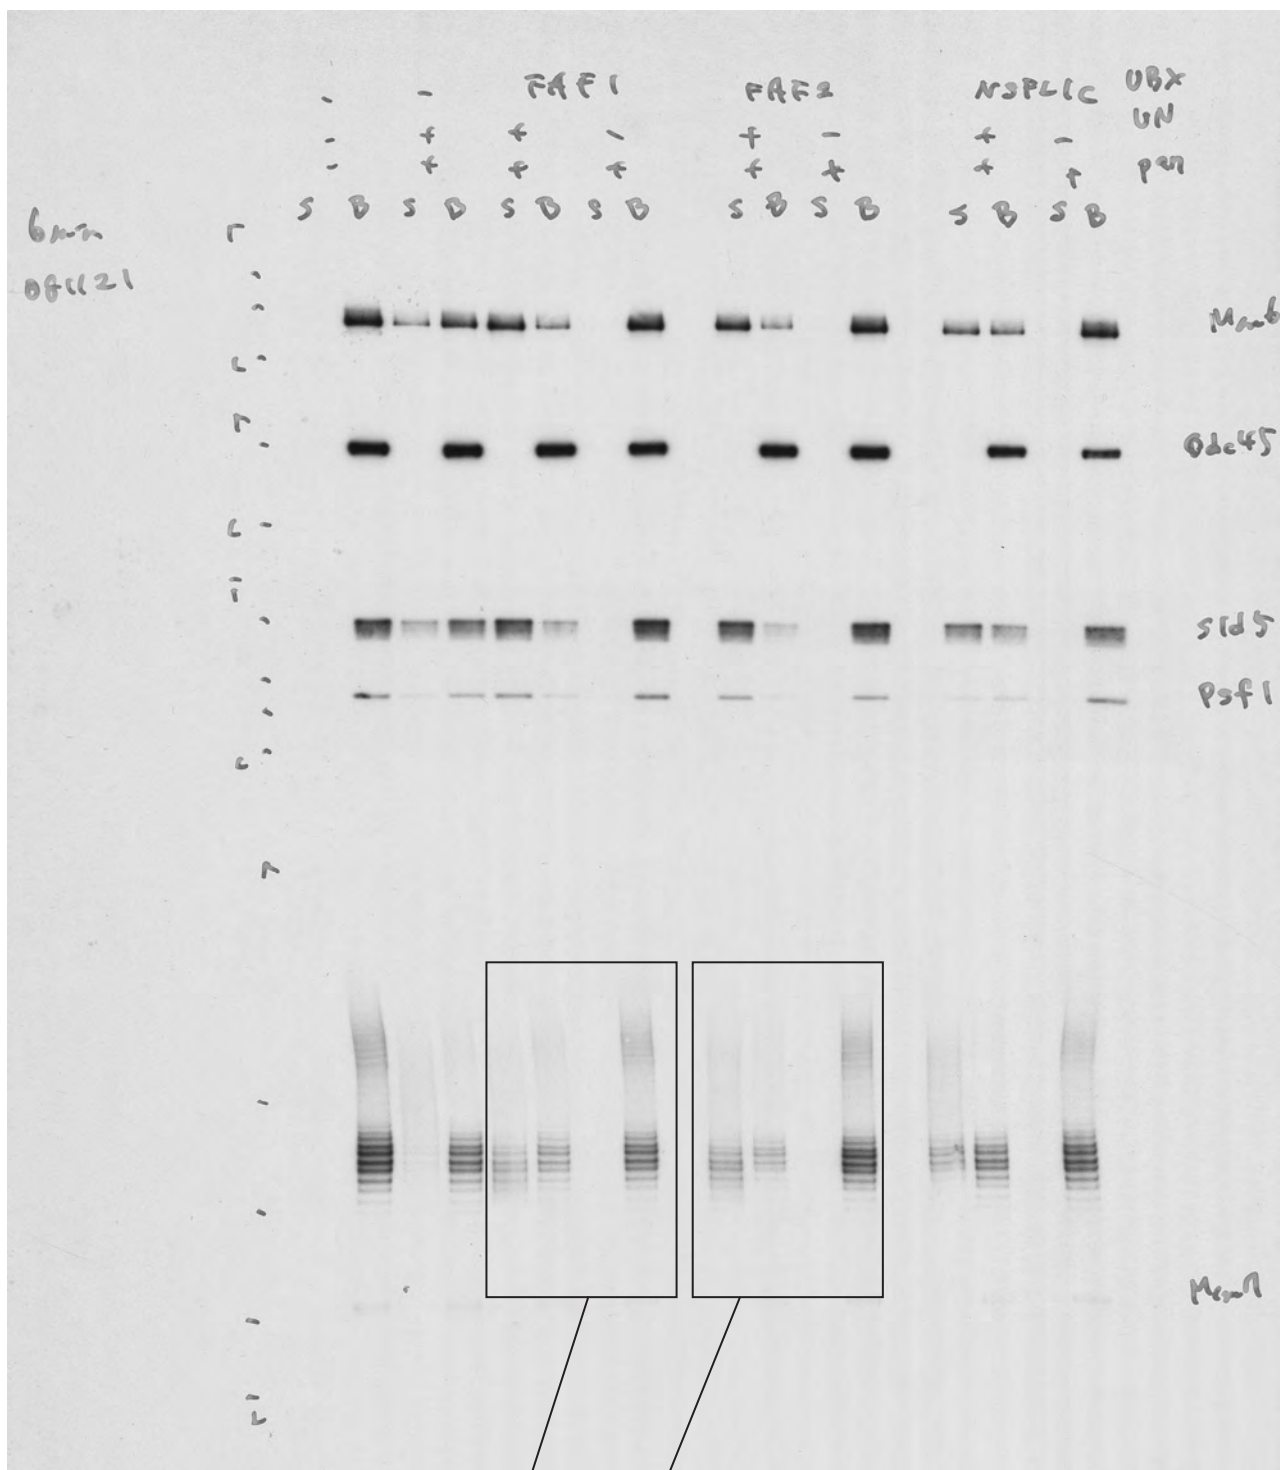

Cropped areas for Figure4D  
Mcm6 (FAF1 & FAF2 samples)

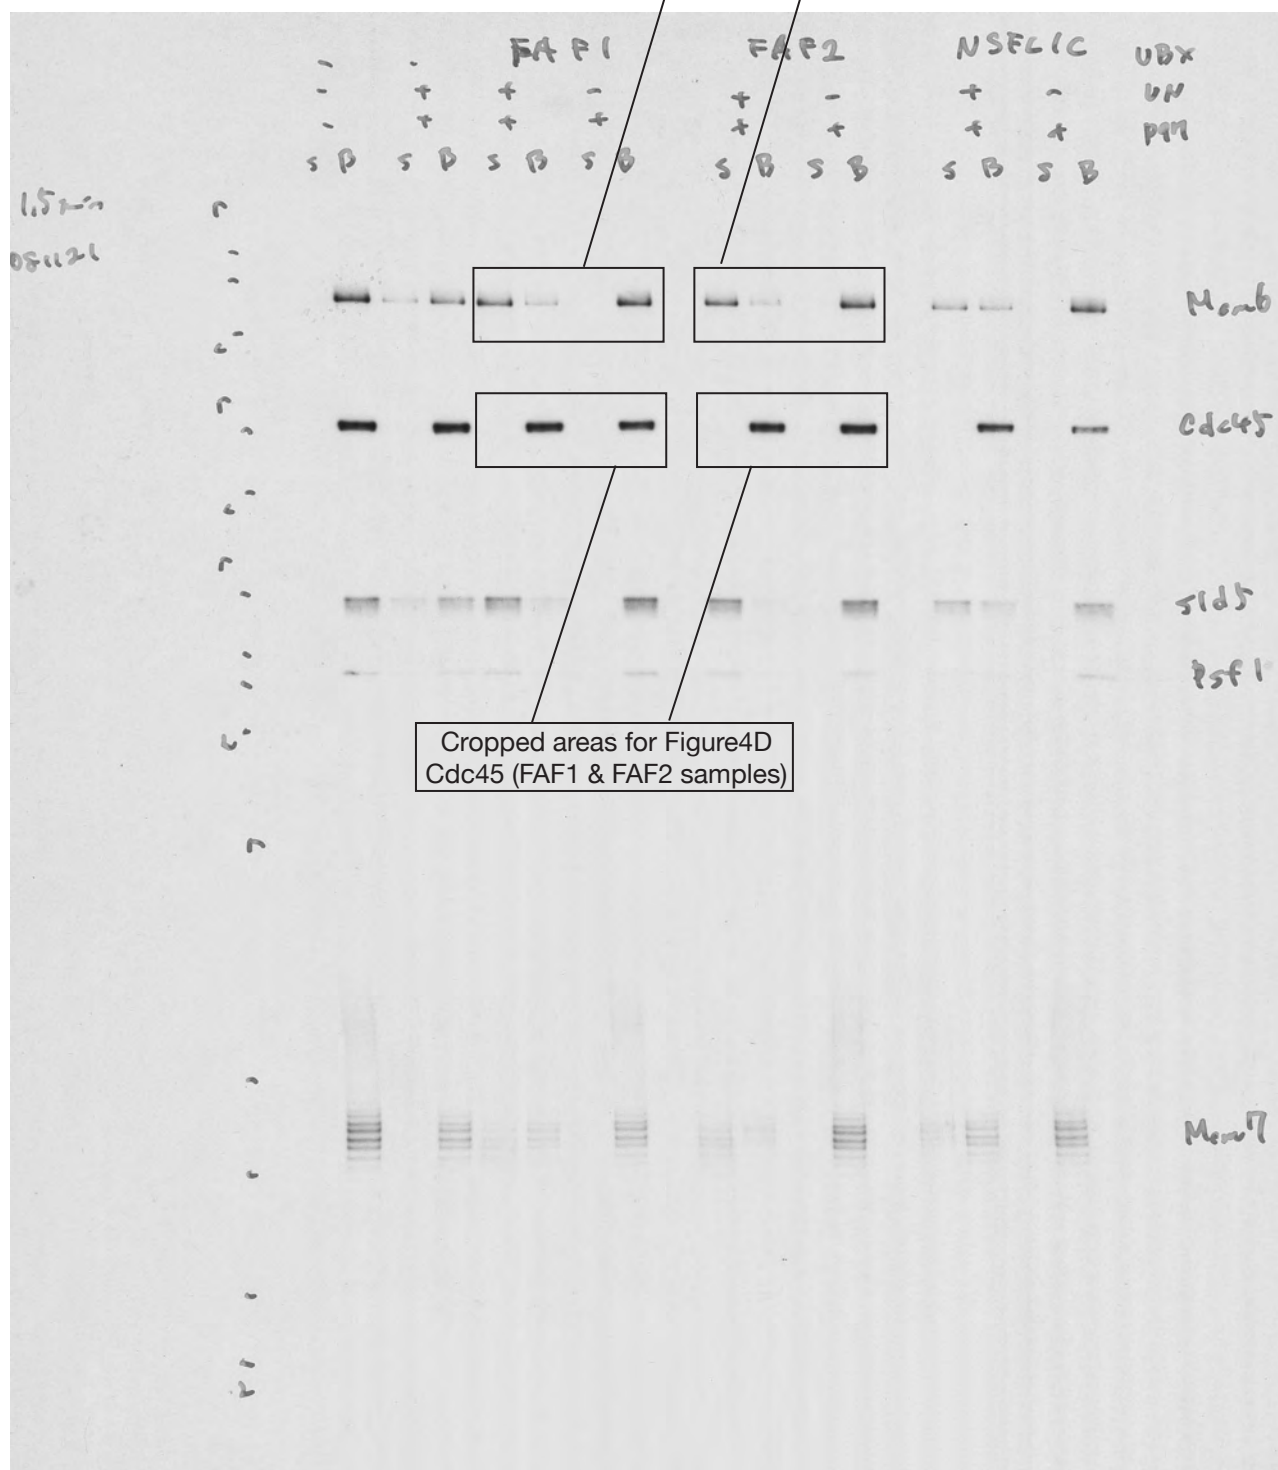

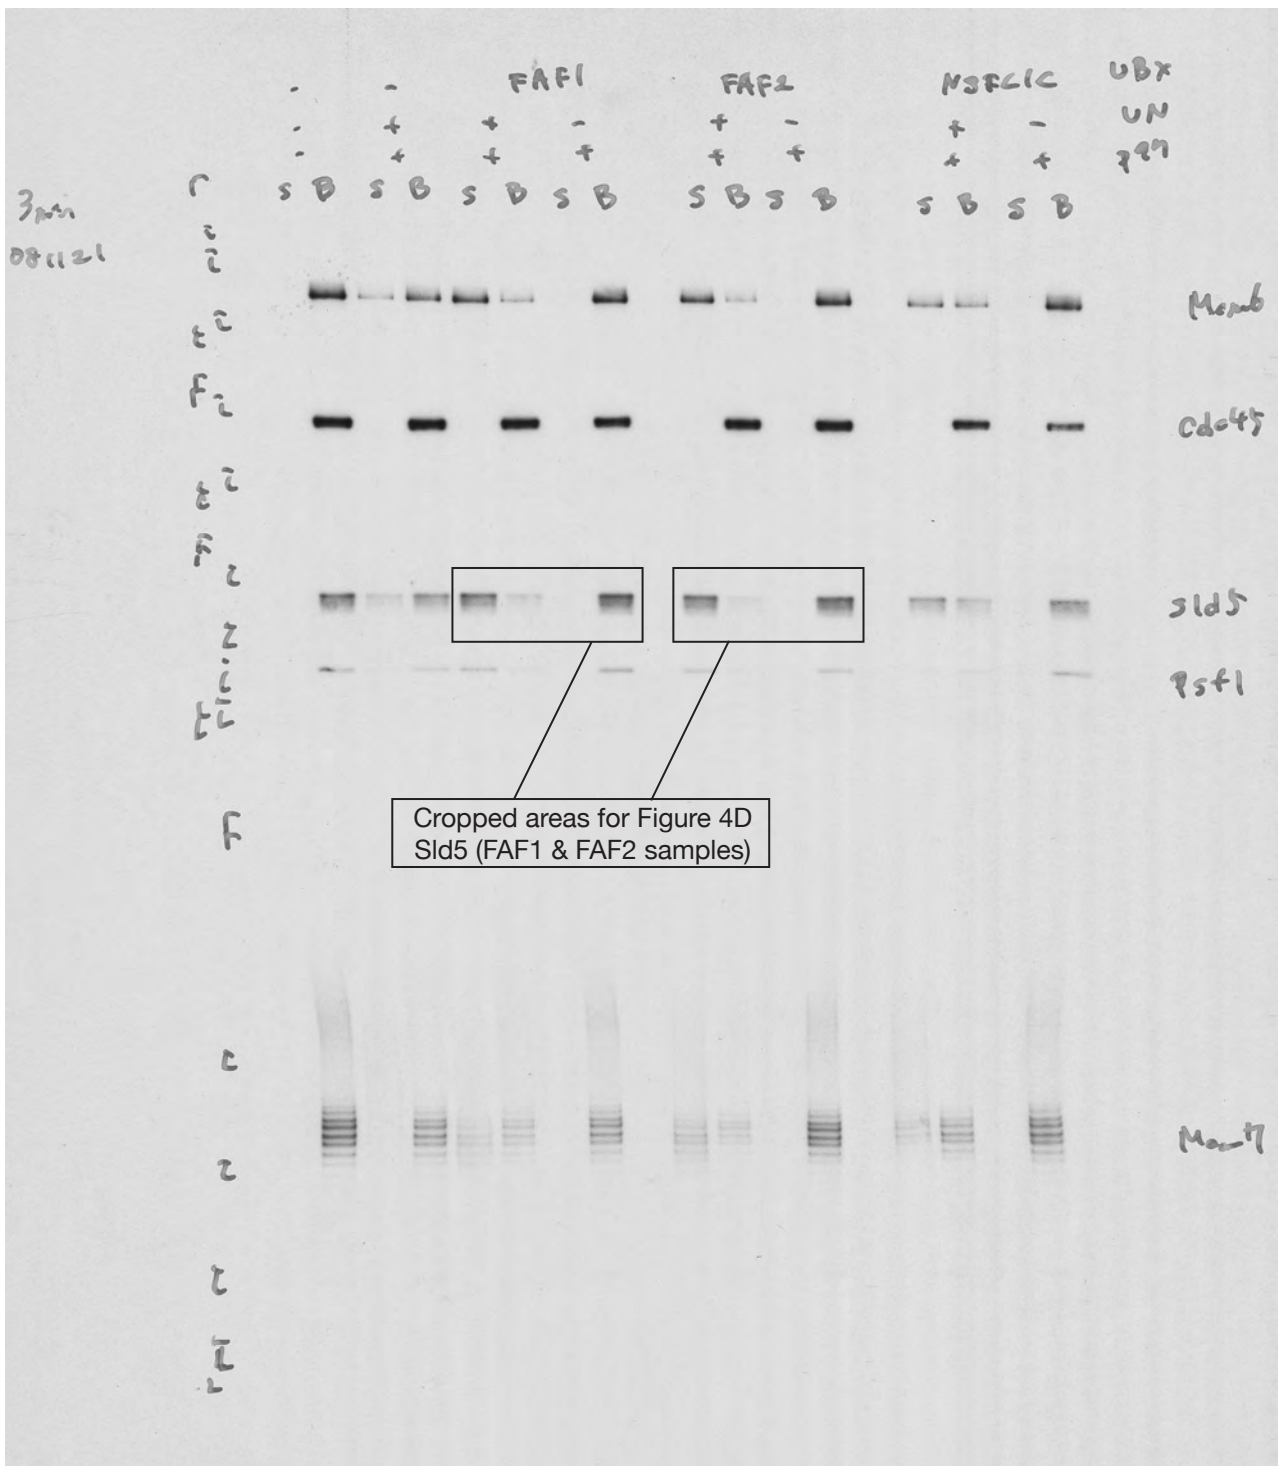

Cropped area for Figure 4D  
Cdc45 (UBXN7 sample)

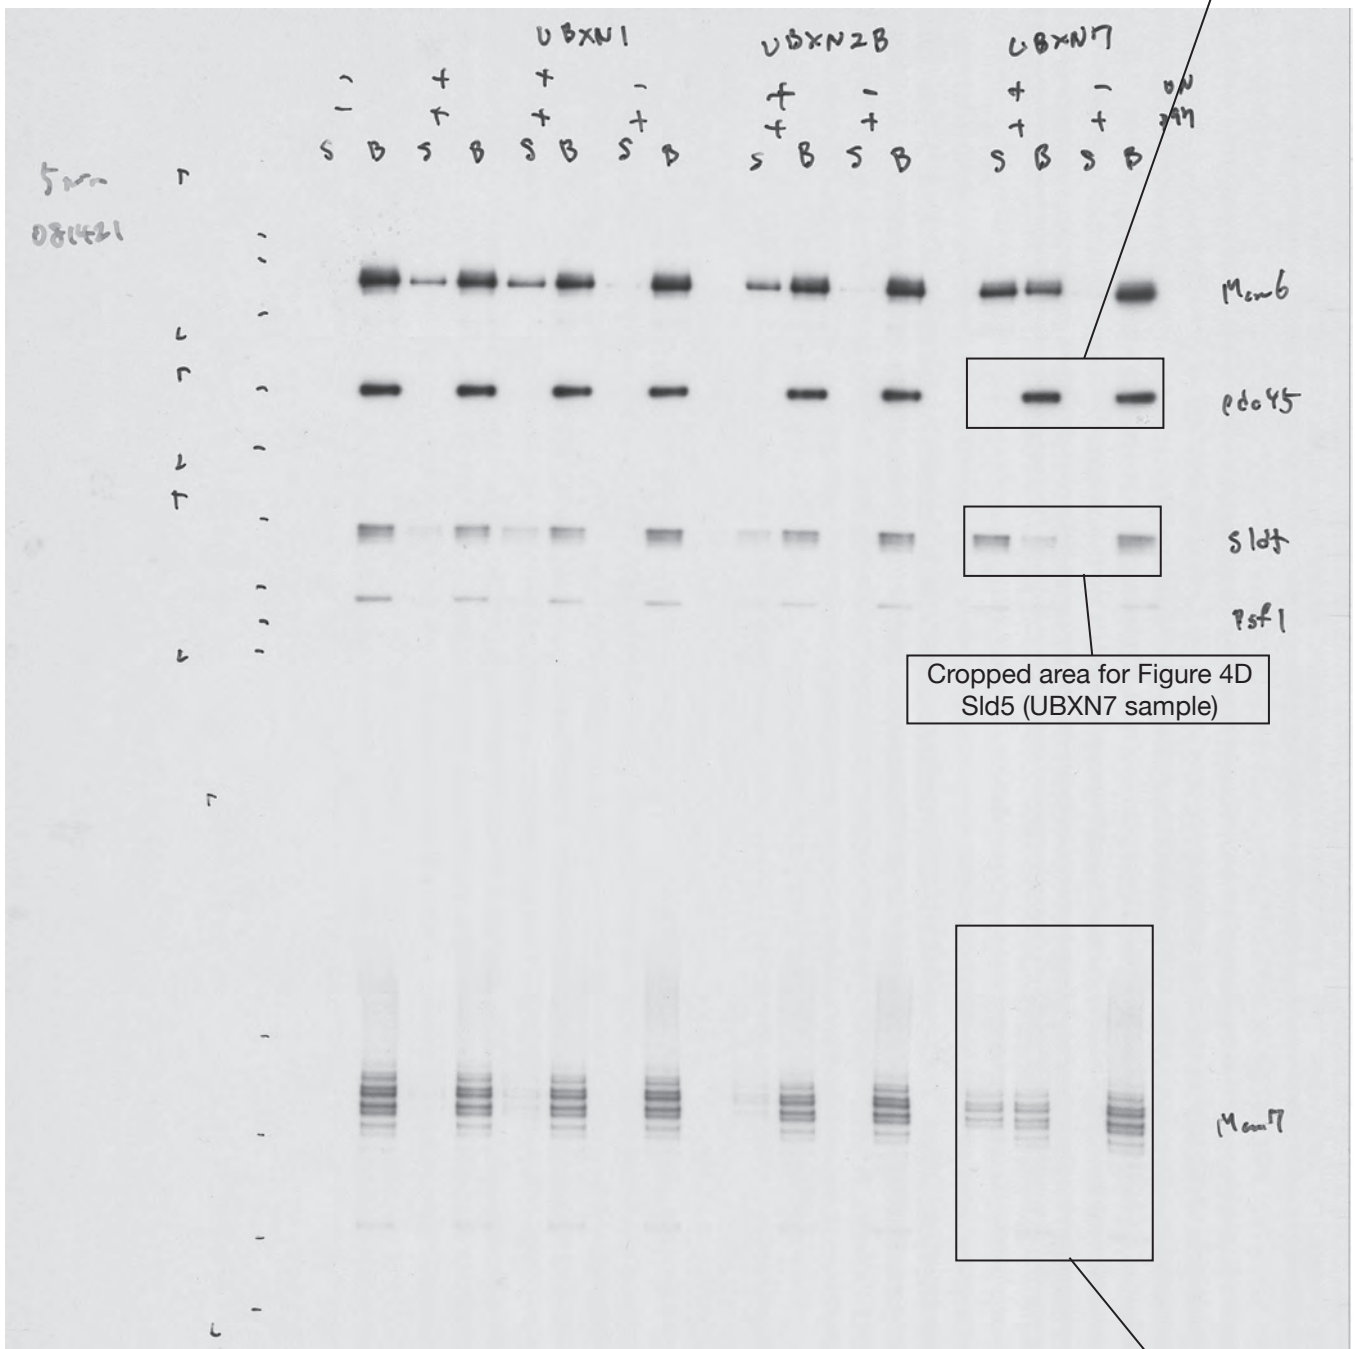

Cropped area for Figure 4D  
Mcm7 (UBXN7 sample)



Cropped area for Figure 4D  
Mcm6 (UBXN7 sample)

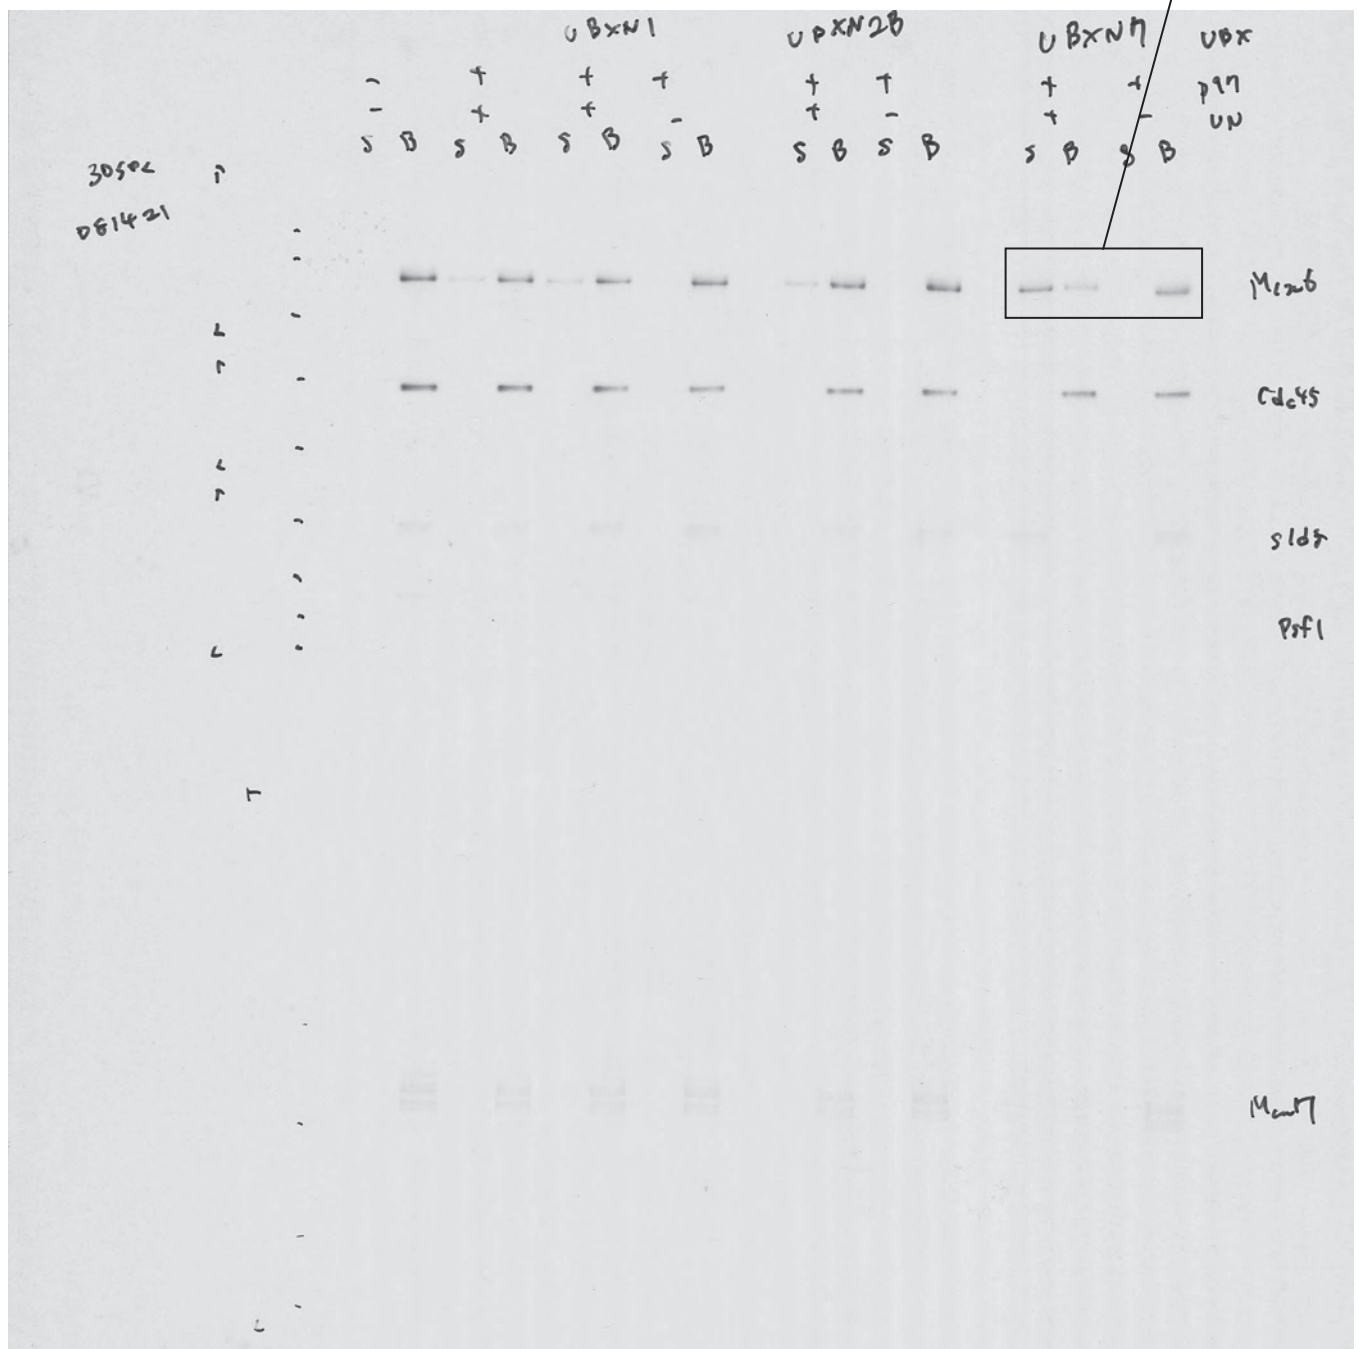



Cropped area for Figure 4E  
Mcm6

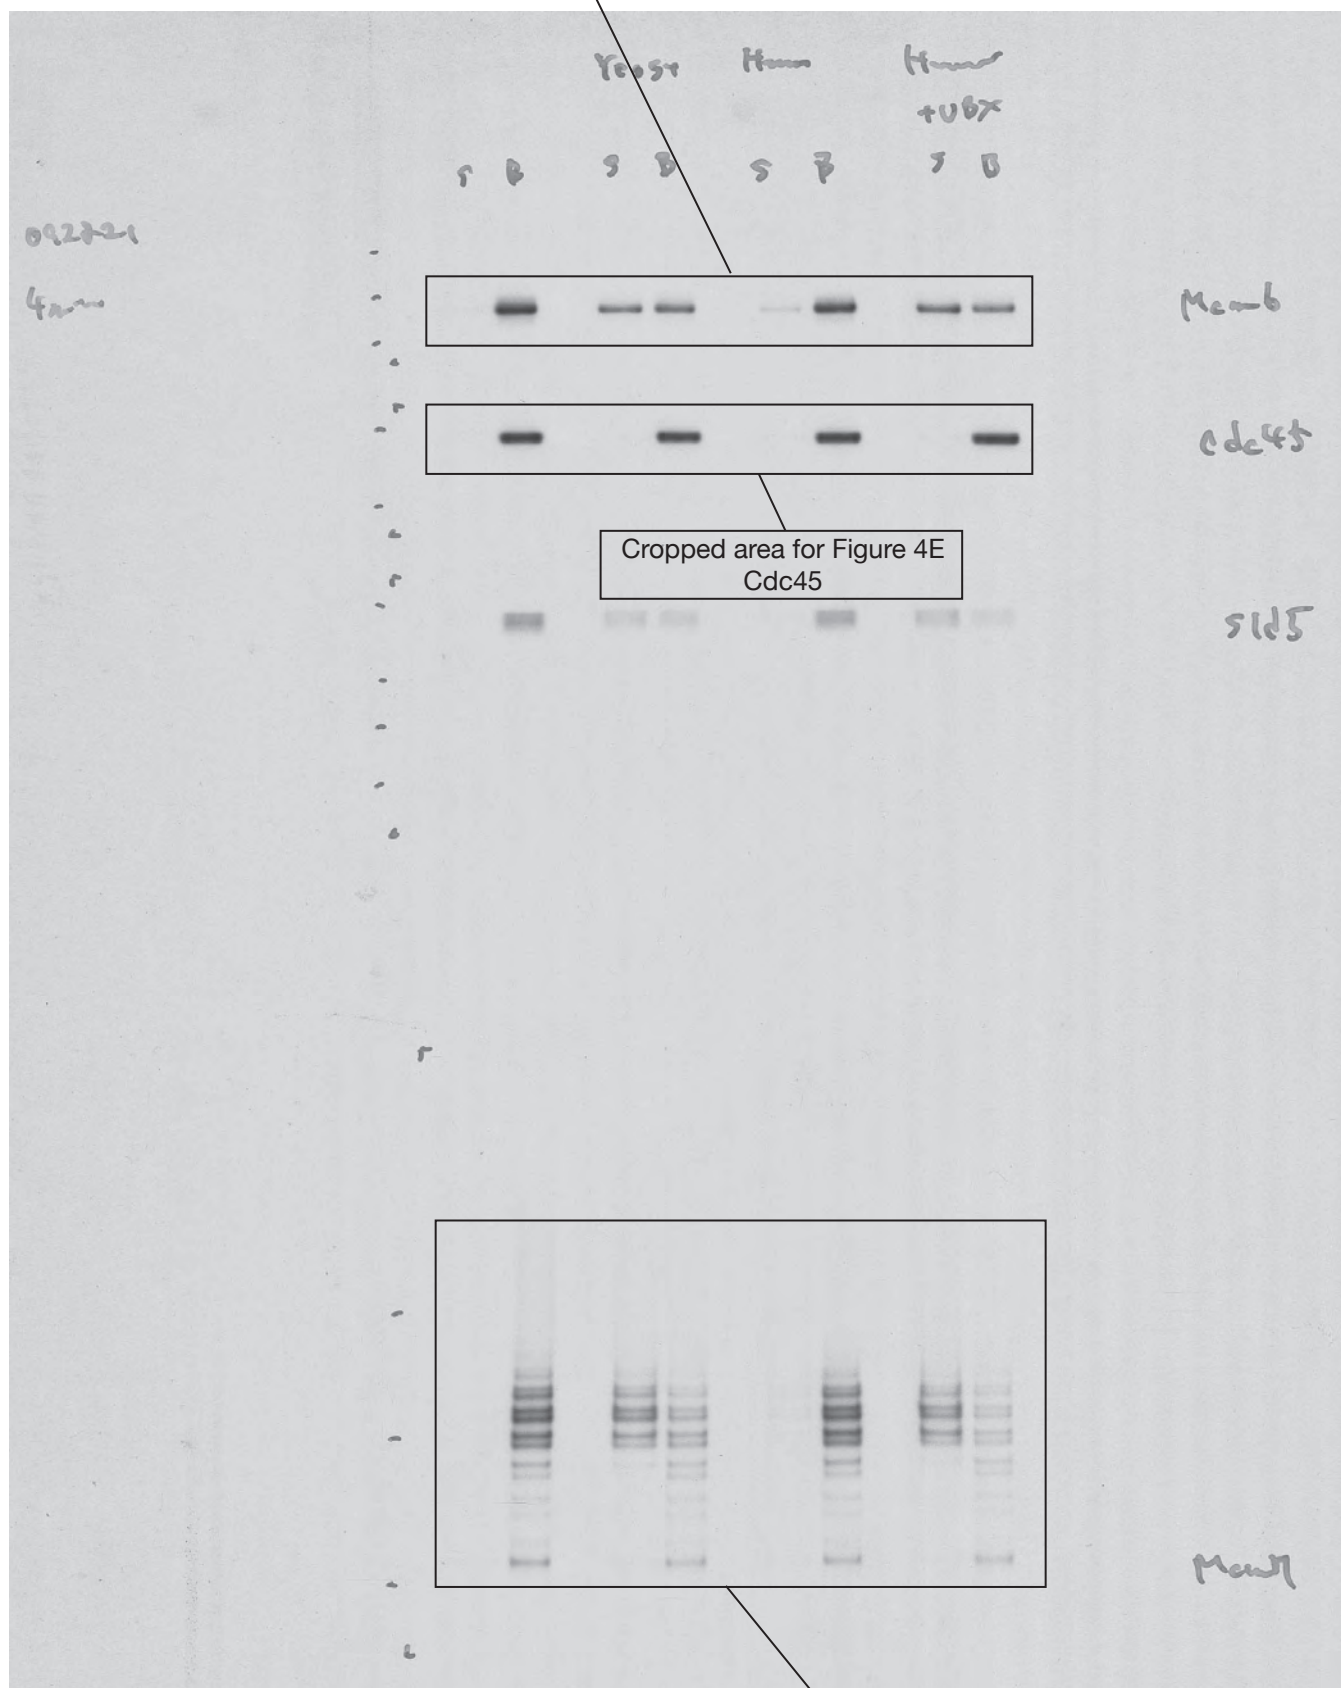

Cropped area for Figure 4E  
Cdc45

Cropped area for Figure 4E  
Mcm7

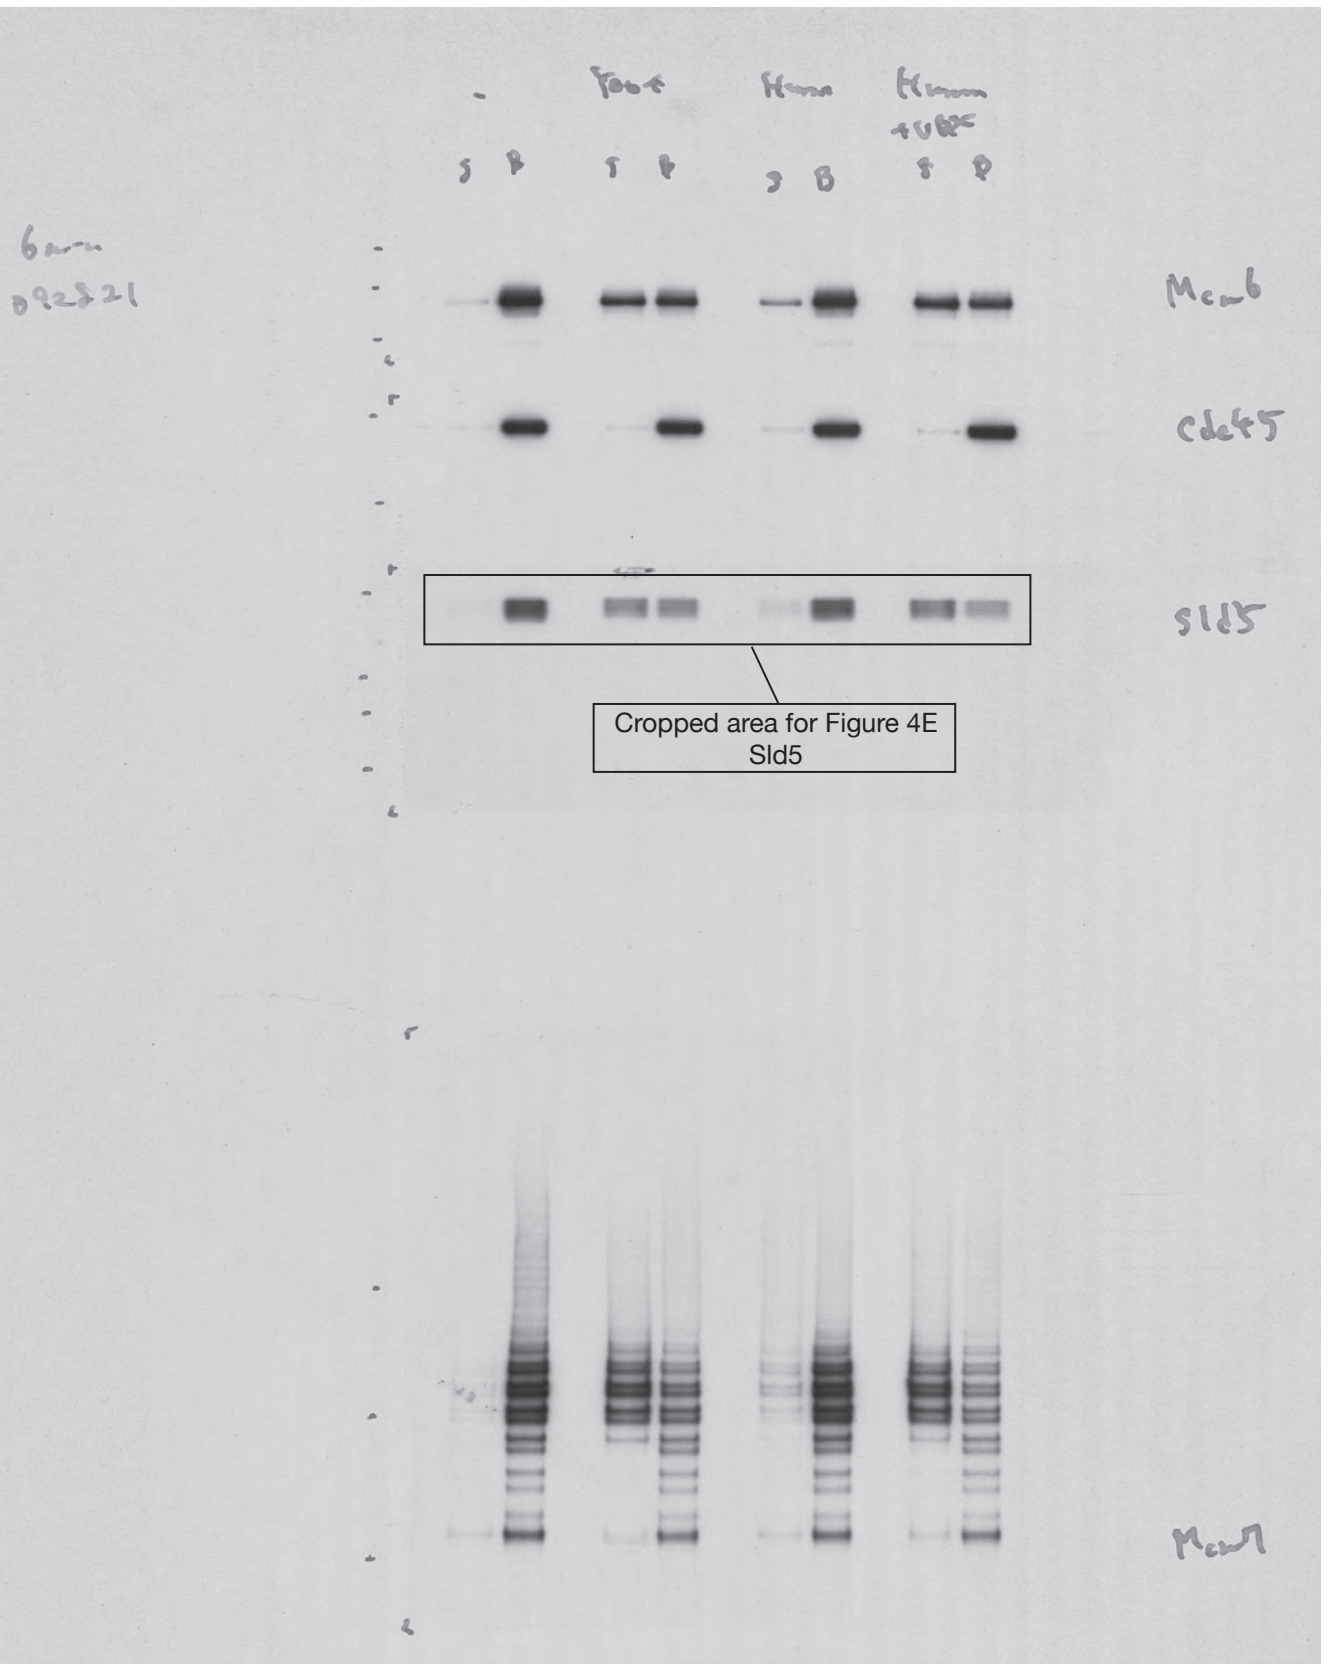

Supplement: supp [file elife-76763-supp-v1.zip]
